# Supplementary material for: Inhibition of the ubiquitin-proteasome system by an NQO1-activatable compound
Source: Cell Death Dis. 2021 Oct 6;12(10):914. doi: 10.1038/s41419-021-04191-9 (PMC8494907; doi:10.1038/s41419-021-04191-9)
Supplement: Supplementary file 2 — Supplementary Table S3 [file 41419_2021_4191_MOESM2_ESM.xlsx]

## Sheet: CBK77_A_vs_Control.gene_summary
id	num	pos|score	pos|p-value	pos|fdr	pos|rank	pos|goodsgrna	pos|lfc
SLC17A6	4	0.83223	0.83259	0.999986	15976	0	-15418
GSTO1	4	0.99187	0.99189	0.999986	19181	0	-22093
NPY4R	4	0.99996	0.99997	0.999986	19361	0	-18672
RSF1	4	0.99999	0.99999	0.999986	19364	0	-16221
PODNL1	4	0.99998	0.99998	0.999986	19363	0	-16487
PPARA	4	0.18396	0.31314	0.999986	6017	2	-0.38026
KCNK4	4	0.99997	0.99997	0.999986	19362	0	-19485
ACADS	4	0.91609	0.91643	0.999986	17593	0	-20748
VGLL4	4	0.99996	0.99996	0.999986	19360	0	-12371
TNFRSF19	4	0.99993	0.99994	0.999986	19359	0	-12395
IBA57	4	0.73309	0.74103	0.999986	14192	1	-0.028165
EPHX3	4	0.99149	0.9915	0.999986	19170	0	-14871
UNC45B	4	0.92409	0.9244	0.999986	17754	0	-15509
GDPD2	4	0.99991	0.99992	0.999986	19358	0	-1611
RNF20	4	0.80642	0.80676	0.999986	15450	0	-48612
NSUN5	4	0.98395	0.98409	0.999986	18986	0	-18502
AFP	4	0.59268	0.64591	0.999986	12330	1	-0.84404
ASB8	4	0.99988	0.99988	0.999986	19357	0	-20145
TMF1	4	0.46131	0.57733	0.999986	10998	1	-11827
MAP2K2	4	0.99987	0.99987	0.999986	19356	0	-21988
MZT2A	4	0.99985	0.99986	0.999986	19355	0	-13922
ABHD8	4	0.82042	0.82074	0.999986	15753	0	-19146
RPN2	4	0.57406	0.63525	0.999986	12112	1	-0.42561
RNF2	4	0.99981	0.99982	0.999986	19354	0	-12336
DRD3	4	0.97966	0.97986	0.999986	18894	0	-14719
AGPAT9	4	0.709	0.72231	0.999986	13822	1	-0.4642
TAF5	4	0.79658	0.79694	0.999986	15259	1	-23527
HMGN2	4	0.55316	0.62362	0.999986	11891	1	-0.72155
CALY	4	0.9974	0.9974	0.999986	19300	0	-19304
BFAR	4	0.95243	0.95269	0.999986	18320	0	-10663
RBBP5	4	0.49832	0.59519	0.999986	11346	1	-14538
FZD1	4	0.99971	0.99972	0.999986	19353	0	-20659
SLC26A10	4	0.99731	0.99731	0.999986	19298	0	-11826
KSR1	4	0.99969	0.99971	0.999986	19352	0	-18493
RASSF2	4	0.92278	0.92309	0.999986	17736	0	-0.54711
RNF111	4	0.9986	0.99861	0.999986	19324	0	-13647
JAM2	4	0.84827	0.84863	0.999986	16275	0	-0.66825
HADHA	4	0.28289	0.41914	0.999986	8022	1	-12624
Control_79	4	0.82312	0.82348	0.999986	15807	0	-0.021329
DDX41	4	0.99961	0.99961	0.999986	19351	0	-20487
PDHA1	4	0.98628	0.98635	0.999986	19049	0	-15246
MYL2	4	0.99753	0.99753	0.999986	19304	0	-14537
OR2AE1	4	0.99957	0.99957	0.999986	19350	0	-10578
R3HCC1L	4	0.97766	0.97784	0.999986	18849	0	-0.89233
NUDT13	4	0.49	0.59108	0.999986	11263	1	-0.83769
ERAP1	4	0.99951	0.99952	0.999986	19349	0	-11472
IFITM5	4	0.99951	0.99952	0.999986	19348	0	-13584
TNNI1	4	0.29032	0.42715	0.999986	8161	2	-0.52685
POLR2L	4	0.69689	0.71341	0.999986	13640	1	-48887
RRAS2	4	0.99858	0.99858	0.999986	19323	0	-13884
SLC6A14	4	0.59996	0.65013	0.999986	12418	1	-14323
DEFB130	4	0.99219	0.9922	0.999986	19191	0	-43632
ARMT1	4	0.62191	0.66336	0.999986	12669	1	-11421
SIT1	4	0.8382	0.83849	0.999986	16095	0	-0.34644
GREB1L	4	0.86729	0.86756	0.999986	16647	0	-14359
PPP1R26	4	0.30409	0.44189	0.999986	8437	2	-0.98805
TSR2	4	0.9994	0.99942	0.999986	19347	0	-39555
KDM6A	4	0.99939	0.99941	0.999986	19346	0	-0.75121
TRA2B	4	0.99939	0.9994	0.999986	19345	0	-19645
RNF31	4	0.99938	0.99939	0.999986	19344	0	-18391
KBTBD6	4	0.89095	0.89114	0.999986	17130	0	-0.89069
SMKR1	4	0.098535	0.21178	0.996885	4106	2	-0.41478
CA1	4	0.95085	0.95109	0.999986	18281	0	-0.81999
TRIM50	4	0.99935	0.99936	0.999986	19343	0	-18456
FDXR	4	0.99934	0.99935	0.999986	19342	0	-42167
DUS4L	4	0.99933	0.99934	0.999986	19341	0	-15607
INSRR	4	0.99933	0.99934	0.999986	19340	0	-12188
FAM216B	4	0.9744	0.97458	0.999986	18792	0	-18965
SRSF9	4	0.99932	0.99933	0.999986	19339	0	-21879
LILRA1	4	0.21663	0.34832	0.999986	6647	1	-0.95765
NMS	4	0.31727	0.45597	0.999986	8691	2	-10632
KRTAP5-2	4	0.77272	0.77437	0.999986	14838	1	-0.93401
RPA3	4	0.99601	0.99601	0.999986	19269	0	-41447
ALG9	4	0.99924	0.99925	0.999986	19338	0	-13822
PYCRL	4	0.92616	0.92643	0.999986	17791	0	-1462
SH2D3A	4	0.99922	0.99922	0.999986	19337	0	-0.87038
PKN1	4	0.90677	0.90708	0.999986	17426	0	-20099
COLGALT1	4	0.64156	0.67561	0.999986	12917	1	-10854
POU4F3	4	0.81125	0.81163	0.999986	15551	0	-12958
TREX1	4	0.99914	0.99915	0.999986	19336	0	-11449
CCDC91	4	0.93365	0.93394	0.999986	17933	0	-11494
NXPH2	4	0.080187	0.17793	0.992961	3466	2	-0.63031
THOC2	4	0.76472	0.76726	0.999986	14684	1	-22227
SLC48A1	4	0.99522	0.99523	0.999986	19258	0	-20905
AIFM2	4	0.99904	0.99904	0.999986	19335	0	-0.98819
SPRYD4	4	0.99903	0.99903	0.999986	19334	0	-15738
DYNC2H1	4	0.87626	0.87657	0.999986	16838	0	-0.30314
Control_199	4	0.59695	0.64836	0.999986	12379	1	-0.94737
SECISBP2L	4	0.99895	0.99896	0.999986	19333	0	-1151
SLC33A1	4	0.99894	0.99895	0.999986	19332	0	-20863
CT47A5	4	0.63047	0.66864	0.999986	12778	1	-0.19783
CLLU1OS	4	0.99894	0.99895	0.999986	19331	0	-0.95096
HIVEP3	4	0.95531	0.95552	0.999986	18386	0	-13253
ADORA2B	4	0.93797	0.9382	0.999986	18012	0	-13934
RASA2	4	0.99874	0.99874	0.999986	19329	0	-15599
CELF2	4	0.9931	0.9931	0.999986	19210	0	-13164
CASC10	4	0.13963	0.26544	0.999776	5138	1	0.12005
MINK1	4	0.4354	0.5652	0.999986	10783	1	-14196
MGAM	4	0.89445	0.89462	0.999986	17206	0	-0.8553
RNASE1	4	0.80196	0.80234	0.999986	15360	1	-0.51246
METTL11B	4	0.64747	0.67941	0.999986	13004	1	0.20678
AEN	4	0.99206	0.99207	0.999986	19188	0	-17927
MVB12A	4	0.99876	0.99876	0.999986	19330	0	-11018
RHOBTB2	4	0.36003	0.50165	0.999986	9606	1	-0.059181
KRT77	4	0.66707	0.69236	0.999986	13247	1	-0.83442
BOD1L1	4	0.99868	0.99868	0.999986	19328	0	-13478
MYT1L	4	0.9881	0.98811	0.999986	19095	0	-11479
COX10	4	0.99867	0.99867	0.999986	19327	0	-10339
NUP107	4	0.99865	0.99865	0.999986	19326	0	-11922
MID1IP1	4	0.93012	0.93037	0.999986	17860	0	-11338
CHRM4	4	0.36904	0.51118	0.999986	9784	2	0.1226
EIF5AL1	4	0.79179	0.79229	0.999986	15165	1	-1584
DNAJC24	4	0.99862	0.99862	0.999986	19325	0	-15775
CNTN3	4	0.92656	0.92681	0.999986	17797	0	-19903
CRCP	4	0.043303	0.10618	0.967013	2116	3	0.56699
HERC6	4	0.8168	0.81714	0.999986	15677	0	-17181
EID1	4	0.08128	0.17997	0.993504	3507	2	-0.75502
RASSF8	4	0.69366	0.71104	0.999986	13593	1	-1256
GCNT3	4	0.99851	0.99851	0.999986	19322	0	-0.92593
AOC2	4	0.61223	0.65743	0.999986	12557	1	-14325
AMN	4	0.037001	0.093334	0.960767	1880	1	-20716
CXorf36	4	0.99848	0.99849	0.999986	19321	0	-1176
HMCN1	4	0.24923	0.38319	0.999986	7327	2	-0.07078
DARS	4	0.58808	0.64326	0.999986	12274	1	-12723
MRE11A	4	0.73398	0.74174	0.999986	14207	1	-12125
LGR4	4	0.88586	0.88607	0.999986	17024	0	-14408
BUD31	4	0.26886	0.40405	0.999986	7707	1	-28838
DUSP1	4	0.72467	0.73441	0.999986	14068	1	-1426
MTO1	4	0.9984	0.99842	0.999986	19320	0	-10062
VWA5B1	4	0.99839	0.99841	0.999986	19319	0	-10741
RPIA	4	0.99838	0.9984	0.999986	19318	0	-44331
PHF2	4	0.97798	0.97818	0.999986	18856	0	-0.80653
ATP5I	4	0.99834	0.99836	0.999986	19317	0	-14451
CYP20A1	4	0.21171	0.34299	0.999986	6550	2	-0.41683
ZNF730	4	0.43428	0.56472	0.999986	10774	1	-12807
SPERT	4	0.35672	0.49814	0.999986	9539	2	-0.50366
FNDC1	4	0.064322	0.14761	0.982162	2906	1	-0.47196
PLCD3	4	0.88709	0.88729	0.999986	17054	0	-11587
LY96	4	0.12266	0.24707	0.999776	4769	1	-12899
ATP5B	4	0.8394	0.83973	0.999986	16120	0	-11796
IRAK2	4	0.74549	0.75108	0.999986	14382	1	-0.092157
CCND2	4	0.95965	0.9599	0.999986	18484	0	-0.8763
FAM177A1	4	0.95571	0.95594	0.999986	18395	0	-0.66327
LOC100130370	4	0.99818	0.9982	0.999986	19316	0	-0.99845
HPS5	4	0.72344	0.73345	0.999986	14051	1	-0.17036
DIP2C	4	0.10877	0.23037	0.997657	4470	2	-0.58279
SLC7A1	4	0.99812	0.99814	0.999986	19315	0	-0.95803
WBP2NL	4	0.48156	0.58702	0.999986	11185	1	-11834
AGO3	4	0.99066	0.99069	0.999986	19150	0	-11842
UQCR10	4	0.99808	0.99811	0.999986	19314	0	-19302
STMND1	4	0.98878	0.98878	0.999986	19104	0	-19571
RNF148	4	0.39722	0.54144	0.999986	10346	1	-0.99774
KIAA1467	4	0.99806	0.99809	0.999986	19313	0	-11228
MEF2BNB	4	0.99805	0.99807	0.999986	19312	0	-16678
MXD3	4	0.99179	0.99182	0.999986	19178	0	-14091
QPRT	4	0.044276	0.10812	0.967013	2152	3	0.48521
PRSS12	4	0.11113	0.23456	0.998384	4538	1	-15729
SBK2	4	0.92145	0.92175	0.999986	17703	0	-0.37325
FADS2	4	0.92005	0.92033	0.999986	17668	0	-20672
TACR3	4	0.91819	0.91848	0.999986	17629	0	-11928
ADH7	4	0.30394	0.44173	0.999986	8434	2	0.24654
RBMY1J	4	0.9979	0.99791	0.999986	19311	0	-0.67991
ASXL3	4	0.63228	0.66975	0.999986	12803	1	-17504
HERC4	4	0.67626	0.69858	0.999986	13371	1	-0.94112
JPH4	4	0.99786	0.99787	0.999986	19310	0	-0.91049
VWA2	4	0.95395	0.95419	0.999986	18356	0	-0.71791
ERO1LB	4	0.99785	0.99785	0.999986	19309	0	-16204
WDR66	4	0.63786	0.67327	0.999986	12879	1	-15013
FAM168B	4	0.88661	0.88679	0.999986	17038	0	-14232
GFRAL	4	0.80452	0.80488	0.999986	15417	0	-14145
TMPRSS5	4	0.10929	0.23131	0.998173	4485	1	-10669
RSPH14	4	0.99346	0.99346	0.999986	19219	0	-12703
DRD4	4	0.99776	0.99776	0.999986	19308	0	-0.93363
KDM2A	4	0.63728	0.67291	0.999986	12874	1	-0.061945
DERA	4	0.274	0.40964	0.999986	7827	1	-0.84446
HOXB8	4	0.76341	0.76613	0.999986	14663	1	-0.95043
RIPPLY1	4	0.99769	0.99769	0.999986	19307	0	-14724
EVL	4	0.8597	0.86005	0.999986	16490	0	-0.85636
GJA5	4	0.9582	0.95843	0.999986	18449	0	-12686
OR5A1	4	0.80198	0.80235	0.999986	15361	1	-0.93857
ITGA7	4	0.97239	0.97259	0.999986	18746	0	-11715
SPRR2F	4	0.99764	0.99764	0.999986	19306	0	-12022
KRTAP9-3	4	0.84928	0.84964	0.999986	16285	0	-14737
PSMB2	4	0.99755	0.99755	0.999986	19305	0	-6061
ZNF571	4	0.34928	0.49027	0.999986	9364	1	-0.33057
ARRDC1	4	0.99752	0.99752	0.999986	19303	0	-0.99857
ABCC1	4	0.99751	0.99751	0.999986	19302	0	-13416
GJB5	4	0.99751	0.9975	0.999986	19301	0	-0.81914
PPP3CA	4	0.042461	0.1045	0.967013	2075	3	0.4292
BCL2L2-PABPN1	4	0.55964	0.62719	0.999986	11956	1	-14308
ENO4	4	0.95123	0.9515	0.999986	18292	0	-12007
HS3ST3B1	4	0.15684	0.28405	0.999986	5468	2	-0.74622
MAGEA8	4	0.79495	0.79535	0.999986	15221	1	-0.50731
FDXACB1	4	0.11316	0.23686	0.998815	4591	2	-0.71096
COL9A2	4	0.1875	0.31696	0.999986	6083	1	-0.49209
TPST2	4	0.96642	0.96664	0.999986	18632	0	-15778
CASQ1	4	0.99737	0.99738	0.999986	19299	0	-1113
COL4A3	4	0.83249	0.83283	0.999986	15980	0	-14205
ZDHHC13	4	0.2496	0.38358	0.999986	7339	1	-0.27415
GBP4	4	0.37824	0.52108	0.999986	9978	2	-0.024401
SLC26A6	4	0.99306	0.99305	0.999986	19209	0	-14642
PITPNB	4	0.73905	0.74584	0.999986	14282	1	-11531
NLK	4	0.99423	0.99426	0.999986	19231	0	-1538
NOTCH1	4	0.89458	0.89476	0.999986	17210	0	-0.31816
C7orf60	4	0.9675	0.96771	0.999986	18650	0	-11583
GABBR1	4	0.36265	0.50448	0.999986	9653	1	-10027
RUNDC3B	4	0.91391	0.91422	0.999986	17554	0	-0.39651
CYP2C18	4	0.92589	0.92616	0.999986	17784	0	-0.82859
C17orf75	4	0.99718	0.99718	0.999986	19297	0	-13022
PDE6B	4	0.99718	0.99718	0.999986	19296	0	-0.75896
TAS2R5	4	0.65033	0.6813	0.999986	13041	1	-10138
NAALADL2	4	0.98733	0.98733	0.999986	19075	0	-11664
CSNK1G2	4	0.39572	0.53987	0.999986	10315	2	-0.96255
CRISP2	4	0.71711	0.72847	0.999986	13954	1	-12279
LPAR5	4	0.99704	0.99705	0.999986	19295	0	-0.76326
TNIP1	4	0.967	0.96723	0.999986	18641	0	-13881
TEX38	4	0.63028	0.66851	0.999986	12776	1	-0.31847
FGF13	4	0.99703	0.99705	0.999986	19294	0	-0.90867
KRT40	4	0.17729	0.30594	0.999986	5871	2	-0.48222
SENP8	4	0.99369	0.99369	0.999986	19224	0	-13452
NIPA2	4	0.99698	0.997	0.999986	19293	0	-10808
PTPRD	4	0.99696	0.99698	0.999986	19292	0	-12058
TMPRSS13	4	0.87752	0.8778	0.999986	16869	0	-0.87431
ZFP36	4	0.050054	0.11968	0.972509	2383	2	0.43973
DNM1L	4	0.99691	0.99692	0.999986	19291	0	-0.98508
XDH	4	0.88082	0.8811	0.999986	16925	0	-13363
COQ2	4	0.74233	0.74851	0.999986	14330	1	-0.81957
SMC5	4	0.73563	0.74309	0.999986	14237	1	-11444
AQP2	4	0.69898	0.71499	0.999986	13671	1	-11437
LCN2	4	0.99687	0.99688	0.999986	19290	0	-17846
CT47A11	4	0.56719	0.63139	0.999986	12032	1	-16157
ARHGEF39	4	0.054642	0.12877	0.982162	2533	2	0.65518
GRM5	4	0.99682	0.99683	0.999986	19289	0	-0.83504
ZNF587	4	0.9968	0.99681	0.999986	19288	0	-0.79299
HSD17B10	4	0.99678	0.99679	0.999986	19287	0	-17038
LTF	4	0.7491	0.75409	0.999986	14438	1	-0.52683
HCAR3	4	0.75798	0.76155	0.999986	14579	1	-10393
ALG14	4	0.99676	0.99678	0.999986	19286	0	-0.84632
KLHL29	4	0.89285	0.89305	0.999986	17175	0	-11434
ST14	4	0.50352	0.59777	0.999986	11400	1	-0.82219
RECQL5	4	0.69837	0.71453	0.999986	13663	1	-0.356
CIB4	4	0.99668	0.9967	0.999986	19285	0	-37873
ADD1	4	0.93033	0.93058	0.999986	17864	0	-16365
SEC14L2	4	0.99666	0.99668	0.999986	19284	0	-0.89142
GNMT	4	0.50411	0.59809	0.999986	11405	1	-1463
EPRS	4	0.31646	0.45513	0.999986	8675	1	-29765
OR4P4	4	0.74789	0.75307	0.999986	14415	1	-10908
FAM151A	4	0.75596	0.75984	0.999986	14547	1	-0.28601
FATE1	4	0.68439	0.7043	0.999986	13478	1	-0.33775
NOMO1	4	0.96095	0.96117	0.999986	18514	0	-10318
GAGE10	4	0.99663	0.99664	0.999986	19283	0	-0.92139
OR10X1	4	0.99659	0.99659	0.999986	19282	0	-0.79854
CCR7	4	0.91488	0.91521	0.999986	17570	0	-0.5005
DPP4	4	0.13477	0.26023	0.999776	5020	2	-0.75905
OPLAH	4	0.99654	0.99655	0.999986	19281	0	-19392
TPRKB	4	0.37148	0.51383	0.999986	9832	2	-0.52356
CRYBA2	4	0.98078	0.98099	0.999986	18917	0	-12267
THSD1	4	0.99036	0.99039	0.999986	19141	0	-0.81173
TAPT1	4	0.75709	0.76083	0.999986	14569	1	-10816
TAZ	4	0.99649	0.9965	0.999986	19280	0	-13793
ARID4A	4	0.79366	0.79413	0.999986	15200	1	-0.44482
JOSD1	4	0.074306	0.16689	0.989501	3264	2	0.44644
TTC36	4	0.61888	0.66149	0.999986	12640	1	-0.88294
XPOT	4	0.42223	0.55929	0.999986	10673	1	-16961
S1PR4	4	0.79209	0.79257	0.999986	15174	1	-10334
ST6GAL2	4	0.35354	0.49479	0.999986	9454	1	-14539
TAB3	4	0.18347	0.31261	0.999986	6004	2	0.11413
PTBP1	4	0.9963	0.99631	0.999986	19279	0	-43553
NLN	4	0.99629	0.99631	0.999986	19278	0	-10671
PLD6	4	0.043462	0.10651	0.967013	2123	1	-11813
ESRP1	4	0.94705	0.94728	0.999986	18187	0	-16501
C2orf91	4	0.99624	0.99626	0.999986	19277	0	-0.59334
NCALD	4	0.49075	0.59145	0.999986	11267	1	-21239
NUP133	4	0.99623	0.99624	0.999986	19276	0	-53782
FAM19A4	4	0.65445	0.68399	0.999986	13082	1	-0.67136
WDR92	4	0.82701	0.82737	0.999986	15881	0	-22507
ZDHHC3	4	0.51423	0.60325	0.999986	11496	1	-11251
NOP9	4	0.9962	0.9962	0.999986	19275	0	-11815
GNA11	4	0.99617	0.99618	0.999986	19274	0	-14358
METTL14	4	0.92137	0.92167	0.999986	17699	0	-1744
PGBD1	4	0.99614	0.99614	0.999986	19273	0	-13318
NCR2	4	0.99161	0.99162	0.999986	19173	0	-0.98691
GLI4	4	0.99339	0.99339	0.999986	19218	0	-12115
CHRM3	4	0.99608	0.99608	0.999986	19272	0	-0.94051
SGCZ	4	0.57415	0.63529	0.999986	12114	1	-0.61125
SLC13A1	4	0.99605	0.99606	0.999986	19271	0	-12882
USP17L19	4	0.99601	0.99601	0.999986	19270	0	-10416
NDST1	4	0.85362	0.85401	0.999986	16377	0	-0.99076
CEBPE	4	0.94904	0.94924	0.999986	18239	0	-12392
IL2RG	4	0.99596	0.99596	0.999986	19268	0	-12102
SEPHS2	4	0.96445	0.96469	0.999986	18591	0	-27962
ANKS1A	4	0.54771	0.62071	0.999986	11828	1	-11163
PRKAB1	4	0.53516	0.61399	0.999986	11694	1	-0.85902
CUL1	4	0.008829	0.02983	0.912258	616	2	-0.22842
ATG14	4	0.99582	0.99581	0.999986	19267	0	-11304
CFAP52	4	0.59946	0.64983	0.999986	12412	1	-0.47155
EXOSC9	4	0.19236	0.32219	0.999986	6176	1	-41219
PSMA1	4	0.99579	0.99577	0.999986	19266	0	-37151
CYP4Z1	4	0.99579	0.99577	0.999986	19265	0	-14245
SEMA3A	4	0.80118	0.80157	0.999986	15345	1	-0.97246
Control_64	4	0.73548	0.74295	0.999986	14234	1	-11731
B4GALT2	4	0.34685	0.48768	0.999986	9324	2	-0.56545
INTS12	4	0.70159	0.71685	0.999986	13712	1	-15555
C11orf96	4	0.99572	0.99571	0.999986	19264	0	-15288
DNAI2	4	0.98883	0.98883	0.999986	19107	0	-32373
GPR174	4	0.70762	0.72127	0.999986	13796	1	-0.97434
TEX12	4	0.73281	0.74081	0.999986	14185	1	-10564
MCMBP	4	0.99568	0.99566	0.999986	19263	0	-44378
GFM2	4	0.95994	0.96017	0.999986	18493	0	-19567
HS3ST4	4	0.99565	0.99563	0.999986	19262	0	-0.99062
GLRB	4	0.78958	0.79016	0.999986	15123	1	-0.10247
GPR143	4	0.18387	0.31304	0.999986	6013	2	-0.60845
BARHL2	4	0.9956	0.99559	0.999986	19261	0	-13071
Control_129	4	0.9614	0.9616	0.999986	18521	0	-0.69405
KAT6B	4	0.56746	0.63154	0.999986	12038	1	-0.82705
ZNF708	4	0.81081	0.81119	0.999986	15542	0	-0.76684
RANBP3L	4	0.97925	0.97946	0.999986	18886	0	-0.98918
LALBA	4	0.92956	0.92979	0.999986	17850	0	-0.41981
KCNV1	4	0.99552	0.99551	0.999986	19260	0	-0.66301
METTL25	4	0.52758	0.61011	0.999986	11624	1	-24112
LRRTM3	4	0.76744	0.76965	0.999986	14734	1	-0.87585
HSPA14	4	0.99545	0.99545	0.999986	19259	0	-17833
KCNE2	4	0.25455	0.38879	0.999986	7424	1	-0.37847
DPH2	4	0.062404	0.14389	0.982162	2829	1	-39507
TNPO3	4	0.78188	0.78291	0.999986	14995	1	-41872
POLD3	4	0.58575	0.64191	0.999986	12248	1	-2258
CD276	4	0.85431	0.8547	0.999986	16389	0	-0.29513
SP140L	4	0.84936	0.84971	0.999986	16288	0	-14422
FXYD1	4	0.63665	0.67251	0.999986	12862	1	-10428
CLCN5	4	0.53127	0.612	0.999986	11655	1	-0.91585
TMEM68	4	0.87586	0.87616	0.999986	16829	0	-0.51245
PLA2G1B	4	0.92321	0.92352	0.999986	17742	0	-1.68
OR10P1	4	0.38426	0.52757	0.999986	10097	1	-0.84681
DLX5	4	0.9514	0.95166	0.999986	18297	0	-16692
TTK	4	0.09777	0.21041	0.996885	4078	1	0.048005
MTCH2	4	0.9931	0.9931	0.999986	19211	0	-26849
SLC26A4	4	0.98634	0.9864	0.999986	19050	0	-18795
MAST2	4	0.96096	0.96119	0.999986	18515	0	-0.59543
SSX1	4	0.87656	0.87686	0.999986	16848	0	-12339
DHX30	4	0.654	0.68369	0.999986	13079	1	-12834
KRTAP4-12	4	0.98967	0.98969	0.999986	19129	0	-15286
DPH3P1	4	0.10021	0.21482	0.996885	4166	1	-14057
TAS2R16	4	0.33782	0.47799	0.999986	9145	2	0.17752
RPL34	4	0.99506	0.99508	0.999986	19257	0	-34287
NDOR1	4	0.99506	0.99508	0.999986	19256	0	-33316
LRRC23	4	0.36049	0.50212	0.999986	9618	2	0.081506
CELSR2	4	0.35242	0.49358	0.999986	9425	1	-1552
MRPL13	4	0.95938	0.95964	0.999986	18477	0	-15235
ZNF488	4	0.99501	0.99502	0.999986	19255	0	-0.8869
MTRNR2L5	4	0.54253	0.61787	0.999986	11771	1	-0.87267
ADGRB3	4	0.92155	0.92184	0.999986	17707	0	-11305
COMTD1	4	0.91237	0.91268	0.999986	17532	0	-1152
FABP5	4	0.29424	0.43132	0.999986	8233	2	-0.90993
EFCAB13	4	0.99493	0.99494	0.999986	19254	0	-12609
OR8D1	4	0.15984	0.2872	0.999986	5535	2	0.07716
PAN2	4	0.99492	0.99492	0.999986	19253	0	-10943
EFCAB1	4	0.7488	0.75384	0.999986	14433	1	-0.91906
TBCK	4	0.99488	0.99489	0.999986	19252	0	-11627
FAM86B1	4	0.7646	0.76716	0.999986	14682	1	-10341
BMF	4	0.22304	0.00010303	0.153465	13	3	14045
ATP5J2	4	0.99485	0.99486	0.999986	19251	0	-17461
SLC25A4	4	0.90116	0.90145	0.999986	17327	0	-14983
MRPL24	4	0.99483	0.99484	0.999986	19250	0	-12885
NECAB3	4	0.99482	0.99484	0.999986	19249	0	-0.87391
RXRG	4	0.99481	0.99483	0.999986	19248	0	-13042
C1QL4	4	0.63679	0.67258	0.999986	12864	1	-0.92386
AQP6	4	0.9726	0.97281	0.999986	18748	0	-0.93747
WNK3	4	0.027513	0.073633	0.942604	1511	2	-0.45007
TMEM44	4	0.80858	0.80893	0.999986	15494	0	-12255
TDO2	4	0.8298	0.83011	0.999986	15936	0	-10308
ABTB2	4	0.75276	0.75714	0.999986	14492	1	-0.17145
VPS33B	4	0.99476	0.99478	0.999986	19247	0	-0.86835
HSPA4	4	0.96554	0.96576	0.999986	18614	0	-12212
PAWR	4	0.98992	0.98992	0.999986	19134	0	-13572
LMBR1L	4	0.28695	0.42349	0.999986	8094	1	-10486
NAP1L3	4	0.26396	0.39887	0.999986	7599	2	0.28138
DDX1	4	0.9947	0.99471	0.999986	19246	0	-12937
EFCAB2	4	0.99469	0.99471	0.999986	19245	0	-10451
SCAMP2	4	0.83076	0.83109	0.999986	15955	0	0.11302
LECT1	4	0.99466	0.99467	0.999986	19244	0	-10931
OR5M3	4	0.40173	0.54641	0.999986	10417	1	-14539
MAPK4	4	0.04999	0.11957	0.972382	2381	1	-0.44205
FAM186A	4	0.87294	0.87324	0.999986	16772	0	-1026
CTSO	4	0.036561	0.092456	0.960727	1862	3	0.77428
COX15	4	0.99461	0.99462	0.999986	19243	0	-10514
MN1	4	0.9946	0.9946	0.999986	19242	0	-0.7533
ACO2	4	0.99457	0.99458	0.999986	19241	0	-18375
NEBL	4	0.99457	0.99458	0.999986	19240	0	-0.97685
SERPINB6	4	0.98682	0.98685	0.999986	19061	0	-12548
MTPAP	4	0.99455	0.99456	0.999986	19239	0	-0.97186
RBP7	4	0.69929	0.71522	0.999986	13678	1	-10436
KIAA1462	4	0.73034	0.73886	0.999986	14148	1	-12817
MAP4K3	4	0.25027	0.38432	0.999986	7352	2	0.1974
IFNA16	4	0.87689	0.87719	0.999986	16856	0	-0.81607
PLEKHF1	4	0.19876	0.32905	0.999986	6301	1	-11524
EFTUD2	4	0.98722	0.98723	0.999986	19072	0	-55561
RAX2	4	0.99444	0.99445	0.999986	19238	0	-11889
KRTAP16-1	4	0.49311	0.59261	0.999986	11287	1	-0.79005
SIGLEC10	4	0.99103	0.99104	0.999986	19158	0	-0.87502
C19orf44	4	0.96636	0.96658	0.999986	18630	0	-15074
RXFP2	4	0.99442	0.99443	0.999986	19237	0	-1402
Control_97	4	0.99441	0.99442	0.999986	19236	0	-0.53258
NCAM1	4	0.79204	0.79253	0.999986	15172	1	-0.21746
HERC3	4	0.93991	0.94016	0.999986	18047	0	-14896
OTOA	4	0.57521	0.63591	0.999986	12133	1	0.017259
CHFR	4	0.95976	0.95999	0.999986	18490	0	-15179
SLC41A1	4	0.99434	0.99435	0.999986	19235	0	-14783
KLHDC8B	4	0.059927	0.13908	0.982162	2737	2	0.28197
NPAT	4	0.99428	0.9943	0.999986	19234	0	-0.96276
OR8G2	4	0.12158	0.24592	0.999776	4751	1	-0.60468
PRR22	4	0.99425	0.99428	0.999986	19233	0	-10237
ADPRHL1	4	0.98953	0.98954	0.999986	19125	0	-11415
GGNBP2	4	0.99424	0.99427	0.999986	19232	0	-15643
TOM1	4	0.74385	0.74977	0.999986	14359	1	-0.56003
BPY2B	4	0.85249	0.85286	0.999986	16352	0	-0.92749
STAC	4	0.31062	0.44886	0.999986	8566	1	-11209
PDE4A	4	0.96281	0.963	0.999986	18554	0	-12233
SUOX	4	0.99415	0.99418	0.999986	19230	0	-52856
EHF	4	0.0080133	0.027215	0.912258	575	2	0.77573
ZWILCH	4	0.45469	0.57414	0.999986	10937	1	-0.64973
SERPINI1	4	0.99413	0.99415	0.999986	19229	0	-0.58639
FAM171B	4	0.56636	0.63093	0.999986	12022	1	-0.076497
ARCN1	4	0.99405	0.99408	0.999986	19228	0	-15465
ALDH2	4	0.86607	0.86636	0.999986	16620	0	-0.43863
GAB2	4	0.35893	0.50052	0.999986	9586	2	-0.52039
SLC22A20	4	0.072843	0.1641	0.988817	3209	2	-0.93678
NACC1	4	0.99395	0.99397	0.999986	19227	0	-11879
GPN2	4	0.81128	0.81166	0.999986	15552	0	-0.25974
ARHGEF4	4	0.31941	0.4583	0.999986	8751	1	-15061
TNFRSF17	4	0.71663	0.72809	0.999986	13946	1	-10124
PLAG1	4	0.85862	0.85897	0.999986	16472	0	-11258
PRKG2	4	0.87622	0.87653	0.999986	16837	0	-0.83768
GPR161	4	0.94706	0.94729	0.999986	18188	0	-11054
PCDH17	4	0.6417	0.6757	0.999986	12919	1	-0.47412
VPS18	4	0.33355	0.4735	0.999986	9064	2	-0.35104
MRAP	4	0.83337	0.83369	0.999986	15999	0	-0.95927
CXorf49	4	0.98512	0.98524	0.999986	19022	0	-26417
NONO	4	0.99383	0.99384	0.999986	19226	0	-13215
PPP2R4	4	0.29391	0.43096	0.999986	8224	2	0.17415
P2RX2	4	0.99377	0.99377	0.999986	19225	0	-0.81008
SOD1	4	0.19889	0.32919	0.999986	6306	1	-28886
NOXRED1	4	0.20461	0.33538	0.999986	6409	1	-0.48197
LOC200726	4	0.56406	0.62965	0.999986	12005	1	-16485
SLIRP	4	0.93084	0.93109	0.999986	17877	0	-0.87593
ZNF511	4	0.99367	0.99368	0.999986	19223	0	-22671
NOA1	4	0.99366	0.99366	0.999986	19222	0	-0.99348
HEPACAM	4	0.97533	0.97551	0.999986	18809	0	-1934
RGS4	4	0.99362	0.99362	0.999986	19221	0	-10591
SPATA31A5	4	0.9463	0.94655	0.999986	18172	0	-37769
CCL24	4	0.89179	0.89196	0.999986	17143	0	-0.48528
CHTF8	4	0.73757	0.74464	0.999986	14265	1	-18011
SENP1	4	0.47141	0.58217	0.999986	11095	1	-0.84705
TAX1BP3	4	0.92866	0.9289	0.999986	17834	0	-0.39443
PIP	4	0.30064	0.43821	0.999986	8357	1	-10472
COQ3	4	0.96267	0.96288	0.999986	18552	0	-11956
FAM114A1	4	0.9338	0.93408	0.999986	17938	0	-0.7144
MAP2K5	4	0.069373	0.15747	0.987261	3084	1	-11696
THEM6	4	0.17456	0.30309	0.999986	5824	1	-0.85395
SYVN1	4	0.10164	0.21742	0.996885	4212	1	-17757
SLC38A11	4	0.2086	0.33969	0.999986	6490	1	-17702
RPL10A	4	0.99349	0.99349	0.999986	19220	0	-57058
NEDD4L	4	0.97886	0.97906	0.999986	18874	0	-14506
PHC1	4	0.90961	0.90992	0.999986	17476	0	-15152
PID1	4	0.10995	0.23248	0.998384	4506	1	-0.51936
SLC7A6OS	4	0.60339	0.65216	0.999986	12453	1	-10483
LAGE3	4	0.99207	0.99208	0.999986	19189	0	-27052
ADAMTS5	4	0.97465	0.97482	0.999986	18798	0	-0.70595
PATL1	4	0.97007	0.97028	0.999986	18698	0	-21079
CRABP2	4	0.84789	0.84823	0.999986	16272	0	-11627
GPR152	4	0.66419	0.69043	0.999986	13212	1	-0.058614
TTC34	4	0.98435	0.98449	0.999986	18995	0	-18299
PBX2	4	0.99337	0.99338	0.999986	19217	0	-0.93424
ARIH1	4	0.99336	0.99336	0.999986	19216	0	-20721
NMB	4	0.93943	0.93969	0.999986	18034	0	-13145
PFDN1	4	0.81241	0.81274	0.999986	15575	0	-0.35545
CSMD3	4	0.85878	0.85915	0.999986	16475	0	-12898
SRD5A3	4	0.78842	0.78906	0.999986	15102	1	-0.83794
PDS5B	4	0.27444	0.4101	0.999986	7835	1	-0.99268
CACNB1	4	0.99325	0.99324	0.999986	19215	0	-10889
BRD2	4	0.80525	0.8056	0.999986	15430	0	-0.89582
FUS	4	0.88901	0.88921	0.999986	17093	0	-0.7583
KDM4A	4	0.059201	0.13765	0.982162	2708	2	0.24173
IFT88	4	0.9932	0.9932	0.999986	19214	0	-0.7599
EGR3	4	0.99319	0.99319	0.999986	19213	0	-0.87482
SNX11	4	0.74312	0.74918	0.999986	14342	1	-0.98961
IL17RB	4	0.35803	0.49953	0.999986	9567	1	-0.60282
SCGB1D2	4	0.99316	0.99316	0.999986	19212	0	-0.86125
CUEDC1	4	0.99142	0.99143	0.999986	19169	0	-12679
FGF17	4	0.53187	0.61231	0.999986	11664	1	-0.064264
ARHGEF25	4	0.88676	0.88696	0.999986	17043	0	-13206
SH3D21	4	0.95595	0.95617	0.999986	18399	0	-11267
ART3	4	0.30607	0.44399	0.999986	8478	1	-0.2601
MSI2	4	0.99301	0.99301	0.999986	19208	0	-0.89451
PILRA	4	0.99299	0.99299	0.999986	19207	0	-0.71065
FANCG	4	0.86002	0.86038	0.999986	16496	0	-0.90743
2005-03-01	4	0.99297	0.99297	0.999986	19206	0	-10294
RELN	4	0.874	0.8743	0.999986	16792	0	-0.57346
SLC44A3	4	0.42295	0.55962	0.999986	10676	1	-0.98615
MPC2	4	0.99293	0.99293	0.999986	19205	0	-0.71072
CFD	4	0.17379	0.30222	0.999986	5807	2	-0.022091
NOS3	4	0.6714	0.69529	0.999986	13305	1	-0.52349
GDNF	4	0.99288	0.99288	0.999986	19204	0	-1018
CSTF2T	4	0.96162	0.96182	0.999986	18525	0	-13269
PCBP2	4	0.79897	0.79935	0.999986	15300	1	-13617
CCDC86	4	0.24225	0.37571	0.999986	7178	1	-12507
DAZ3	4	0.48482	0.58859	0.999986	11218	1	-0.33585
CTSZ	4	0.98648	0.98652	0.999986	19054	0	-0.85495
CCDC71L	4	0.67513	0.69779	0.999986	13357	1	-10282
TRIP4	4	0.9928	0.99278	0.999986	19203	0	-11681
EPG5	4	0.99279	0.99278	0.999986	19202	0	-0.6627
STAMBPL1	4	0.4605	0.57693	0.999986	10989	1	-12757
SDHA	4	0.98942	0.98944	0.999986	19120	0	-45465
MAB21L1	4	0.69263	0.71026	0.999986	13582	1	-10156
SKA3	4	0.8102	0.81057	0.999986	15533	0	-0.96294
ARGLU1	4	0.99274	0.99274	0.999986	19201	0	-16102
HTRA2	4	0.80521	0.80555	0.999986	15429	0	-13125
BAG1	4	0.75353	0.75779	0.999986	14509	1	0.026002
PLEKHH1	4	0.90742	0.90771	0.999986	17437	0	-0.93533
STARD3	4	0.94854	0.94877	0.999986	18222	0	-11041
AP3B2	4	0.99263	0.99262	0.999986	19200	0	-0.73844
RNF121	4	0.98098	0.98117	0.999986	18923	0	-13627
C20orf173	4	0.99261	0.9926	0.999986	19199	0	-0.7901
HMHA1	4	0.99257	0.99257	0.999986	19198	0	-0.74957
TMEM185B	4	0.93115	0.93141	0.999986	17886	0	-0.53962
FKBP15	4	0.95269	0.95294	0.999986	18325	0	-12446
REST	4	0.99253	0.99252	0.999986	19197	0	-0.86278
RGS21	4	0.52505	0.60882	0.999986	11599	1	-0.60799
RABEPK	4	0.87667	0.87696	0.999986	16852	0	-0.65739
ARHGEF1	4	0.16194	0.28949	0.999986	5580	2	-0.011552
EMG1	4	0.99249	0.99249	0.999986	19196	0	-3525
UBE2U	4	0.74376	0.7497	0.999986	14357	1	-0.11891
URAD	4	0.58998	0.64432	0.999986	12298	1	-10822
JAG1	4	0.49356	0.5928	0.999986	11292	1	-0.96553
TPX2	4	0.007186	0.02458	0.912258	520	1	-15822
CDK11A	4	0.99234	0.99235	0.999986	19195	0	-12422
TRPV3	4	0.99234	0.99234	0.999986	19194	0	-0.57107
SYNGR1	4	0.67561	0.69812	0.999986	13366	1	-11465
GAGE12C	4	0.92996	0.9302	0.999986	17858	0	-12137
SRPX	4	0.42483	0.56045	0.999986	10686	1	-0.84013
PDGFRA	4	0.99226	0.99227	0.999986	19193	0	-0.9487
KIF22	4	0.91059	0.9109	0.999986	17502	0	-19661
OR1Q1	4	0.95344	0.95368	0.999986	18345	0	-10871
NAIP	4	0.99224	0.99225	0.999986	19192	0	-0.94516
POLR3B	4	0.85302	0.85339	0.999986	16363	0	-44406
NDUFS8	4	0.77881	0.77999	0.999986	14942	1	-16613
TOPORS	4	0.98959	0.9896	0.999986	19127	0	-0.76694
FUNDC2	4	0.62223	0.66357	0.999986	12675	1	-16595
BFSP1	4	0.032649	0.084418	0.953766	1713	3	0.66214
PDC	4	0.77889	0.78007	0.999986	14946	1	-15441
FCER1G	4	0.97982	0.98002	0.999986	18897	0	-10835
CENPN	4	0.9837	0.98382	0.999986	18982	0	-20624
TSPAN13	4	0.5481	0.6209	0.999986	11836	1	-0.43852
BIN1	4	0.94395	0.94423	0.999986	18130	0	-11585
SOX5	4	0.99208	0.9921	0.999986	19190	0	-0.71246
PNPLA5	4	0.99204	0.99206	0.999986	19187	0	-11347
SRGN	4	0.72795	0.73703	0.999986	14110	1	-0.68025
COG1	4	0.88743	0.88763	0.999986	17060	0	-0.68107
NARS	4	0.99197	0.99198	0.999986	19185	0	-22583
KDSR	4	0.99197	0.99198	0.999986	19186	0	-22316
ZFPM2	4	0.99196	0.99198	0.999986	19184	0	-0.86906
SLC22A11	4	0.91595	0.91628	0.999986	17591	0	-0.47288
SLC12A6	4	0.60355	0.65225	0.999986	12457	1	-11084
NDUFAF4	4	0.9511	0.95136	0.999986	18288	0	-10715
KIR2DS4	4	0.9919	0.99192	0.999986	19183	0	-11354
RCC2	4	0.99189	0.99192	0.999986	19182	0	-0.71698
SEC22C	4	0.93986	0.94011	0.999986	18045	0	-0.52853
RNF114	4	0.88925	0.88943	0.999986	17100	0	-11399
COQ7	4	0.99185	0.99188	0.999986	19180	0	-0.83771
KCNT1	4	0.99184	0.99187	0.999986	19179	0	-0.60754
UBXN6	4	0.025146	0.068557	0.935891	1418	1	-10686
TNFSF18	4	0.46439	0.57877	0.999986	11025	1	-0.63217
ATP5C1	4	0.40444	0.5493	0.999986	10475	2	-11252
EPHA4	4	0.99171	0.99173	0.999986	19177	0	-0.95985
CC2D1B	4	0.54694	0.62027	0.999986	11822	1	-0.83941
CLPSL1	4	0.58305	0.64032	0.999986	12217	1	-0.3206
CLTA	4	0.98905	0.98904	0.999986	19113	0	-1646
MAPRE3	4	0.99168	0.99169	0.999986	19174	0	-10787
GEMIN4	4	0.99168	0.99169	0.999986	19176	0	-26181
SNRPF	4	0.99168	0.99169	0.999986	19175	0	-48378
TRMT112	4	0.63519	0.6716	0.999986	12842	1	-0.37686
DMC1	4	0.99159	0.99161	0.999986	19172	0	-0.81035
HLA-DOB	4	0.84615	0.84647	0.999986	16240	0	-10172
TMEM184B	4	0.81365	0.814	0.999986	15604	0	-22533
TEX19	4	0.99154	0.99155	0.999986	19171	0	-0.98198
FOXO4	4	0.39721	0.54143	0.999986	10345	2	0.10581
SYDE2	4	0.91976	0.92005	0.999986	17661	0	-10564
GIPC1	4	0.59732	0.64858	0.999986	12385	1	-15169
DPY30	4	0.99141	0.99142	0.999986	19168	0	-0.85216
CCL4	4	0.14235	0.26842	0.999986	5192	1	-17055
CD6	4	0.52914	0.61091	0.999986	11637	1	-0.35212
HSD17B3	4	0.99137	0.99138	0.999986	19167	0	-0.79655
RPS14	4	0.99137	0.99138	0.999986	19166	0	-37629
ADAMTSL1	4	0.99133	0.99135	0.999986	19165	0	-0.84636
TBC1D22A	4	0.82064	0.82097	0.999986	15758	0	-0.98017
UHRF1BP1	4	0.98351	0.98366	0.999986	18979	0	-0.92026
LRIT3	4	0.31882	0.45765	0.999986	8739	1	-0.59627
JAM3	4	0.99094	0.99097	0.999986	19157	0	-11179
SYTL4	4	0.95609	0.9563	0.999986	18403	0	-0.97871
PTGDS	4	0.24597	0.37969	0.999986	7252	1	-0.71351
PPP3R1	4	0.99127	0.99128	0.999986	19164	0	-0.92482
VRK2	4	0.70525	0.71955	0.999986	13765	1	-0.77823
CXXC1	4	0.99126	0.99127	0.999986	19163	0	-11025
Control_225	4	0.6653	0.6912	0.999986	13224	1	-0.90664
GPR68	4	0.93374	0.93402	0.999986	17936	0	-0.83703
PODXL	4	0.96823	0.96843	0.999986	18661	0	-11112
ARMCX2	4	0.9874	0.98741	0.999986	19079	0	-1344
ASMTL	4	0.016554	0.050085	0.921872	1045	1	-0.40241
ERCC8	4	0.27926	0.41527	0.999986	7941	1	-0.89073
GJA10	4	0.24313	0.37664	0.999986	7195	1	-0.68518
CENPO	4	0.99108	0.99109	0.999986	19162	0	-25911
KCNA4	4	0.99107	0.99108	0.999986	19161	0	-0.56479
CMYA5	4	0.99107	0.99108	0.999986	19160	0	-0.8841
WDR83	4	0.99106	0.99107	0.999986	19159	0	-17642
TGFB2	4	0.035393	0.090096	0.959317	1812	1	-13838
SEZ6L	4	0.87652	0.87681	0.999986	16845	0	-0.58523
NUP88	4	0.18883	0.31837	0.999986	6111	1	-3541
ZHX1-C8orf76	4	0.26003	0.39464	0.999986	7532	2	-0.3077
PCDH8	4	0.86051	0.86089	0.999986	16512	0	-12764
OR5B12	4	0.77024	0.77214	0.999986	14791	1	-0.22831
JAK3	4	0.21662	0.3483	0.999986	6646	2	-0.86613
SHISA7	4	0.88297	0.88325	0.999986	16969	0	-0.80806
PIDD1	4	0.93955	0.9398	0.999986	18038	0	-1178
TMEM144	4	0.84193	0.84228	0.999986	16167	0	-0.95646
CCDC137	4	0.99086	0.99089	0.999986	19156	0	-32935
CD244	4	0.47534	0.58406	0.999986	11132	1	-0.57639
SERINC4	4	0.98887	0.98887	0.999986	19108	0	-12933
GIP	4	0.72117	0.73164	0.999986	14019	1	-1307
OR10A5	4	0.27473	0.41041	0.999986	7842	1	-0.17896
IGSF8	4	0.99076	0.99078	0.999986	19155	0	-13563
LDHC	4	0.99075	0.99077	0.999986	19154	0	-0.54796
LDHA	4	0.6982	0.7144	0.999986	13660	1	-13847
STRADA	4	0.99071	0.99074	0.999986	19153	0	-0.71204
ARFGAP3	4	0.83785	0.83815	0.999986	16085	0	-0.64596
SNRPB	4	0.9907	0.99074	0.999986	19152	0	-19857
CSNK1D	4	0.9894	0.98941	0.999986	19119	0	-34009
ADGRV1	4	0.99067	0.9907	0.999986	19151	0	-0.95119
C4orf47	4	0.26107	0.39577	0.999986	7548	2	-0.073699
ISCA2	4	0.99065	0.99068	0.999986	19149	0	-12868
TYW1	4	0.25678	0.39114	0.999986	7472	1	-11007
ABHD16B	4	0.34294	0.48345	0.999986	9234	2	-0.17507
UPF2	4	0.9906	0.99062	0.999986	19148	0	-31823
RAD51D	4	0.69321	0.71069	0.999986	13590	1	-0.072625
OR5H6	4	0.99055	0.99058	0.999986	19147	0	-0.8013
RBM33	4	0.9706	0.97081	0.999986	18711	0	-15418
GINS4	4	0.91041	0.91073	0.999986	17497	0	-43378
FABP1	4	0.075183	0.16855	0.990178	3295	1	-0.77251
RYR2	4	0.68774	0.70669	0.999986	13519	1	-0.90541
NUP205	4	0.99049	0.99052	0.999986	19146	0	-14209
QSER1	4	0.99047	0.9905	0.999986	19145	0	-0.69233
DMTF1	4	0.99046	0.99049	0.999986	19144	0	-0.71892
GRXCR1	4	0.87835	0.87866	0.999986	16883	0	-0.71251
CIDEA	4	0.68305	0.70336	0.999986	13464	1	-12977
WWP2	4	0.92445	0.92473	0.999986	17761	0	-0.97195
NDST2	4	0.9904	0.99043	0.999986	19143	0	-0.82163
TBC1D30	4	0.317	0.45569	0.999986	8683	1	-11021
OR14I1	4	0.99037	0.9904	0.999986	19142	0	-0.65245
SEC13	4	0.47557	0.58418	0.999986	11137	1	-10071
COL4A1	4	0.78862	0.78925	0.999986	15108	1	-0.62653
RAB25	4	0.64812	0.67983	0.999986	13017	1	-0.73956
IFI27L2	4	0.15519	0.28228	0.999986	5445	2	0.16754
CCS	4	0.9903	0.99033	0.999986	19140	0	-11263
COG7	4	0.29591	0.43314	0.999986	8265	2	0.62242
NAGA	4	0.78123	0.78229	0.999986	14984	1	-0.95183
CWC15	4	0.60659	0.65405	0.999986	12495	1	-10617
TYRO3	4	0.2361	0.36921	0.999986	7044	1	-0.33324
RAB26	4	0.99014	0.99015	0.999986	19139	0	-10829
C1orf111	4	0.94973	0.94994	0.999986	18255	0	-12481
ZAP70	4	0.9901	0.99011	0.999986	19138	0	-0.95142
TAP2	4	0.010111	0.033857	0.912258	702	1	-0.51509
DPY19L2	4	0.85877	0.85913	0.999986	16474	0	-0.83051
NUP160	4	0.7519	0.75641	0.999986	14475	1	-54136
FNTB	4	0.99005	0.99006	0.999986	19136	0	-16283
COG4	4	0.99005	0.99006	0.999986	19137	0	-27465
GMEB1	4	0.67652	0.69878	0.999986	13375	1	-0.42451
USP19	4	0.99003	0.99004	0.999986	19135	0	-0.87812
DIP2A	4	0.015227	0.047162	0.921872	981	1	-0.41863
C2orf71	4	0.63423	0.67101	0.999986	12836	1	-0.8636
EDN3	4	0.73155	0.73984	0.999986	14168	1	-0.14211
P2RX4	4	0.76575	0.76815	0.999986	14700	1	-15581
TMEM254	4	0.26743	0.4025	0.999986	7675	1	-0.78686
MYZAP	4	0.98989	0.98989	0.999986	19133	0	-0.79359
AHDC1	4	0.13038	0.25545	0.999776	4926	2	0.35311
WDR26	4	0.97555	0.97576	0.999986	18811	0	-12221
Control_229	4	0.73725	0.74438	0.999986	14259	1	-0.61462
LMOD2	4	0.98982	0.98981	0.999986	19132	0	-0.88418
TTC5	4	0.79939	0.79978	0.999986	15307	1	-0.89433
MMP17	4	0.2135	0.34491	0.999986	6582	2	-0.85799
ADNP2	4	0.87023	0.87052	0.999986	16713	0	-0.42055
MRPL18	4	0.98978	0.98977	0.999986	19131	0	-18775
SERPINB9	4	0.98975	0.98975	0.999986	19130	0	-1038
CDK18	4	0.97952	0.9797	0.999986	18891	0	-10215
CLCA1	4	0.9133	0.91362	0.999986	17546	0	-0.93484
IGLON5	4	0.82321	0.82356	0.999986	15810	0	-0.86173
USPL1	4	0.10573	0.22487	0.996885	4365	1	-13768
PEX3	4	0.62615	0.66596	0.999986	12722	1	-37299
DUSP23	4	0.5542	0.62419	0.999986	11898	1	-10129
DDX5	4	0.98462	0.98474	0.999986	19001	0	-12683
OR8B2	4	0.82297	0.82333	0.999986	15804	0	-0.98813
GNPNAT1	4	0.98964	0.98966	0.999986	19128	0	-0.92321
ATL2	4	0.69977	0.7156	0.999986	13688	1	-31448
TMEM151B	4	0.3835	0.52675	0.999986	10083	1	-0.93861
ANG	4	0.014001	0.044464	0.918051	937	1	-19481
OR10H3	4	0.64723	0.67925	0.999986	13000	1	-13504
TIMM17A	4	0.98957	0.98958	0.999986	19126	0	-0.85921
LRCH4	4	0.23838	0.37161	0.999986	7092	1	-0.50578
RNH1	4	0.98953	0.98953	0.999986	19124	0	-0.76594
OXTR	4	0.0095742	0.032219	0.912258	666	3	0.82763
Control_103	4	0.98948	0.98949	0.999986	19123	0	-0.73451
PCYT1A	4	0.98948	0.98949	0.999986	19122	0	-37139
PITX1	4	0.83046	0.83079	0.999986	15951	0	-1762
RAB3GAP2	4	0.82954	0.82984	0.999986	15933	0	-12493
TRIM17	4	0.41577	0.55645	0.999986	10619	1	-0.76034
FAM212A	4	0.98943	0.98944	0.999986	19121	0	-10079
CCDC178	4	0.15934	0.28667	0.999986	5523	2	-0.75348
RPL23	4	0.96213	0.96234	0.999986	18540	0	-16834
LCN1	4	0.93775	0.93799	0.999986	18008	0	-21758
RNF217	4	0.66612	0.69173	0.999986	13234	1	-0.71725
KRTAP8-1	4	0.36414	0.50606	0.999986	9679	2	-0.52059
DRAM1	4	0.37287	0.51533	0.999986	9853	1	-0.82605
THSD4	4	0.98932	0.98932	0.999986	19118	0	-0.61972
CDIPT	4	0.93438	0.93466	0.999986	17948	0	-22153
XPNPEP3	4	0.9893	0.9893	0.999986	19117	0	-11489
SPRED3	4	0.81321	0.81355	0.999986	15594	0	-0.6196
L1CAM	4	0.44731	0.57068	0.999986	10884	1	-10396
PRUNE2	4	0.98927	0.98926	0.999986	19116	0	-0.83509
FNDC3B	4	0.11061	0.23366	0.998384	4522	1	-1406
CFAP43	4	0.94099	0.94122	0.999986	18060	0	-0.92739
CDRT15L2	4	0.849	0.84935	0.999986	16283	0	-0.569
SULT1B1	4	0.74277	0.74887	0.999986	14339	1	-11004
TLR3	4	0.72402	0.73392	0.999986	14058	1	-22967
GRIA4	4	0.83387	0.83417	0.999986	16008	0	-0.39323
LSM4	4	0.3412	0.48161	0.999986	9201	1	-2005
COG5	4	0.9834	0.98354	0.999986	18978	0	-33096
CNOT10	4	0.98914	0.98914	0.999986	19115	0	-0.97155
CEP104	4	0.95393	0.95417	0.999986	18355	0	-12029
FGD6	4	0.73915	0.74593	0.999986	14286	1	-11135
MRGPRD	4	0.98911	0.98911	0.999986	19114	0	-0.88221
RPP21	4	0.98638	0.98643	0.999986	19052	0	-20913
ZNF436	4	0.93819	0.93842	0.999986	18017	0	-0.25209
ROBO1	4	0.84739	0.84774	0.999986	16265	0	-29059
OR4D5	4	0.98903	0.98902	0.999986	19112	0	-0.52111
PRR9	4	0.88237	0.88267	0.999986	16956	0	-0.74405
HEATR5A	4	0.65603	0.68505	0.999986	13110	1	-10477
ITGAE	4	0.98902	0.98901	0.999986	19111	0	-0.85411
PPP1CA	4	0.40356	0.54836	0.999986	10455	1	-0.74502
PNPLA8	4	0.029673	0.078191	0.945271	1600	3	0.66177
NSMCE1	4	0.98895	0.98895	0.999986	19110	0	-29927
IL17D	4	0.98893	0.98893	0.999986	19109	0	-0.68956
TMEM174	4	0.055482	0.13044	0.982162	2565	3	0.55409
HMCES	4	0.87243	0.87273	0.999986	16759	0	-0.69662
KCNE1	4	0.2162	0.34787	0.999986	6634	1	-0.44014
PLXNB2	4	0.50084	0.59646	0.999986	11373	1	-13483
CHKB	4	0.98882	0.98882	0.999986	19106	0	-12708
UGT2B15	4	0.69905	0.71504	0.999986	13673	1	-0.65682
LYRM7	4	0.79185	0.79235	0.999986	15167	1	-0.50357
NOX4	4	0.98879	0.98879	0.999986	19105	0	-0.63486
IZUMO4	4	0.3761	0.5188	0.999986	9923	1	-0.77843
PTPRS	4	0.8844	0.88466	0.999986	16995	0	-13889
GCH1	4	0.97478	0.97496	0.999986	18801	0	-10253
OR6F1	4	0.97928	0.9795	0.999986	18887	0	-0.7058
USP50	4	0.94197	0.94225	0.999986	18098	0	-10463
DPH5	4	0.96641	0.96663	0.999986	18631	0	-17849
TBRG4	4	0.98873	0.98872	0.999986	19103	0	-10506
ZNF658	4	0.50396	0.598	0.999986	11403	1	-22577
EOGT	4	0.85438	0.85478	0.999986	16391	0	-10594
GALK1	4	0.69404	0.71131	0.999986	13599	1	-13108
MAP4K2	4	0.97603	0.97626	0.999986	18816	0	-0.62718
ZSWIM6	4	0.98864	0.98863	0.999986	19102	0	-0.65802
DUSP21	4	0.98861	0.98861	0.999986	19101	0	-0.98619
PRKD3	4	0.11924	0.24341	0.999721	4712	1	-10944
SIPA1	4	0.52573	0.60916	0.999986	11607	1	-0.69373
ICAM1	4	0.27688	0.41269	0.999986	7889	1	-0.63097
CD5	4	0.6035	0.65222	0.999986	12455	1	-0.72333
TPRA1	4	0.10226	0.21856	0.996885	4231	1	-0.68858
TAPBP	4	0.30167	0.43932	0.999986	8382	2	-0.81145
P4HA1	4	0.85536	0.85577	0.999986	16407	0	-0.9956
MRPS10	4	0.94412	0.9444	0.999986	18134	0	-11472
FA2H	4	0.079785	0.17717	0.992961	3451	2	-0.63163
SLC9A8	4	0.67182	0.69556	0.999986	13309	1	-0.86931
TGS1	4	0.16043	0.28786	0.999986	5555	1	-13784
USP17L29	4	0.98846	0.98847	0.999986	19100	0	-47819
SOX1	4	0.21448	0.346	0.999986	6602	1	-0.51028
AVPR1B	4	0.92018	0.92047	0.999986	17671	0	-0.79753
SLC26A3	4	0.98842	0.98843	0.999986	19099	0	-0.95445
KANSL2	4	0.94438	0.94466	0.999986	18141	0	-11667
ITGAX	4	0.27221	0.40767	0.999986	7788	2	-0.045759
RFPL2	4	0.90264	0.9029	0.999986	17350	0	-0.18364
AKAP5	4	0.67314	0.69646	0.999986	13326	1	-0.90054
GPHB5	4	0.093363	0.20234	0.996885	3921	1	-0.92397
PRAMEF5	4	0.031818	0.082688	0.951422	1682	1	-36993
LRRC74B	4	0.57142	0.63376	0.999986	12088	1	-0.55463
TIMM8A	4	0.9546	0.95483	0.999986	18370	0	-0.87714
LRRD1	4	0.98818	0.9882	0.999986	19098	0	-0.69243
EPM2A	4	0.38334	0.52656	0.999986	10080	1	-11022
PPFIBP1	4	0.59326	0.64625	0.999986	12338	1	-0.5535
Control_140	4	0.048694	0.11703	0.967013	2340	2	-0.050594
MRPL9	4	0.90389	0.90413	0.999986	17370	0	-0.77747
ASZ1	4	0.98814	0.98815	0.999986	19097	0	-0.78662
CACNA1C	4	0.98813	0.98814	0.999986	19096	0	-0.58806
Control_14	4	0.094706	0.20484	0.996885	3966	2	-0.079873
GJD2	4	0.54508	0.61925	0.999986	11799	1	-10374
AIFM1	4	0.98806	0.98807	0.999986	19094	0	-0.61374
RNF222	4	0.1939	0.32383	0.999986	6207	2	0.084449
PYCR1	4	0.84445	0.84476	0.999986	16210	0	-15578
THAP7	4	0.36254	0.50437	0.999986	9650	1	-11593
TRMT10C	4	0.93898	0.93921	0.999986	18025	0	-10141
MYH1	4	0.95524	0.95544	0.999986	18382	0	-0.88945
PIAS3	4	0.98797	0.98799	0.999986	19093	0	-16385
HOXB1	4	0.68284	0.7032	0.999986	13461	1	-14602
OLIG2	4	0.88203	0.88233	0.999986	16946	0	-11798
MTOR	4	0.8732	0.87352	0.999986	16775	0	-11622
CPM	4	0.98446	0.98459	0.999986	18998	0	-11091
SPIN3	4	0.87883	0.87913	0.999986	16889	0	-0.25719
RGP1	4	0.53545	0.61414	0.999986	11696	1	-14469
GSTO2	4	0.93337	0.93365	0.999986	17927	0	-0.83409
SGK1	4	0.92526	0.92553	0.999986	17773	0	-0.83025
ARID1A	4	0.80886	0.80921	0.999986	15503	0	-0.93977
ALOX12B	4	0.98784	0.98786	0.999986	19092	0	-0.69781
TMEM170A	4	0.79902	0.79939	0.999986	15301	1	-0.037885
DCTN6	4	0.98783	0.98785	0.999986	19091	0	-27993
HLA-DRA	4	0.98112	0.98132	0.999986	18927	0	-0.85922
NICN1	4	0.98779	0.9878	0.999986	19090	0	-0.77312
GPRC5B	4	0.74493	0.75064	0.999986	14371	1	-0.85054
HELLS	4	0.98778	0.98779	0.999986	19089	0	-13835
RAD50	4	0.98777	0.98778	0.999986	19088	0	-0.72463
S100A10	4	0.93951	0.93976	0.999986	18037	0	-10659
SLC22A9	4	0.86284	0.86318	0.999986	16556	0	-0.61001
LOC100289561	4	0.26613	0.40118	0.999986	7647	2	-0.51966
PRKDC	4	0.98773	0.98774	0.999986	19087	0	-18186
TRMT44	4	0.79894	0.79931	0.999986	15299	1	-11002
CDPF1	4	0.95999	0.96023	0.999986	18497	0	-0.64697
ZNF358	4	0.98767	0.98769	0.999986	19086	0	-0.94754
MBD1	4	0.98767	0.98768	0.999986	19085	0	-0.53203
CCT7	4	0.98766	0.98767	0.999986	19084	0	-40212
IGHMBP2	4	0.0044052	0.01541	0.865623	341	3	11169
QRICH1	4	0.98763	0.98764	0.999986	19083	0	-16563
PIR	4	0.1174	0.24142	0.999721	4673	2	-0.50888
RNASE4	4	0.12966	0.25467	0.999776	4907	1	-0.90949
EDIL3	4	0.72407	0.73395	0.999986	14059	1	-10501
EMP1	4	0.80938	0.80972	0.999986	15512	0	-0.54788
CSMD2	4	0.18059	0.30951	0.999986	5944	1	-1151
TNFRSF11B	4	0.98757	0.98758	0.999986	19082	0	-0.64065
TLR8	4	0.69925	0.71519	0.999986	13676	1	-11738
AICDA	4	0.91994	0.92023	0.999986	17665	0	-0.9854
ETNK1	4	0.96994	0.97014	0.999986	18696	0	-12983
RBBP4	4	0.98746	0.98747	0.999986	19081	0	-0.94426
OR11L1	4	0.7943	0.79473	0.999986	15213	1	-0.3488
OR11H12	4	0.92892	0.92917	0.999986	17840	0	-0.74885
ZFC3H1	4	0.98742	0.98743	0.999986	19080	0	-21264
FCGRT	4	0.30987	0.44806	0.999986	8554	1	-10137
STX12	4	0.98739	0.98741	0.999986	19078	0	-0.68024
OR52W1	4	0.98739	0.9874	0.999986	19077	0	-0.5742
C9orf43	4	0.93845	0.93867	0.999986	18019	0	-0.95366
CHPF2	4	0.95891	0.95913	0.999986	18468	0	-0.50144
SIX5	4	0.16111	0.28859	0.999986	5566	1	-0.80259
ANKRD13D	4	0.79447	0.79489	0.999986	15215	1	-13398
ZSWIM8	4	0.98735	0.98736	0.999986	19076	0	-0.81775
ADARB1	4	0.20648	0.3374	0.999986	6450	1	-0.65255
APCDD1L	4	0.98732	0.98733	0.999986	19074	0	-11046
KCNH1	4	0.46878	0.58089	0.999986	11065	1	-0.79796
ZNF609	4	0.41473	0.55597	0.999986	10613	1	-0.89458
RELA	4	0.37295	0.51543	0.999986	9857	2	-0.41919
C19orf71	4	0.98728	0.9873	0.999986	19073	0	-0.84439
PCSK4	4	0.93259	0.93286	0.999986	17914	0	-0.70981
POLR1A	4	0.85778	0.85815	0.999986	16454	0	-39471
DST	4	0.53197	0.61236	0.999986	11665	1	-0.5511
FAM21C	4	0.97897	0.97917	0.999986	18881	0	-16623
2003-09-01	4	0.50096	0.59651	0.999986	11375	1	0.097926
SERPINI2	4	0.76679	0.76911	0.999986	14725	1	-0.45964
KCNJ4	4	0.84691	0.84726	0.999986	16253	0	-11274
EIF4E2	4	0.98722	0.98723	0.999986	19071	0	-0.89921
TOX	4	0.15886	0.28617	0.999986	5514	2	0.35467
KRT18	4	0.98716	0.98717	0.999986	19070	0	-12019
RCAN2	4	0.9782	0.97839	0.999986	18860	0	-0.85509
GNAS	4	0.61936	0.66178	0.999986	12644	1	-0.56408
MYCBPAP	4	0.98709	0.9871	0.999986	19069	0	-0.85561
PSMA4	4	0.92324	0.92356	0.999986	17743	0	-1435
PIK3R1	4	0.5472	0.62042	0.999986	11824	1	-0.86212
TMEM154	4	0.083001	0.18318	0.993504	3560	1	-10625
UGT2B17	4	0.53064	0.61168	0.999986	11649	1	-0.26513
ADCY4	4	0.75654	0.76034	0.999986	14559	1	-14911
TFB1M	4	0.77081	0.77264	0.999986	14802	1	-0.71832
MLXIPL	4	0.72742	0.73661	0.999986	14105	1	-1223
TMEM79	4	0.98703	0.98704	0.999986	19068	0	-12679
ANKRD27	4	0.20336	0.33405	0.999986	6382	2	0.33512
NOS1AP	4	0.98701	0.98702	0.999986	19067	0	-14812
Control_205	4	0.077714	0.17325	0.992435	3378	1	-0.3357
TUBB	4	0.9702	0.97041	0.999986	18701	0	-21154
RNF169	4	0.94197	0.94225	0.999986	18075	0	-13303
ZNF556	4	0.98373	0.98385	0.999986	18983	0	-10231
MIP	4	0.17983	0.30869	0.999986	5929	1	-14168
ZDHHC9	4	0.47307	0.58295	0.999986	11112	1	-0.75226
ATP5A1	4	0.98697	0.98699	0.999986	19066	0	-17117
KLF5	4	0.8214	0.82175	0.999986	15770	0	-0.90677
TRIB1	4	0.98696	0.98698	0.999986	19065	0	-0.77148
ZNF74	4	0.98695	0.98697	0.999986	19064	0	-0.59204
PIANP	4	0.98694	0.98696	0.999986	19063	0	-12906
SLC16A3	4	0.58107	0.6392	0.999986	12201	1	-0.7588
SMARCC2	4	0.88171	0.882	0.999986	16944	0	-12262
CAMKMT	4	0.69905	0.71504	0.999986	13674	1	-1001
C17orf85	4	0.98688	0.9869	0.999986	19062	0	-0.75011
PLGRKT	4	0.32388	0.46307	0.999986	8838	1	-0.49016
ORAI2	4	0.71049	0.72348	0.999986	13845	1	-0.25397
SMTN	4	0.047801	0.11527	0.967013	2296	1	-0.42176
IRAK1BP1	4	0.24773	0.38158	0.999986	7286	1	-0.84653
MMP12	4	0.81519	0.81552	0.999986	15645	0	-0.531
CLEC2A	4	0.11627	0.24021	0.999721	4648	2	-0.69907
C2CD4A	4	0.74013	0.74672	0.999986	14305	1	-0.72144
GJB1	4	0.76919	0.77123	0.999986	14770	1	-11731
LCE3C	4	0.97031	0.97053	0.999986	18705	0	-11995
LGI3	4	0.90923	0.90954	0.999986	17468	0	-0.72379
PRAMEF7	4	0.97368	0.97387	0.999986	18773	0	-0.75018
APOL5	4	0.98108	0.98127	0.999986	18926	0	-13811
SRP14	4	0.98673	0.98676	0.999986	19060	0	-14542
SSX2	4	0.98672	0.98675	0.999986	19059	0	-1036
CACYBP	4	0.85996	0.86033	0.999986	16495	0	-11834
CCDC60	4	0.97598	0.97622	0.999986	18815	0	-15262
CD5L	4	0.98669	0.98672	0.999986	19058	0	-0.87943
NPY1R	4	0.95457	0.9548	0.999986	18369	0	-0.84534
PACS2	4	0.93427	0.93456	0.999986	17945	0	-14763
PHF20L1	4	0.80195	0.80233	0.999986	15359	1	-0.86716
ARAF	4	0.86114	0.86149	0.999986	16526	0	-0.95722
YY1AP1	4	0.98664	0.98667	0.999986	19057	0	-0.64291
NR2C1	4	0.77285	0.77449	0.999986	14840	1	-0.55707
HCRTR1	4	0.79861	0.79897	0.999986	15295	1	-0.32725
OR5M9	4	0.89799	0.89818	0.999986	17268	0	-0.33291
H1FNT	4	0.96181	0.96201	0.999986	18531	0	-11275
ZNF567	4	0.14625	0.27268	0.999986	5276	1	-0.54441
TMED10	4	0.95916	0.9594	0.999986	18473	0	-11517
KIRREL	4	0.98649	0.98654	0.999986	19056	0	-14637
FRYL	4	0.98649	0.98654	0.999986	19055	0	-0.56149
Control_98	4	0.70303	0.71793	0.999986	13735	1	-0.47957
SNAP47	4	0.073091	0.16459	0.988817	3218	3	0.3715
KLF8	4	0.98646	0.9865	0.999986	19053	0	-0.75391
PIGS	4	0.84417	0.84447	0.999986	16203	0	-10607
SRPK1	4	0.38343	0.52666	0.999986	10081	1	-0.62006
GGT1	4	0.95405	0.95429	0.999986	18357	0	-15306
ALCAM	4	0.90043	0.90066	0.999986	17310	0	-14877
LHX8	4	0.98636	0.98642	0.999986	19051	0	-0.63303
MAGEC2	4	0.90149	0.90177	0.999986	17332	0	-0.7805
CTSF	4	0.52576	0.60917	0.999986	11608	1	-0.25077
DHX29	4	0.4081	0.55303	0.999986	10548	1	-15984
CCL14	4	0.98628	0.98635	0.999986	19048	0	-0.81404
MYPN	4	0.98627	0.98634	0.999986	19047	0	-0.43758
SMCHD1	4	0.98626	0.98633	0.999986	19046	0	-0.92201
PLA2R1	4	0.98625	0.98632	0.999986	19045	0	-0.78648
SPRR2D	4	0.98623	0.9863	0.999986	19044	0	-0.80778
TIPARP	4	0.97414	0.97433	0.999986	18787	0	-18347
KLF15	4	0.50669	0.59938	0.999986	11428	1	-0.31557
CAMTA1	4	0.80208	0.80247	0.999986	15363	1	-12608
TIMD4	4	0.98619	0.98626	0.999986	19043	0	-0.76535
GUK1	4	0.98617	0.98624	0.999986	19042	0	-39683
KRTAP2-4	4	0.74674	0.75213	0.999986	14400	1	-12487
C14orf28	4	0.0026108	0.0093439	0.838344	207	3	10723
TUSC1	4	0.98613	0.9862	0.999986	19041	0	-0.76093
FAM134C	4	0.10359	0.22092	0.996885	4281	2	0.13933
MORC3	4	0.17246	0.30078	0.999986	5776	1	-0.36866
SPINK2	4	0.96351	0.96371	0.999986	18574	0	-16432
NLRP10	4	0.16873	0.29677	0.999986	5708	1	-0.81171
SLC36A4	4	0.98606	0.98613	0.999986	19040	0	-0.4787
COMT	4	0.72632	0.73573	0.999986	14090	1	-12341
GPR35	4	0.67506	0.69775	0.999986	13355	1	-11911
C2orf73	4	0.12409	0.24864	0.999776	4796	2	-0.38776
SLC16A11	4	0.17533	0.30388	0.999986	5840	1	-0.35311
TRIM54	4	0.57854	0.63782	0.999986	12164	1	-11694
ZSCAN29	4	0.98595	0.98603	0.999986	19039	0	-0.76087
MCC	4	0.64346	0.67683	0.999986	12951	1	-15403
MFSD9	4	0.98595	0.98602	0.999986	19038	0	-0.71323
POFUT2	4	0.21405	0.34552	0.999986	6592	1	-0.8395
OR1S1	4	0.24809	0.38198	0.999986	7297	2	-0.046047
COL5A1	4	0.41347	0.55541	0.999986	10601	1	-1187
MPEG1	4	0.98588	0.98595	0.999986	19037	0	-0.51299
MYO1C	4	0.98587	0.98594	0.999986	19036	0	-13469
ANXA9	4	0.98582	0.9859	0.999986	19035	0	-10431
GNRHR	4	0.98581	0.9859	0.999986	19034	0	-0.98376
RC3H2	4	0.98581	0.98589	0.999986	19033	0	-0.58756
HNRNPH3	4	0.58948	0.64404	0.999986	12291	1	-11663
Control_75	4	0.25566	0.38996	0.999986	7445	1	-0.79422
MARK3	4	0.8964	0.89663	0.999986	17237	0	-12289
POC1B	4	0.46536	0.5792	0.999986	11035	1	-0.32351
RPS11	4	0.98574	0.98583	0.999986	19032	0	-41799
GID8	4	0.91608	0.91641	0.999986	17592	0	-19953
DNTTIP2	4	0.62422	0.66478	0.999986	12698	1	-16942
MAN2C1	4	0.95871	0.95894	0.999986	18459	0	-17359
P3H1	4	0.028278	0.075287	0.945173	1539	3	0.76137
TRRAP	4	0.98568	0.98577	0.999986	19031	0	-3818
ASPN	4	0.60011	0.65021	0.999986	12419	1	-12809
DGKZ	4	0.30289	0.44063	0.999986	8412	1	-0.93308
KIF19	4	0.18923	0.3188	0.999986	6115	1	-14312
S1PR3	4	0.41236	0.55492	0.999986	10590	1	-0.97021
GABRB1	4	0.7729	0.77453	0.999986	14842	1	-0.95999
ZNF664	4	0.4018	0.54649	0.999986	10419	1	-0.30444
NUP93	4	0.98558	0.98567	0.999986	19030	0	-49886
MAGEA12	4	0.025349	0.069015	0.93611	1427	2	-0.41134
SAMD13	4	0.98556	0.98565	0.999986	19029	0	-0.53996
KLF11	4	0.80757	0.80799	0.999986	15476	0	-10827
OR1M1	4	0.95744	0.95766	0.999986	18432	0	-0.88567
UBD	4	0.9855	0.98559	0.999986	19028	0	-14195
IRF7	4	0.9855	0.98559	0.999986	19027	0	-1139
NCDN	4	0.81495	0.81529	0.999986	15638	0	-0.69547
SAGE1	4	0.83326	0.83359	0.999986	15996	0	-0.3308
APOH	4	0.31091	0.44917	0.999986	8571	2	-0.55156
SF3B2	4	0.93339	0.93368	0.999986	17928	0	-18463
TMEM238	4	0.098919	0.21248	0.996885	4115	3	0.37611
HSPA1A	4	0.95214	0.95241	0.999986	18316	0	-10497
KRTAP4-9	4	0.98529	0.98539	0.999986	19026	0	-0.51079
FGFR2	4	0.48177	0.58712	0.999986	11186	1	-0.2704
TNRC6C	4	0.082081	0.1815	0.993504	3530	1	-0.46314
EIF3D	4	0.98527	0.98538	0.999986	19025	0	-48008
CCER1	4	0.98527	0.98538	0.999986	19024	0	-13966
XIAP	4	0.98525	0.98536	0.999986	19023	0	-0.48844
TAC1	4	0.1935	0.32341	0.999986	6201	1	-0.86287
TMEM138	4	0.71182	0.72447	0.999986	13869	1	-0.76718
PLXNA3	4	0.17894	0.30773	0.999986	5913	1	-0.63698
2007-03-01	4	0.22699	0.35948	0.999986	6857	1	-0.33896
OR10A6	4	0.95826	0.95849	0.999986	18452	0	-12172
EVPLL	4	0.63894	0.67397	0.999986	12890	1	-13304
SNAP23	4	0.79827	0.79865	0.999986	15289	1	-0.75428
CTSC	4	0.34139	0.48183	0.999986	9206	1	-0.75496
PI4KA	4	0.064923	0.14879	0.983007	2931	3	0.70659
OAS3	4	0.98503	0.98515	0.999986	19021	0	-0.81636
GSG1L	4	0.7974	0.79777	0.999986	15277	1	-13188
TIMM17B	4	0.69658	0.71318	0.999986	13635	1	-0.85705
PHF8	4	0.80253	0.80292	0.999986	15373	1	-15242
CHRNA4	4	0.84711	0.84745	0.999986	16261	0	-0.56555
MED14OS	4	0.98498	0.9851	0.999986	19020	0	-0.7074
CTU1	4	0.31451	0.45306	0.999986	8642	2	0.20397
NUP210	4	0.98498	0.98509	0.999986	19019	0	-11411
MACROD1	4	0.76074	0.76387	0.999986	14617	1	-0.77643
MYLK2	4	0.98494	0.98506	0.999986	19018	0	-0.82312
ITGB4	4	0.98493	0.98505	0.999986	19017	0	-0.75836
TMEM132C	4	0.95419	0.95443	0.999986	18360	0	-17207
PLTP	4	0.98492	0.98504	0.999986	19016	0	-0.86418
CTF1	4	0.9849	0.98502	0.999986	19015	0	-0.56624
ATAD3C	4	0.98489	0.98501	0.999986	19014	0	-13466
PIK3CD	4	0.39005	0.53374	0.999986	10215	2	-0.54721
C19orf60	4	0.98489	0.98501	0.999986	19013	0	-0.98327
BAG3	4	0.98488	0.985	0.999986	19012	0	-0.68561
SLC25A48	4	0.98488	0.985	0.999986	19011	0	-0.72068
HNRNPA1	4	0.61953	0.66191	0.999986	12646	1	-0.9812
ZCCHC17	4	0.98486	0.98498	0.999986	19010	0	-0.76057
COPB1	4	0.89734	0.89755	0.999986	17256	0	-17476
TOMM40	4	0.98484	0.98496	0.999986	19009	0	-1331
ATM	4	0.47835	0.58551	0.999986	11159	1	-0.43035
PDCD7	4	0.98481	0.98494	0.999986	19008	0	-32252
ATG101	4	0.98479	0.98492	0.999986	19007	0	-0.65054
DHX15	4	0.8949	0.89507	0.999986	17213	0	-58087
MAGEA10-MAGEA5	4	0.98476	0.9849	0.999986	19006	0	-15909
TBC1D8B	4	0.98476	0.98489	0.999986	19005	0	-0.73313
DNAJB4	4	0.80971	0.81005	0.999986	15523	0	-0.88203
HBEGF	4	0.98473	0.98486	0.999986	19004	0	-0.6379
SNW1	4	0.65827	0.68648	0.999986	13142	1	-0.58276
VWA8	4	0.9847	0.98483	0.999986	19003	0	-0.87138
C14orf37	4	0.98469	0.98482	0.999986	19002	0	-0.79831
OMG	4	0.81235	0.81269	0.999986	15574	0	-0.13535
TBCB	4	0.9806	0.98082	0.999986	18911	0	-12067
OR2V1	4	0.97392	0.97411	0.999986	18781	0	-20225
APOL1	4	0.10843	0.22983	0.99719	4459	1	-0.60935
SOWAHB	4	0.97447	0.97465	0.999986	18794	0	-14408
RRH	4	0.20378	0.33449	0.999986	6388	1	-0.90582
VPS54	4	0.6614	0.68854	0.999986	13179	1	-0.95746
NEK9	4	0.85933	0.85966	0.999986	16485	0	-0.88432
TSPAN3	4	0.078596	0.17492	0.992435	3404	2	0.25867
PCGF2	4	0.98449	0.98462	0.999986	19000	0	-0.91688
FMNL3	4	0.98447	0.9846	0.999986	18999	0	-0.70999
SLC25A27	4	0.96808	0.96828	0.999986	18658	0	-0.91989
SFXN5	4	0.98198	0.98218	0.999986	18951	0	-12088
AKAP8	4	0.98442	0.98456	0.999986	18997	0	-0.84403
C17orf80	4	0.052849	0.1252	0.980769	2468	3	0.52103
DOCK8	4	0.98441	0.98455	0.999986	18996	0	-0.71254
RC3H1	4	0.069079	0.15689	0.987261	3074	2	-0.34534
LIX1	4	0.36816	0.51023	0.999986	9763	1	-10212
OTUD7A	4	0.21334	0.34475	0.999986	6579	2	0.34907
CABIN1	4	0.56583	0.63064	0.999986	12018	1	-0.76216
RNASE3	4	0.95004	0.95025	0.999986	18265	0	-0.65697
ASPDH	4	0.9843	0.98443	0.999986	18994	0	-0.51959
ATG7	4	0.97634	0.97657	0.999986	18822	0	-22847
STOML2	4	0.55424	0.62421	0.999986	11899	1	-16548
KLC3	4	0.83642	0.83673	0.999986	16050	0	-0.92428
NOBOX	4	0.72212	0.7324	0.999986	14037	1	-10468
CADM1	4	0.98424	0.98437	0.999986	18993	0	-0.38764
CBR1	4	0.86553	0.86583	0.999986	16608	0	-0.75036
PCDHGA10	4	0.84271	0.84303	0.999986	16182	0	-13518
TNKS2	4	0.98419	0.98432	0.999986	18992	0	-0.44697
VPS39	4	0.78376	0.7847	0.999986	15022	1	-0.59735
HHIP	4	0.98412	0.98427	0.999986	18991	0	-16476
NAPA	4	0.66808	0.693	0.999986	13266	1	-18358
RANBP2	4	0.98411	0.98426	0.999986	18990	0	-0.79535
C4orf19	4	0.27641	0.41218	0.999986	7878	2	0.24462
PTPRZ1	4	0.56145	0.62817	0.999986	11971	1	-0.86231
KIAA1033	4	0.98409	0.98423	0.999986	18989	0	-10373
KRT25	4	0.97418	0.97437	0.999986	18788	0	-10389
NOL6	4	0.98401	0.98414	0.999986	18988	0	-31671
KLHL35	4	0.42014	0.55836	0.999986	10653	1	-0.80529
ZC3H8	4	0.76378	0.76646	0.999986	14669	1	-17842
ELK1	4	0.98396	0.9841	0.999986	18987	0	-23153
MTERF4	4	0.098965	0.21255	0.996885	4116	1	-13184
SP1	4	0.88446	0.88471	0.999986	16996	0	-0.6696
AWAT1	4	0.10659	0.22645	0.99719	4392	3	0.51426
PCF11	4	0.8582	0.85856	0.999986	16465	0	-11637
YTHDC1	4	0.29119	0.42807	0.999986	8177	1	-17076
ARID2	4	0.85574	0.85614	0.999986	16417	0	-0.57662
GIMAP1	4	0.77465	0.77613	0.999986	14876	1	-0.69561
RNF224	4	0.68095	0.70188	0.999986	13436	1	-0.69352
CYB5A	4	0.81343	0.81377	0.999986	15598	0	-0.64559
ZNF22	4	0.18703	0.31644	0.999986	6075	2	-0.16822
ACTN4	4	0.15167	0.27849	0.999986	5376	1	-17818
DPPA3	4	0.97652	0.97672	0.999986	18825	0	-11445
KLF13	4	0.98377	0.9839	0.999986	18985	0	-0.87231
OR1E2	4	0.91234	0.91265	0.999986	17531	0	-0.434
AGBL1	4	0.98375	0.98387	0.999986	18984	0	-0.38187
SSBP3	4	0.51387	0.60305	0.999986	11490	1	-0.84024
FAM69B	4	0.18697	0.31637	0.999986	6072	2	-0.04237
HSPA4L	4	0.9808	0.98101	0.999986	18918	0	-10046
FXR1	4	0.98367	0.98379	0.999986	18981	0	-0.69676
HNRNPLL	4	0.77092	0.77274	0.999986	14805	1	-10891
C1GALT1C1L	4	0.80513	0.80548	0.999986	15428	0	-0.83874
ZC3H12C	4	0.046114	0.11192	0.967013	2226	3	0.73254
HIST2H4A	4	0.69086	0.70899	0.999986	13560	1	-12719
IL18R1	4	0.98354	0.98367	0.999986	18980	0	-0.59761
SPAG7	4	0.54056	0.61685	0.999986	11752	1	-10287
KLHL34	4	0.74339	0.7494	0.999986	14350	1	-0.36483
GOLGA8N	4	0.098487	0.2117	0.996885	4105	1	-32606
EFNB1	4	0.19188	0.32167	0.999986	6164	2	-0.17978
SDHAF3	4	0.88389	0.88416	0.999986	16982	0	-19654
SMG7	4	0.58467	0.64128	0.999986	12235	1	-6.53
MZT2B	4	0.62563	0.66566	0.999986	12714	1	-16454
PATE1	4	0.12402	0.24856	0.999776	4794	1	-0.73994
SLC39A9	4	0.024133	0.066415	0.931557	1379	1	-14647
PCDH1	4	0.018072	0.053416	0.921872	1121	3	0.91313
SFXN2	4	0.98339	0.98354	0.999986	18977	0	-0.97267
INTS3	4	0.98337	0.98352	0.999986	18976	0	-10477
TBX2	4	0.0052839	0.018329	0.885033	400	1	-14032
MAGOH	4	0.88423	0.8845	0.999986	16991	0	-36586
NYAP1	4	0.98329	0.98344	0.999986	18975	0	-0.56376
WDR12	4	0.9192	0.91949	0.999986	17648	0	-2109
FBXO24	4	0.89758	0.89779	0.999986	17260	0	-0.42328
CLEC4A	4	0.85314	0.85351	0.999986	16366	0	-10348
2009-03-01	4	0.83361	0.83391	0.999986	16004	0	-0.51003
BUB3	4	0.9832	0.98334	0.999986	18974	0	-48238
SRPR	4	0.93264	0.93291	0.999986	17917	0	-11967
RDH16	4	0.272	0.40744	0.999986	7783	1	-0.86488
TAS2R8	4	0.97743	0.97761	0.999986	18843	0	-0.67335
SLC16A4	4	0.045599	0.11089	0.967013	2202	3	0.42245
HUWE1	4	0.98312	0.98326	0.999986	18973	0	-30691
DDX10	4	0.87734	0.87762	0.999986	16867	0	-1509
TREM2	4	0.9831	0.98324	0.999986	18972	0	-0.80564
PAK7	4	0.9831	0.98324	0.999986	18971	0	-0.699
RPL27A	4	0.98309	0.98324	0.999986	18970	0	-0.82973
MEGF9	4	0.90465	0.90487	0.999986	17385	0	-11071
IFT52	4	0.86085	0.86122	0.999986	16521	0	-0.40938
RNF44	4	0.85422	0.85462	0.999986	16388	0	-0.84703
RAD54L	4	0.64048	0.67493	0.999986	12902	1	-0.78008
AUH	4	0.88552	0.88574	0.999986	17015	0	-0.9055
MAMLD1	4	0.82339	0.82374	0.999986	15813	0	-10266
MTMR11	4	0.98301	0.98316	0.999986	18969	0	-0.65858
CD63	4	0.98297	0.98313	0.999986	18968	0	-0.54416
PPP1R9B	4	0.81694	0.81729	0.999986	15681	0	-14313
PPEF2	4	0.71994	0.73071	0.999986	13998	1	-0.7969
MYCN	4	0.62496	0.66524	0.999986	12709	1	-11385
DMBT1	4	0.98291	0.98307	0.999986	18967	0	-0.97195
VIPAS39	4	0.61326	0.65806	0.999986	12567	1	-0.64199
RASGRF2	4	0.085467	0.18771	0.994489	3655	1	-1.18
NAT8L	4	0.80268	0.80308	0.999986	15379	1	-0.48746
OR6A2	4	0.41193	0.55474	0.999986	10585	1	-0.30819
THEGL	4	0.23774	0.37095	0.999986	7081	2	-10235
FAM78B	4	0.32273	0.46183	0.999986	8817	2	-0.71989
PPIP5K2	4	0.98283	0.98298	0.999986	18966	0	-10696
OSM	4	0.98113	0.98132	0.999986	18928	0	-10167
MTDH	4	0.98281	0.98296	0.999986	18965	0	-11389
CD59	4	0.06432	0.1476	0.982162	2905	2	0.26228
SPNS3	4	0.98277	0.98292	0.999986	18964	0	-0.59803
MKLN1	4	0.78854	0.78918	0.999986	15104	1	-1.72
ACSF2	4	0.98273	0.98289	0.999986	18963	0	-0.85647
NDUFB5	4	0.15603	0.2832	0.999986	5456	1	-12022
CENPF	4	0.96817	0.96837	0.999986	18660	0	-12122
TMEM171	4	0.58814	0.64329	0.999986	12276	1	-0.070387
ZNF215	4	0.94548	0.94576	0.999986	18156	0	-0.86851
RWDD2A	4	0.98264	0.9828	0.999986	18962	0	-0.4507
TTI2	4	0.95111	0.95137	0.999986	18289	0	-0.9903
DSG3	4	0.39266	0.53656	0.999986	10258	2	-0.0037852
KLHL31	4	0.045359	0.11038	0.967013	2190	1	-12314
AATF	4	0.98255	0.98272	0.999986	18961	0	-0.73721
ALDH7A1	4	0.98254	0.98272	0.999986	18960	0	-10109
DCTN1	4	0.94609	0.94635	0.999986	18168	0	-24473
GRIN2A	4	0.24806	0.38195	0.999986	7296	1	-0.0557
SCAF11	4	0.036448	0.092243	0.960727	1859	1	-0.80387
CABYR	4	0.98246	0.98264	0.999986	18959	0	-0.70163
RGMA	4	0.81661	0.81694	0.999986	15674	0	-12204
IL4	4	0.19302	0.32291	0.999986	6192	1	-0.70297
GYPB	4	0.91945	0.91975	0.999986	17655	0	-0.37338
DIRC2	4	0.95995	0.96018	0.999986	18494	0	-1059
YAF2	4	0.97143	0.97163	0.999986	18731	0	-0.71167
BMP10	4	0.12817	0.25306	0.999776	4877	1	-12535
SEPP1	4	0.28201	0.41817	0.999986	8004	1	-14343
MFI2	4	0.090539	0.19711	0.996885	3817	3	0.23396
TCTE3	4	0.96987	0.97007	0.999986	18695	0	-13166
SNTG1	4	0.78138	0.78244	0.999986	14988	1	-12467
TBC1D1	4	0.98226	0.98246	0.999986	18958	0	-0.94179
LRRC42	4	0.80687	0.80724	0.999986	15462	0	-10449
SDHAF1	4	0.98221	0.9824	0.999986	18957	0	-1252
ZMYM3	4	0.90323	0.90347	0.999986	17359	0	-11555
NKX2-5	4	0.82342	0.82378	0.999986	15815	0	-10203
TNNI2	4	0.98218	0.98236	0.999986	18956	0	-0.57951
GREM2	4	0.95871	0.95894	0.999986	18460	0	-22583
STEAP3	4	0.98214	0.98232	0.999986	18955	0	-0.66064
INA	4	0.98213	0.98232	0.999986	18954	0	-15711
NGDN	4	0.32203	0.46109	0.999986	8804	1	-0.48878
C15orf57	4	0.98212	0.98231	0.999986	18953	0	-0.6656
LYPLA1	4	0.98054	0.98076	0.999986	18909	0	-11878
THAP10	4	0.98203	0.98222	0.999986	18952	0	-0.69817
DLG3	4	0.92722	0.92749	0.999986	17811	0	-0.74981
LYZL2	4	0.98196	0.98216	0.999986	18950	0	-10286
TMEM42	4	0.20818	0.33922	0.999986	6480	2	0.25679
ERICH6B	4	0.9819	0.98211	0.999986	18949	0	-10769
SLC51A	4	0.98187	0.98207	0.999986	18948	0	-0.71082
MFRP	4	0.92037	0.92065	0.999986	17675	0	-0.63889
ZCCHC12	4	0.55576	0.62505	0.999986	11912	1	-10718
MRPS15	4	0.54922	0.62148	0.999986	11851	1	-15902
E2F5	4	0.043562	0.10673	0.967013	2128	2	-0.65874
GLUD1	4	0.98183	0.98203	0.999986	18947	0	-0.72652
PARP12	4	0.17707	0.30568	0.999986	5866	2	-0.53799
PHC2	4	0.54888	0.62131	0.999986	11844	1	-0.52256
DLG4	4	0.98181	0.982	0.999986	18946	0	-0.87443
USP17L7	4	0.95335	0.9536	0.999986	18342	0	-11463
CLDN3	4	0.96691	0.96714	0.999986	18639	0	-15082
ACADM	4	0.98178	0.98199	0.999986	18945	0	-0.49011
MBOAT1	4	0.58035	0.63881	0.999986	12188	1	-0.97581
MPP4	4	0.0057298	0.019817	0.893	429	2	-0.054007
PNCK	4	0.93914	0.93937	0.999986	18028	0	-44377
VRK3	4	0.98171	0.98191	0.999986	18944	0	-0.61678
OR1D2	4	0.98097	0.98117	0.999986	18922	0	-1612
CAP2	4	0.98171	0.98191	0.999986	18943	0	-0.94033
BRIP1	4	0.85553	0.85594	0.999986	16411	0	-16054
PRKAR1A	4	0.98162	0.98182	0.999986	18942	0	-15694
PF4V1	4	0.70753	0.72122	0.999986	13793	1	-0.65014
MARCKS	4	0.98158	0.98177	0.999986	18941	0	-0.83536
GLDN	4	0.69107	0.70914	0.999986	13564	1	-0.3814
Control_234	4	0.98153	0.98172	0.999986	18940	0	-0.70995
SLMO1	4	0.98152	0.98171	0.999986	18939	0	-0.67085
PROK2	4	0.55947	0.62711	0.999986	11954	1	-0.65125
KRTAP12-3	4	0.98149	0.98168	0.999986	18938	0	-0.5695
CCDC6	4	0.6561	0.6851	0.999986	13111	1	-0.82931
FAM122C	4	0.050735	0.12101	0.972656	2405	2	-0.17311
MMEL1	4	0.64551	0.67814	0.999986	12976	1	0.04247
CCNA2	4	0.67434	0.69727	0.999986	13345	1	-2.13
RAB6C	4	0.98145	0.98164	0.999986	18937	0	-0.99341
DSTYK	4	0.96283	0.96303	0.999986	18557	0	-11417
MED14	4	0.9814	0.98159	0.999986	18936	0	-0.89532
NCOR1	4	0.69455	0.7117	0.999986	13609	1	-0.55126
CLDN11	4	0.95438	0.95461	0.999986	18364	0	-10674
CTAG1A	4	0.9654	0.96561	0.999986	18612	0	-11479
DND1	4	0.93121	0.93147	0.999986	17887	0	-0.89537
KLHL40	4	0.58097	0.63915	0.999986	12199	1	-0.98306
EIF4B	4	0.98133	0.98152	0.999986	18935	0	-0.82818
C1orf216	4	0.98132	0.98151	0.999986	18934	0	-0.9557
IL7	4	0.91004	0.91034	0.999986	17490	0	-0.70991
PTCD3	4	0.98132	0.98151	0.999986	18933	0	-0.80462
GEMIN7	4	0.66188	0.68886	0.999986	13183	1	-16642
CDIP1	4	0.81586	0.8162	0.999986	15659	0	-16874
CP	4	0.9501	0.95031	0.999986	18267	0	-0.69881
C1orf53	4	0.45858	0.576	0.999986	10975	1	-1.11
RAPSN	4	0.71409	0.72616	0.999986	13902	1	-0.89338
CMBL	4	0.24105	0.3745	0.999986	7146	2	0.17136
PROSER1	4	0.98124	0.98144	0.999986	18932	0	-0.37921
SMR3B	4	0.54491	0.61917	0.999986	11797	1	-10611
RASGEF1A	4	0.57147	0.63379	0.999986	12089	1	-10639
RNPEPL1	4	0.69173	0.70962	0.999986	13568	1	-0.68443
NPRL2	4	0.98119	0.98138	0.999986	18931	0	-10553
CDC6	4	0.9076	0.90788	0.999986	17440	0	-13505
TRPV2	4	0.98117	0.98136	0.999986	18930	0	-0.69742
DENND4B	4	0.94367	0.94396	0.999986	18127	0	-12475
MAP1B	4	0.98116	0.98135	0.999986	18929	0	-0.60898
FASLG	4	0.27887	0.41484	0.999986	7933	2	0.098217
ZW10	4	0.80364	0.80401	0.999986	15395	0	-39172
CDHR1	4	0.6734	0.69663	0.999986	13329	1	-0.29588
DCAKD	4	0.93129	0.93154	0.999986	17890	0	-13359
PEX11A	4	0.98067	0.98088	0.999986	18914	0	-0.85936
GOLGA8B	4	0.55704	0.62576	0.999986	11929	1	-0.014518
ACADVL	4	0.69577	0.71261	0.999986	13629	1	-10893
UNC13D	4	0.95228	0.95255	0.999986	18318	0	-16724
FAM153A	4	0.98099	0.98118	0.999986	18925	0	-1818
NIN	4	0.98098	0.98118	0.999986	18924	0	-0.40558
GPR17	4	0.01788	0.052995	0.921872	1111	1	-0.40821
Control_232	4	0.052373	0.12428	0.980289	2455	2	0.093956
EPPIN-WFDC6	4	0.04444	0.10846	0.967013	2158	2	-0.25569
DHX33	4	0.87836	0.87867	0.999986	16884	0	-10879
PAM	4	0.93927	0.93951	0.999986	18031	0	-0.27331
TMEM263	4	0.62928	0.66789	0.999986	12765	1	-11224
NOC2L	4	0.76528	0.76773	0.999986	14690	1	-21444
SPRED2	4	0.98086	0.98106	0.999986	18921	0	-0.5707
FAXDC2	4	0.98082	0.98102	0.999986	18920	0	-0.55379
ENGASE	4	0.9808	0.98101	0.999986	18919	0	-11267
ESPL1	4	0.73022	0.73876	0.999986	14146	1	-0.72972
NBPF10	4	0.38877	0.53238	0.999986	10183	1	-2086
ZNF627	4	0.69918	0.71514	0.999986	13675	1	-0.88987
ETFA	4	0.98073	0.98094	0.999986	18916	0	-0.37252
BSCL2	4	0.81523	0.81557	0.999986	15646	0	-18501
SKP1	4	0.92929	0.92952	0.999986	17844	0	-19073
CHSY1	4	0.98068	0.98089	0.999986	18915	0	-34073
TFEC	4	0.86247	0.86282	0.999986	16547	0	-0.84377
SPDYE6	4	0.30031	0.43785	0.999986	8348	2	-0.792
RNF138	4	0.92138	0.92168	0.999986	17700	0	-17758
ABHD17A	4	0.98063	0.98084	0.999986	18913	0	-0.82756
FAM8A1	4	0.98061	0.98083	0.999986	18912	0	-12395
OR13J1	4	0.40845	0.55318	0.999986	10550	1	-12268
COG6	4	0.98055	0.98077	0.999986	18910	0	-0.92392
ANKS4B	4	0.80651	0.80686	0.999986	15454	0	-0.9086
ZNF630	4	0.15575	0.2829	0.999986	5452	1	-0.78844
FAM90A1	4	0.34125	0.48166	0.999986	9203	2	-0.67949
TMEM64	4	0.36302	0.50488	0.999986	9658	2	0.28311
FRMPD2	4	0.24931	0.38329	0.999986	7328	1	-0.65823
AJAP1	4	0.05138	0.12232	0.976343	2425	2	0.26148
ING1	4	0.96701	0.96724	0.999986	18642	0	-11363
ETV1	4	0.13273	0.25797	0.999776	4970	2	0.050875
WDR4	4	0.98033	0.98056	0.999986	18908	0	-0.92719
MUC17	4	0.88472	0.88495	0.999986	17001	0	-1329
RAP1GAP	4	0.89937	0.8996	0.999986	17288	0	-0.37089
ATP6V1G1	4	0.98025	0.98047	0.999986	18907	0	-17134
TCHHL1	4	0.98024	0.98046	0.999986	18906	0	-0.75989
APOO	4	0.92047	0.92076	0.999986	17678	0	-0.42126
COX6B1	4	0.98024	0.98045	0.999986	18905	0	-0.69329
FGFR1OP2	4	0.69015	0.70848	0.999986	13550	1	-18579
SRBD1	4	0.91891	0.91919	0.999986	17646	0	-19226
REEP2	4	0.82888	0.82918	0.999986	15920	0	-0.95033
IDO2	4	0.097568	0.21005	0.996885	4072	2	0.054691
CD74	4	0.98017	0.98038	0.999986	18904	0	-0.62945
HSP90B1	4	0.53371	0.61325	0.999986	11683	1	-20325
RAP1GAP2	4	0.41904	0.55787	0.999986	10645	1	-0.82119
CELA1	4	0.97085	0.97104	0.999986	18718	0	-20864
CASD1	4	0.53708	0.615	0.999986	11711	1	-0.8119
PRKCI	4	0.80911	0.80944	0.999986	15508	0	-0.72991
CNTNAP2	4	0.98005	0.98025	0.999986	18903	0	-0.47547
TWF1	4	0.98004	0.98024	0.999986	18902	0	-0.79443
CLSTN1	4	0.26222	0.397	0.999986	7569	1	-0.63441
KRTAP4-2	4	0.91178	0.91211	0.999986	17520	0	-0.88984
GPR176	4	0.98003	0.98023	0.999986	18901	0	-0.5689
CFAP53	4	0.79436	0.79479	0.999986	15214	1	-0.75137
OSBPL2	4	0.014057	0.04458	0.918051	939	2	0.32261
SPATS1	4	0.52526	0.60892	0.999986	11602	1	-0.87497
C11orf73	4	0.97993	0.98014	0.999986	18900	0	-0.51114
APTX	4	0.36988	0.51212	0.999986	9799	1	-0.45057
LECT2	4	0.97993	0.98013	0.999986	18899	0	-0.48232
PRB2	4	0.072501	0.16346	0.988817	3192	2	-0.13272
PYGM	4	0.55995	0.62735	0.999986	11959	1	-13549
NLRP14	4	0.97984	0.98005	0.999986	18898	0	-0.78354
ATP5O	4	0.88016	0.88045	0.999986	16912	0	-0.64343
NRF1	4	0.40422	0.54906	0.999986	10470	1	-1712
SLC39A11	4	0.6228	0.66393	0.999986	12681	1	-0.72159
PUM2	4	0.97973	0.97993	0.999986	18896	0	-0.7245
SCGN	4	0.18608	0.31543	0.999986	6053	2	0.24641
DPH6	4	0.97969	0.97989	0.999986	18895	0	-14038
GHR	4	0.76523	0.76768	0.999986	14689	1	-0.40604
PCDHGA3	4	0.97964	0.97984	0.999986	18893	0	-0.59921
SORCS3	4	0.84598	0.8463	0.999986	16237	0	-0.61613
FAM13A	4	0.91023	0.91055	0.999986	17493	0	-0.38769
MED12L	4	0.80566	0.80599	0.999986	15435	0	-10538
HGH1	4	0.18245	0.31153	0.999986	5981	1	-0.58322
LGALS9B	4	0.50859	0.60036	0.999986	11446	1	-16842
TEX101	4	0.6201	0.66227	0.999986	12650	1	-0.44561
KLF1	4	0.97955	0.97974	0.999986	18892	0	-0.82649
NMNAT1	4	0.97951	0.9797	0.999986	18890	0	-0.70154
AKR7A2	4	0.52455	0.60856	0.999986	11593	1	-10294
XAB2	4	0.97457	0.97475	0.999986	18796	0	-10553
MYEF2	4	0.88113	0.88141	0.999986	16934	0	-0.22916
ZNF652	4	0.4112	0.55443	0.999986	10576	1	-11215
TSC22D3	4	0.95605	0.95626	0.999986	18402	0	-10784
MCAT	4	0.94777	0.948	0.999986	18204	0	-11983
PFKP	4	0.39159	0.53538	0.999986	10239	2	-0.2371
PLXNC1	4	0.045259	0.11016	0.967013	2188	1	-12308
LPPR5	4	0.27766	0.41357	0.999986	7910	2	-0.44787
Control_175	4	0.44319	0.56878	0.999986	10851	1	-0.94978
RNASE12	4	0.78717	0.78791	0.999986	15079	1	-0.123
HCRTR2	4	0.97932	0.97952	0.999986	18889	0	-0.71788
KRI1	4	0.95001	0.95022	0.999986	18262	0	-0.80802
MRAS	4	0.059719	0.13866	0.982162	2724	2	-0.44589
KBTBD13	4	0.9793	0.9795	0.999986	18888	0	-0.79842
AQP8	4	0.12346	0.24797	0.999776	4783	2	-0.65769
KCTD11	4	0.9792	0.97941	0.999986	18885	0	-0.65459
ADH1B	4	0.91439	0.91471	0.999986	17562	0	-0.54203
KIAA0368	4	0.27753	0.41342	0.999986	7906	2	0.2621
ASPH	4	0.97913	0.97934	0.999986	18884	0	-10446
EHBP1L1	4	0.16256	0.29014	0.999986	5597	1	-0.79905
GDI1	4	0.97911	0.97931	0.999986	18883	0	-0.77148
SSBP1	4	0.57916	0.63816	0.999986	12173	1	-13127
ZHX2	4	0.87825	0.87855	0.999986	16882	0	-0.52707
BAHD1	4	0.52428	0.60843	0.999986	11589	1	-0.67783
MPLKIP	4	0.02469	0.067599	0.934156	1400	2	-0.15915
OR2B2	4	0.97906	0.97927	0.999986	18882	0	-0.55005
MRPL12	4	0.94695	0.94717	0.999986	18185	0	-0.48835
PALB2	4	0.14174	0.26777	0.999986	5178	2	-0.3124
FAM198A	4	0.87526	0.87557	0.999986	16816	0	-0.31366
HINFP	4	0.97894	0.97915	0.999986	18880	0	-26753
KCNK17	4	0.97894	0.97915	0.999986	18877	0	-1938
LGR6	4	0.97894	0.97915	0.999986	18878	0	-10845
RUNDC1	4	0.97894	0.97915	0.999986	18879	0	-10281
ZBTB7B	4	0.50029	0.5962	0.999986	11369	1	-12031
ANKS1B	4	0.97721	0.97738	0.999986	18840	0	-17831
FAM47C	4	0.17327	0.30165	0.999986	5796	1	-0.4556
CHMP7	4	0.97891	0.97912	0.999986	18876	0	-0.64662
KHDC1L	4	0.97888	0.97908	0.999986	18875	0	-0.45839
SLC11A1	4	0.89201	0.89219	0.999986	17150	0	-10674
PNMA3	4	0.97883	0.97902	0.999986	18873	0	-10458
RNF207	4	0.97261	0.97282	0.999986	18749	0	-0.34807
LNX1	4	0.68245	0.70293	0.999986	13455	1	-0.53278
MOB3C	4	0.81051	0.81088	0.999986	15537	0	-14968
CNOT4	4	0.97874	0.97894	0.999986	18872	0	-0.96642
HMOX1	4	0.86143	0.86177	0.999986	16531	0	-14969
CDK16	4	0.97872	0.97893	0.999986	18871	0	-0.40487
IGIP	4	0.86914	0.86945	0.999986	16690	0	-0.44915
TRABD	4	0.97869	0.9789	0.999986	18870	0	-0.37508
BTNL9	4	0.77174	0.77346	0.999986	14823	1	-15053
S100A3	4	0.1228	0.24723	0.999776	4771	1	-0.1168
PIP4K2C	4	0.91229	0.91259	0.999986	17530	0	-0.90561
DCAF12	4	0.70228	0.71739	0.999986	13723	1	-13873
EPHA1	4	0.65949	0.68731	0.999986	13155	1	-0.58167
COLEC10	4	0.97852	0.97873	0.999986	18869	0	-0.69097
OR8K3	4	0.97851	0.97872	0.999986	18868	0	-0.55842
TMIGD1	4	0.97851	0.97872	0.999986	18867	0	-0.56348
UVRAG	4	0.9785	0.97871	0.999986	18866	0	-0.65042
GRAPL	4	0.97849	0.9787	0.999986	18865	0	-0.40436
LSM6	4	0.47288	0.58286	0.999986	11109	1	-0.69873
NUDT8	4	0.58059	0.63894	0.999986	12191	1	-0.66102
TAS2R3	4	0.46533	0.57919	0.999986	11034	1	-0.6738
ZNF479	4	0.97843	0.97864	0.999986	18864	0	-0.49206
RAB15	4	0.54448	0.61894	0.999986	11796	1	-0.86782
ZCCHC7	4	0.89117	0.89135	0.999986	17136	0	-10599
SF3B6	4	0.97835	0.97856	0.999986	18863	0	-0.79185
CCDC59	4	0.23943	0.37277	0.999986	7110	1	-18942
ZMYND12	4	0.079705	0.17702	0.992961	3448	1	0.059849
PRDM6	4	0.2681	0.40321	0.999986	7688	2	-0.6239
RBL1	4	0.97822	0.97842	0.999986	18862	0	-0.67634
MON1A	4	0.82813	0.82844	0.999986	15900	0	-0.81035
LPPR2	4	0.9782	0.9784	0.999986	18861	0	-0.64639
TRPM2	4	0.96159	0.9618	0.999986	18524	0	-0.66977
LOC101060389	4	0.30348	0.44125	0.999986	8425	1	-13974
KRTAP9-1	4	0.97812	0.97831	0.999986	18859	0	-0.53034
KCNA1	4	0.17762	0.30629	0.999986	5881	2	0.12724
C10orf54	4	0.97809	0.97829	0.999986	18858	0	-0.59728
GOLGA6C	4	0.65855	0.68668	0.999986	13146	1	-3.61
ZNF433	4	0.3381	0.47828	0.999986	9151	1	-0.57622
LGALS2	4	0.36721	0.50926	0.999986	9739	1	-0.58767
SH3RF3	4	0.31246	0.45087	0.999986	8604	2	0.18192
FAM170A	4	0.41739	0.55714	0.999986	10632	1	-0.51834
MED9	4	0.97799	0.97818	0.999986	18857	0	-10547
SAMD12	4	0.97797	0.97817	0.999986	18855	0	-0.70566
IHH	4	0.075816	0.16979	0.990623	3318	1	-0.70962
TARS2	4	0.93889	0.9391	0.999986	18021	0	-18024
LPCAT4	4	0.037252	0.093855	0.960767	1889	1	-0.31103
Control_108	4	0.97794	0.97814	0.999986	18854	0	-0.34972
ST3GAL3	4	0.25835	0.39282	0.999986	7500	1	-10652
TECPR2	4	0.80436	0.80472	0.999986	15413	0	0.05385
RAPGEF3	4	0.95493	0.95515	0.999986	18375	0	-0.78612
LAMA2	4	0.91362	0.91392	0.999986	17549	0	-0.96852
CHPF	4	0.97785	0.97804	0.999986	18853	0	-0.55158
MIPEP	4	0.83454	0.83483	0.999986	16017	0	-56804
OR8K1	4	0.66841	0.69322	0.999986	13271	1	-0.78464
PTPRQ	4	0.68667	0.70594	0.999986	13508	1	-10449
LMNTD2	4	0.29529	0.43245	0.999986	8252	1	-11435
SLC6A17	4	0.97777	0.97796	0.999986	18852	0	-0.9345
KIAA2022	4	0.89218	0.89235	0.999986	17153	0	-0.79056
CBY1	4	0.90065	0.90091	0.999986	17317	0	-0.82683
PBLD	4	0.97774	0.97793	0.999986	18851	0	-0.6041
HLF	4	0.96454	0.96477	0.999986	18594	0	-0.76209
RASSF10	4	0.71843	0.72952	0.999986	13975	1	-0.39521
DIMT1	4	0.40153	0.54619	0.999986	10411	2	-0.88374
BAZ2B	4	0.23585	0.36894	0.999986	7039	1	-0.90436
TARS	4	0.97767	0.97786	0.999986	18850	0	-11858
HOOK2	4	0.55457	0.62439	0.999986	11903	1	-0.85659
HS6ST3	4	0.050558	0.12067	0.972656	2399	3	0.57283
TMEM45A	4	0.87279	0.8731	0.999986	16767	0	-0.84936
ATP5SL	4	0.21495	0.34652	0.999986	6609	1	-11959
CHP1	4	0.70942	0.72266	0.999986	13831	1	-0.56842
Control_239	4	0.93288	0.93314	0.999986	17920	0	-0.81434
SERPINB5	4	0.96828	0.96848	0.999986	18662	0	-1465
PCDHB6	4	0.97752	0.9777	0.999986	18848	0	-0.71751
MCM4	4	0.76876	0.77086	0.999986	14761	1	-24288
MUTYH	4	0.059151	0.13755	0.982162	2705	2	-0.29432
CASC4	4	0.97749	0.97768	0.999986	18847	0	-0.75168
OR52B2	4	0.46987	0.58142	0.999986	11077	1	-0.16246
CHRM2	4	0.97748	0.97765	0.999986	18846	0	-0.52788
ID2	4	0.97746	0.97763	0.999986	18845	0	-0.77956
GPR149	4	0.97744	0.97762	0.999986	18844	0	-0.46166
PRSS2	4	0.96177	0.96197	0.999986	18530	0	-0.9389
WDR45B	4	0.17961	0.30846	0.999986	5928	1	-0.81166
NUP50	4	0.47267	0.58276	0.999986	11107	1	-1469
KRTAP19-6	4	0.26431	0.39924	0.999986	7609	2	-0.012011
CACHD1	4	0.37958	0.52251	0.999986	10006	1	-0.53917
TAS2R43	4	0.43425	0.56471	0.999986	10773	1	-0.93199
OR4A15	4	0.32891	0.46849	0.999986	8959	1	-0.3597
NAB2	4	0.97733	0.9775	0.999986	18842	0	-0.86384
PCDHGB1	4	0.12285	0.24728	0.999776	4772	2	-0.92105
ESAM	4	0.97732	0.97749	0.999986	18841	0	-1019
ARHGAP9	4	0.38221	0.52536	0.999986	10060	1	-0.76035
SLC39A12	4	0.073477	0.16532	0.988817	3233	1	-0.95514
ZNF443	4	0.8775	0.87777	0.999986	16868	0	-0.84199
TESK1	4	0.92571	0.92599	0.999986	17782	0	-0.7739
LY6H	4	0.80753	0.80794	0.999986	15474	0	-0.90414
TMEM201	4	0.37694	0.51969	0.999986	9938	1	-0.42455
PRKCH	4	0.28064	0.41675	0.999986	7975	2	-0.51807
ZNF592	4	0.8493	0.84965	0.999986	16286	0	-0.40433
ACTA2	4	0.0051295	0.017828	0.878357	392	1	-0.65798
NDC1	4	0.78725	0.78799	0.999986	15081	1	-35909
ZNF618	4	0.40674	0.55182	0.999986	10523	1	-0.6846
NOP2	4	0.9772	0.97738	0.999986	18839	0	-48101
LRP12	4	0.97717	0.97735	0.999986	18838	0	-0.54529
USP49	4	0.82333	0.82369	0.999986	15811	0	-0.91306
KCNK5	4	0.97711	0.97729	0.999986	18837	0	-0.61341
CNR2	4	0.027584	0.073793	0.942604	1515	2	0.00078048
POC1B-GALNT4	4	0.25651	0.39086	0.999986	7467	1	-11644
LDHB	4	0.69002	0.70838	0.999986	13548	1	-0.13076
ARL17B	4	0.89014	0.89035	0.999986	17119	0	-32309
P4HTM	4	0.91637	0.9167	0.999986	17599	0	-10767
FLOT2	4	0.044311	0.1082	0.967013	2153	1	-0.25351
BCL6B	4	0.92606	0.92632	0.999986	17789	0	-0.98234
ZBTB5	4	0.76823	0.7704	0.999986	14751	1	-10011
MEAF6	4	0.33469	0.4747	0.999986	9087	2	-0.38788
PLK1	4	0.97693	0.97711	0.999986	18836	0	-12543
SEMA6A	4	0.19521	0.32528	0.999986	6233	1	-0.84667
TRAPPC6B	4	0.3898	0.53347	0.999986	10208	1	-0.036103
BLOC1S5	4	0.97688	0.97706	0.999986	18835	0	-0.91138
RCC1	4	0.38896	0.53259	0.999986	10191	1	-17792
Control_32	4	0.864	0.86429	0.999986	16582	0	-0.40694
IL17RD	4	0.72898	0.73782	0.999986	14127	1	-0.72959
CIRH1A	4	0.97684	0.97703	0.999986	18834	0	-23252
DNTTIP1	4	0.96283	0.96303	0.999986	18556	0	-0.99223
GPATCH11	4	0.95695	0.95715	0.999986	18419	0	-10429
MTMR14	4	0.80855	0.8089	0.999986	15493	0	-0.71677
WDR89	4	0.40331	0.54811	0.999986	10448	1	-0.17748
LAMB2	4	0.97677	0.97696	0.999986	18833	0	-0.5508
SEMA3F	4	0.81373	0.81407	0.999986	15606	0	-0.7593
LRRIQ1	4	0.018648	0.054648	0.925766	1141	2	-0.066397
RPL8	4	0.89992	0.90013	0.999986	17299	0	-39988
ODF1	4	0.22712	0.35962	0.999986	6859	1	-0.97833
CIART	4	0.9767	0.97691	0.999986	18832	0	-0.9414
RPLP2	4	0.40635	0.5514	0.999986	10515	2	-10154
PSMA6	4	0.55639	0.62539	0.999986	11924	1	-27591
EIF2B3	4	0.97666	0.97688	0.999986	18831	0	-12528
LXN	4	0.97663	0.97684	0.999986	18830	0	-0.41975
SIMC1	4	0.12634	0.25107	0.999776	4836	2	-0.2669
CXCL3	4	0.97661	0.97682	0.999986	18829	0	-0.94455
XCL1	4	0.97661	0.97682	0.999986	18828	0	-1055
PRR15L	4	0.24164	0.37508	0.999986	7159	1	-18092
SNRNP40	4	0.97659	0.9768	0.999986	18827	0	-0.76285
KDM5C	4	0.97659	0.97679	0.999986	18826	0	-0.60589
PIGC	4	0.77954	0.78068	0.999986	14952	1	-0.051409
OR13A1	4	0.74656	0.75196	0.999986	14398	1	-0.41086
F9	4	0.10516	0.22379	0.996885	4340	1	-0.61071
RGL2	4	0.24032	0.37371	0.999986	7128	1	-10923
XRCC6BP1	4	0.097722	0.21031	0.996885	4077	1	-0.94834
UBC	4	0.9765	0.97671	0.999986	18824	0	-0.6269
UBE2O	4	0.1335	0.25882	0.999776	4990	1	-42545
FAM9B	4	0.10118	0.2166	0.996885	4197	3	0.30349
OR2AP1	4	0.97195	0.97215	0.999986	18740	0	-0.82008
PISD	4	0.97644	0.97665	0.999986	18823	0	-31068
DHH	4	0.80188	0.80226	0.999986	15358	1	-0.45335
FOXRED2	4	0.65899	0.68698	0.999986	13148	1	-0.70226
CHMP3	4	0.97628	0.97652	0.999986	18821	0	-14508
CDK15	4	0.0018324	0.0066089	0.818742	155	1	-0.95281
POT1	4	0.97627	0.97651	0.999986	18820	0	-11671
PPIL1	4	0.97626	0.9765	0.999986	18819	0	-15889
SYT16	4	0.36618	0.50819	0.999986	9715	1	-0.94375
DNAH12	4	0.19846	0.32874	0.999986	6293	1	-0.75721
PRSS58	4	0.42021	0.55839	0.999986	10654	1	-0.62237
TM7SF3	4	0.17733	0.30599	0.999986	5872	2	0.043485
HSPA12A	4	0.70174	0.71697	0.999986	13714	1	-0.95516
IGF2BP1	4	0.97614	0.97637	0.999986	18818	0	-0.72434
NFS1	4	0.82284	0.82319	0.999986	15801	0	-0.29993
ASMT	4	0.97121	0.9714	0.999986	18729	0	-0.79841
CORO1C	4	0.97612	0.97634	0.999986	18817	0	-0.68195
OR7A17	4	0.27292	0.40845	0.999986	7799	2	0.092546
AMMECR1	4	0.33034	0.47001	0.999986	8996	2	-0.0718
DNAL4	4	0.96197	0.96217	0.999986	18535	0	-10962
CCDC87	4	0.45358	0.57363	0.999986	10928	1	-11694
ARMC2	4	0.77087	0.77269	0.999986	14803	1	-0.88871
RSAD2	4	0.96806	0.96826	0.999986	18657	0	-0.7976
TTC23	4	0.76111	0.7642	0.999986	14623	1	-10791
XRCC1	4	0.58723	0.64277	0.999986	12264	1	-10434
SLC50A1	4	0.57629	0.63654	0.999986	12141	1	-0.90015
AFAP1	4	0.23686	0.37003	0.999986	7060	1	-0.18404
PM20D2	4	0.043171	0.1059	0.967013	2111	2	0.13364
DEFB132	4	0.97586	0.97609	0.999986	18814	0	-0.45154
EFCAB6	4	0.95711	0.95732	0.999986	18425	0	-1056
THRA	4	0.27041	0.40572	0.999986	7742	1	-0.35718
IFIT1	4	0.75324	0.75753	0.999986	14502	1	-0.69998
DLGAP3	4	0.64385	0.67708	0.999986	12957	1	-0.43928
EIF5B	4	0.97573	0.97595	0.999986	18813	0	-0.50908
KIAA1161	4	0.97573	0.97595	0.999986	18812	0	-10331
UBQLN2	4	0.019698	0.056951	0.925766	1184	2	0.24529
LCP1	4	0.081063	0.17955	0.993283	3500	2	-0.31137
ARMCX5-GPRASP2	4	0.94781	0.94804	0.999986	18205	0	-11779
AMIGO2	4	0.16468	0.29238	0.999986	5638	1	-0.81864
PDCL2	4	0.12383	0.24835	0.999776	4789	1	-0.66138
MT1A	4	0.95188	0.95214	0.999986	18312	0	-17235
FBXO38	4	0.27225	0.40771	0.999986	7790	1	0.012971
VDAC2	4	0.90759	0.90787	0.999986	17439	0	-13472
WDR49	4	0.13694	0.26256	0.999776	5079	2	0.21621
DVL1	4	0.15731	0.28456	0.999986	5479	2	-0.22438
TXNDC2	4	0.58691	0.64259	0.999986	12261	1	-0.35014
MINPP1	4	0.33239	0.47223	0.999986	9039	1	-0.91628
USP6	4	0.55603	0.6252	0.999986	11917	1	-0.90738
CREG1	4	0.97539	0.97559	0.999986	18810	0	-13588
PSORS1C2	4	0.70926	0.72252	0.999986	13829	1	0.19267
MUC6	4	0.90813	0.90842	0.999986	17451	0	-11447
PKIG	4	0.78599	0.7868	0.999986	15057	1	-0.25707
OR4F29	4	0.97526	0.97544	0.999986	18808	0	-27247
B4GALNT2	4	0.97526	0.97544	0.999986	18807	0	-20852
SLC25A13	4	0.021331	0.060468	0.925766	1262	3	0.66089
GOLGA6L10	4	0.91146	0.9118	0.999986	17514	0	-14171
MVD	4	0.94419	0.94447	0.999986	18137	0	-14723
GRTP1	4	0.16372	0.29136	0.999986	5618	2	-0.032186
GSPT2	4	0.97519	0.97537	0.999986	18806	0	-0.51611
C17orf62	4	0.96261	0.96282	0.999986	18551	0	-0.87988
USF1	4	0.84742	0.84777	0.999986	16266	0	-14682
TRMT5	4	0.09992	0.21429	0.996885	4157	1	-12427
CAPN8	4	0.96539	0.96559	0.999986	18611	0	-0.6806
AZU1	4	0.97508	0.97527	0.999986	18805	0	-0.99831
MYL5	4	0.72888	0.73775	0.999986	14126	1	-14514
POU4F2	4	0.58226	0.63987	0.999986	12208	1	-0.59623
MTIF2	4	0.95306	0.95332	0.999986	18336	0	-0.6736
NAV2	4	0.19922	0.32956	0.999986	6314	1	-0.92691
AMDHD2	4	0.97501	0.9752	0.999986	18804	0	-0.76156
SACS	4	0.97499	0.97518	0.999986	18803	0	-1032
CRBN	4	0.86403	0.86432	0.999986	16583	0	-0.26985
TTC28	4	0.84426	0.84457	0.999986	16205	0	-10551
RPS6KB1	4	0.20287	0.33354	0.999986	6372	2	-0.24448
LIMS1	4	0.083513	0.18411	0.993504	3584	2	0.28256
MRPL36	4	0.97484	0.97501	0.999986	18802	0	-0.76693
SULT1A1	4	0.2986	0.43605	0.999986	8318	1	0.12505
FAM104A	4	0.04006	0.099585	0.967013	1981	1	-20799
KRT82	4	0.9734	0.97359	0.999986	18766	0	-0.93016
CBX6	4	0.83129	0.83163	0.999986	15965	0	-13604
ZNF706	4	0.16725	0.29512	0.999986	5675	1	-38301
OAZ1	4	0.93046	0.9307	0.999986	17867	0	-12756
LMBR1	4	0.42779	0.56179	0.999986	10707	1	-0.63604
DDIT4	4	0.6773	0.69933	0.999986	13385	1	-0.7531
TMEM141	4	0.9747	0.97487	0.999986	18800	0	-0.99281
LMNA	4	0.97465	0.97483	0.999986	18799	0	-0.47466
SLFN13	4	0.97464	0.97482	0.999986	18797	0	-0.79452
UGT2B10	4	0.88648	0.88668	0.999986	17035	0	-0.64299
ZNF518A	4	0.17939	0.30823	0.999986	5925	1	-0.29761
SAYSD1	4	0.060877	0.14093	0.982162	2772	1	-0.83243
KCNH6	4	0.9517	0.95196	0.999986	18305	0	-0.58998
SPATA6	4	0.97451	0.97468	0.999986	18795	0	-0.44416
AP3M1	4	0.93649	0.93672	0.999986	17985	0	-14586
OR2AG1	4	0.83129	0.83163	0.999986	15964	0	-0.32078
RFX1	4	0.5098	0.60096	0.999986	11456	1	-1171
GRINA	4	0.038957	0.097286	0.965788	1950	1	-0.94608
DRGX	4	0.69678	0.71333	0.999986	13636	1	-0.55713
PCDHB1	4	0.85594	0.85634	0.999986	16424	0	-10901
CUL9	4	0.97443	0.97461	0.999986	18793	0	-0.59823
BTG1	4	0.78978	0.79033	0.999986	15126	1	-0.74681
TCF7L2	4	0.90078	0.90102	0.999986	17320	0	-0.43831
CCNG2	4	0.97275	0.97296	0.999986	18751	0	-12186
RHOXF1	4	0.40441	0.54925	0.999986	10474	2	0.0086017
MANEA	4	0.97433	0.97452	0.999986	18791	0	-0.3395
SCN1A	4	0.10772	0.22853	0.99719	4433	2	-0.088376
GPT	4	0.9011	0.90137	0.999986	17324	0	-12877
LRRC37A2	4	0.92429	0.92459	0.999986	17756	0	-34254
ARPC1B	4	0.86503	0.86534	0.999986	16597	0	-0.52864
NFKBIA	4	0.97424	0.97444	0.999986	18790	0	-0.65099
DENND6B	4	0.97422	0.97441	0.999986	18789	0	-0.64459
HNF1A	4	0.94894	0.94914	0.999986	18234	0	-0.86014
CXCL5	4	0.52814	0.61038	0.999986	11627	1	-0.71084
MS4A5	4	0.42993	0.56278	0.999986	10731	1	-0.0027028
MIB2	4	0.97414	0.97433	0.999986	18786	0	-10655
CEP170	4	0.9741	0.97429	0.999986	18785	0	-0.55989
SATB2	4	0.052274	0.12409	0.979676	2452	2	-0.12857
GBF1	4	0.23551	0.36857	0.999986	7033	1	-19974
YBX2	4	0.045222	0.11006	0.967013	2187	2	0.44645
METTL2A	4	0.88631	0.88651	0.999986	17032	0	-0.88213
CLDN15	4	0.97399	0.97418	0.999986	18784	0	-0.56108
B3GALT4	4	0.81289	0.81324	0.999986	15585	0	-0.26648
EXPH5	4	0.0033745	0.01196	0.838344	272	2	-0.015509
GTF3C1	4	0.89237	0.89255	0.999986	17157	0	-13675
SNX33	4	0.97396	0.97415	0.999986	18783	0	-0.69341
CLASRP	4	0.97396	0.97415	0.999986	18782	0	-0.89677
CDK2	4	0.69501	0.71204	0.999986	13613	1	-11836
ZNF236	4	0.97391	0.9741	0.999986	18780	0	-26934
SPEF1	4	0.9739	0.97408	0.999986	18779	0	-0.49136
DVL2	4	0.6739	0.69698	0.999986	13338	1	-0.40221
C7orf33	4	0.6846	0.70442	0.999986	13483	1	-0.59538
HARS2	4	0.97388	0.97407	0.999986	18778	0	-1074
TSPY1	4	0.9225	0.9228	0.999986	17725	0	-0.96882
XKRY	4	0.14513	0.27145	0.999986	5243	2	0.25592
SSTR2	4	0.97383	0.97402	0.999986	18777	0	-0.71971
TWSG1	4	0.35822	0.49974	0.999986	9572	1	-0.97222
ADH1C	4	0.89819	0.89841	0.999986	17272	0	-0.83762
ARHGAP8	4	0.50518	0.5986	0.999986	11413	1	-0.44722
HOXC5	4	0.78242	0.78342	0.999986	15001	1	-11119
GAS2L2	4	0.97376	0.97395	0.999986	18776	0	-0.76193
TRIM42	4	0.11914	0.24331	0.999721	4710	1	-0.60639
P3H2	4	0.97373	0.97392	0.999986	18775	0	-0.44915
DLEU7	4	0.94735	0.94758	0.999986	18193	0	-0.85209
OR2V2	4	0.97368	0.97388	0.999986	18774	0	-0.80033
PKM	4	0.42911	0.56239	0.999986	10720	1	-14603
FAM219B	4	0.66348	0.68993	0.999986	13204	1	-13856
PNOC	4	0.97365	0.97385	0.999986	18772	0	-0.53439
PTBP2	4	0.24414	0.37773	0.999986	7222	2	-0.28359
FCGR1A	4	0.92389	0.92419	0.999986	17750	0	-14456
HRK	4	0.97362	0.97382	0.999986	18771	0	-0.9427
MYL6B	4	0.52323	0.60784	0.999986	11583	1	-0.65279
OR9A4	4	0.97359	0.97379	0.999986	18770	0	-0.50526
ROR1	4	0.56801	0.63183	0.999986	12045	1	-0.31299
ACRBP	4	0.25446	0.3887	0.999986	7422	1	-12652
IKBKG	4	0.79032	0.79086	0.999986	15136	1	-0.76479
HMGCR	4	0.055049	0.12955	0.982162	2546	1	-0.64749
SORCS1	4	0.91943	0.91973	0.999986	17654	0	-14952
SFXN4	4	0.71857	0.72963	0.999986	13978	1	-0.62935
USH1C	4	0.97349	0.97369	0.999986	18769	0	-0.69708
CCDC134	4	0.50472	0.59837	0.999986	11409	1	-0.57439
NR4A3	4	0.2694	0.40461	0.999986	7718	2	-0.050205
UHRF1BP1L	4	0.90668	0.90699	0.999986	17422	0	-0.83207
USP3	4	0.97345	0.97364	0.999986	18768	0	-11554
CDH23	4	0.97344	0.97364	0.999986	18767	0	-0.6643
ARHGEF40	4	0.21504	0.34661	0.999986	6611	2	-0.85428
EPS8L3	4	0.53026	0.61148	0.999986	11648	1	-0.46845
BUB1	4	0.90676	0.90707	0.999986	17425	0	-34716
NELFB	4	0.045957	0.1116	0.967013	2219	2	-0.23933
HEXIM1	4	0.97339	0.97359	0.999986	18765	0	-0.52225
C5orf38	4	0.88155	0.88182	0.999986	16943	0	-10616
RNF144B	4	0.94197	0.94225	0.999986	18069	0	-0.60454
CLPS	4	0.97328	0.97348	0.999986	18764	0	-0.75841
SDC2	4	0.97327	0.97347	0.999986	18763	0	-0.50007
CNTNAP3	4	0.97325	0.97345	0.999986	18762	0	-0.9696
ARC	4	0.011085	0.036889	0.912258	771	1	-1108
PTX3	4	0.79751	0.79789	0.999986	15279	1	-0.7084
PAICS	4	0.34188	0.48234	0.999986	9214	1	-14831
SIRT7	4	0.30803	0.44603	0.999986	8520	2	-0.069981
LSM1	4	0.80384	0.80419	0.999986	15401	0	-0.64287
KCNJ15	4	0.69242	0.71012	0.999986	13578	1	-0.57132
SLC22A6	4	0.45101	0.57242	0.999986	10912	1	-0.19836
ATP13A1	4	0.97307	0.97327	0.999986	18761	0	-0.71766
CYP4X1	4	0.97307	0.97327	0.999986	18760	0	-0.69818
CCL27	4	0.97305	0.97325	0.999986	18759	0	-0.49622
IQGAP2	4	0.77239	0.77405	0.999986	14832	1	-0.9892
ITGAD	4	0.064911	0.14877	0.983007	2930	2	0.24096
SLC12A1	4	0.62387	0.66457	0.999986	12695	1	-0.68699
SLC39A6	4	0.11448	0.23828	0.999721	4614	1	-0.7187
EMC1	4	0.97297	0.97318	0.999986	18758	0	-0.60538
MLNR	4	0.94197	0.94225	0.999986	18077	0	-31795
RBFOX3	4	0.8351	0.83538	0.999986	16026	0	-0.47212
IPMK	4	0.97291	0.97312	0.999986	18755	0	-0.75049
SACM1L	4	0.97291	0.97312	0.999986	18756	0	-20493
RPL38	4	0.97291	0.97312	0.999986	18757	0	-2152
DENND4C	4	0.94758	0.94781	0.999986	18201	0	-0.88324
SERINC1	4	0.11675	0.24071	0.999721	4660	2	0.15974
RPL37	4	0.97278	0.97299	0.999986	18754	0	-1367
CAMKV	4	0.97277	0.97298	0.999986	18753	0	-0.5943
P2RY11	4	0.20185	0.33242	0.999986	6352	2	-0.88481
TMEM179	4	0.97275	0.97296	0.999986	18752	0	-0.66163
ATP1A4	4	0.65739	0.6859	0.999986	13128	1	-0.70485
WDR24	4	0.87381	0.87412	0.999986	16788	0	-0.86521
GAL	4	0.45822	0.57583	0.999986	10969	1	-0.87198
MYL6	4	0.97262	0.97283	0.999986	18750	0	-11245
HTN3	4	0.76684	0.76916	0.999986	14726	1	-0.5675
AXDND1	4	0.15323	0.28017	0.999986	5405	2	0.29606
GLP1R	4	0.97257	0.97278	0.999986	18747	0	-0.47821
CHORDC1	4	0.066237	0.15136	0.985069	2975	1	-17087
MS4A2	4	0.69824	0.71442	0.999986	13661	1	-0.82592
PCSK1N	4	0.53157	0.61216	0.999986	11660	1	-0.4443
PSME2	4	0.46664	0.57984	0.999986	11047	1	-0.76946
PRDX2	4	0.83735	0.83767	0.999986	16071	0	-10499
TRIM77	4	0.62674	0.66633	0.999986	12729	1	-0.57725
CLTCL1	4	0.77441	0.77592	0.999986	14870	1	-10411
EID2B	4	0.97236	0.97258	0.999986	18745	0	-0.76836
PITX2	4	0.77376	0.77532	0.999986	14858	1	-0.89022
OR5AU1	4	0.42007	0.55833	0.999986	10652	1	-0.96677
DDX42	4	0.97228	0.9725	0.999986	18744	0	-14546
NGEF	4	0.9079	0.90819	0.999986	17444	0	-0.69921
NABP2	4	0.94468	0.94495	0.999986	18146	0	-0.91905
TCEB3B	4	0.1175	0.24151	0.999721	4675	1	-0.79112
LCE1F	4	0.070302	0.15924	0.988817	3114	1	-0.71427
ATP6V1E2	4	0.97217	0.97238	0.999986	18743	0	-0.77821
BRSK1	4	0.05846	0.13621	0.982162	2679	2	-0.34243
ABCB6	4	0.97214	0.97235	0.999986	18742	0	-0.59136
SLC1A1	4	0.27363	0.40925	0.999986	7817	2	0.16959
PRR23B	4	0.88635	0.88656	0.999986	17034	0	-0.88982
SLC7A2	4	0.45845	0.57594	0.999986	10972	1	-0.91144
ITPR1	4	0.76891	0.77098	0.999986	14765	1	-0.91619
ATP6V0D1	4	0.83517	0.83545	0.999986	16028	0	-1193
PADI1	4	0.52894	0.61079	0.999986	11635	1	-0.8882
IMPA2	4	0.94902	0.94922	0.999986	18237	0	-11728
MTG1	4	0.97196	0.97215	0.999986	18741	0	-0.72252
SOCS6	4	0.14145	0.26744	0.999986	5172	2	-0.46598
PLOD2	4	0.92153	0.92183	0.999986	17706	0	-10045
RSG1	4	0.9719	0.9721	0.999986	18739	0	-0.76064
SPDYE2B	4	0.93681	0.93705	0.999986	17988	0	-15344
PDILT	4	0.54825	0.62099	0.999986	11838	1	0.0022515
TSPAN10	4	0.79555	0.79594	0.999986	15233	1	-0.69044
SGIP1	4	0.97185	0.97205	0.999986	18738	0	-0.38554
ZFP3	4	0.21064	0.34187	0.999986	6529	1	-0.80592
TRIM49C	4	0.58959	0.6441	0.999986	12292	1	-12942
SCNN1A	4	0.92823	0.92849	0.999986	17825	0	-21774
HDAC10	4	0.9718	0.972	0.999986	18737	0	-0.66311
AANAT	4	0.90835	0.90865	0.999986	17455	0	-0.71727
KIRREL3	4	0.64979	0.68095	0.999986	13036	1	-0.62847
PLD2	4	0.81359	0.81393	0.999986	15602	0	-0.89073
USP17L27	4	0.73336	0.74125	0.999986	14198	1	-12936
PCDHB2	4	0.97168	0.97189	0.999986	18736	0	-0.42243
AKR1A1	4	0.91503	0.91535	0.999986	17572	0	-11708
RNF32	4	0.61951	0.66188	0.999986	12645	1	-0.44802
XBP1	4	0.40535	0.55031	0.999986	10493	2	-0.1907
RNPC3	4	0.97162	0.97181	0.999986	18735	0	-12007
FIBP	4	0.97158	0.97178	0.999986	18734	0	-0.86368
SYAP1	4	0.84044	0.84079	0.999986	16140	0	-0.36277
WBP4	4	0.9715	0.9717	0.999986	18733	0	-0.41291
NUDT16L1	4	0.97148	0.97168	0.999986	18732	0	-0.50825
RGS7BP	4	0.01584	0.048506	0.921872	1009	1	-0.63161
FAM122A	4	0.18365	0.31281	0.999986	6009	1	-1.64
ASB2	4	0.96175	0.96195	0.999986	18529	0	-0.55792
DYRK3	4	0.055161	0.12977	0.982162	2549	3	0.58131
Control_122	4	0.42979	0.56271	0.999986	10728	1	-0.62542
AMHR2	4	0.28881	0.42553	0.999986	8131	1	-10667
CACNA2D1	4	0.56928	0.63255	0.999986	12064	1	-0.75843
ZC2HC1C	4	0.33102	0.47076	0.999986	9008	1	-1246
FAM110B	4	0.90054	0.90079	0.999986	17312	0	-0.70579
CCL5	4	0.32358	0.46272	0.999986	8831	1	-0.55521
TAAR1	4	0.12564	0.25028	0.999776	4819	2	-0.062524
TULP1	4	0.79712	0.79751	0.999986	15272	1	-0.91535
SPAG16	4	0.97122	0.97142	0.999986	18730	0	-0.49951
FAM50A	4	0.60759	0.65466	0.999986	12505	1	-0.30926
DEDD	4	0.97121	0.9714	0.999986	18728	0	-0.46438
HMG20B	4	0.27991	0.41595	0.999986	7957	1	-0.73121
MRRF	4	0.95006	0.95027	0.999986	18266	0	-16774
GCHFR	4	0.35177	0.49289	0.999986	9412	2	0.30553
HK3	4	0.89759	0.89781	0.999986	17261	0	-0.82991
PRELP	4	0.79281	0.79328	0.999986	15183	1	-0.34278
ZNF486	4	0.9711	0.9713	0.999986	18727	0	-0.45247
PRDM2	4	0.81939	0.81976	0.999986	15732	0	-12759
CRLF3	4	0.97108	0.97128	0.999986	18726	0	-0.84496
BRI3BP	4	0.97106	0.97126	0.999986	18725	0	-10369
MAGEA9B	4	0.012876	0.04195	0.912258	883	2	0.38933
RNFT1	4	0.97104	0.97124	0.999986	18724	0	-10239
EFEMP1	4	0.93053	0.93077	0.999986	17870	0	-0.8558
SPATA31D3	4	0.971	0.9712	0.999986	18723	0	-0.67661
PLA2G4A	4	0.97099	0.97119	0.999986	18722	0	-0.57782
C7orf73	4	0.6952	0.71218	0.999986	13618	1	-0.71115
DCAF16	4	0.090095	0.1963	0.996885	3804	3	0.2419
CREB3L4	4	0.97096	0.97116	0.999986	18721	0	-0.42708
LDHAL6B	4	0.93059	0.93083	0.999986	17872	0	-0.73746
CNGA4	4	0.97092	0.97113	0.999986	18720	0	-0.30904
MNX1	4	0.88944	0.88962	0.999986	17104	0	-0.60014
ARHGEF12	4	0.3069	0.44484	0.999986	8495	1	-0.6847
KCNG1	4	0.86347	0.86378	0.999986	16570	0	-12643
ABCB4	4	0.72028	0.73097	0.999986	14004	1	-17656
PSMD1	4	0.97087	0.97107	0.999986	18719	0	-0.52295
IL18	4	0.59168	0.64531	0.999986	12316	1	-0.96152
CXCL11	4	0.78915	0.78976	0.999986	15114	1	-0.79498
GAB4	4	0.77038	0.77227	0.999986	14793	1	-0.71048
WIPF1	4	0.11172	0.23531	0.998384	4555	2	-0.15889
TMEM161B	4	0.97082	0.97101	0.999986	18717	0	-13803
NAA60	4	0.31741	0.45615	0.999986	8697	1	-0.76379
OIP5	4	0.23271	0.36556	0.999986	6983	2	0.095842
GTF2B	4	0.89944	0.89966	0.999986	17291	0	-0.86872
PPP1R3F	4	0.97076	0.97094	0.999986	18716	0	-0.62903
EVC2	4	0.90948	0.9098	0.999986	17473	0	-0.57404
PRPF38A	4	0.97071	0.9709	0.999986	18715	0	-50423
TPD52L3	4	0.10835	0.22968	0.99719	4454	3	0.30386
NCKAP5	4	0.9707	0.97089	0.999986	18714	0	-0.3806
DHX37	4	0.97068	0.97088	0.999986	18713	0	-0.9927
MAOB	4	0.38001	0.52298	0.999986	10015	2	-0.34794
2001-03-01	4	0.97067	0.97087	0.999986	18712	0	-0.43478
PIP5K1C	4	0.53803	0.6155	0.999986	11723	1	-0.89192
RASSF7	4	0.062994	0.14501	0.982162	2855	1	-0.54213
CUTA	4	0.82944	0.82974	0.999986	15930	0	-0.66082
TMEM9B	4	0.046555	0.11281	0.967013	2243	1	-11377
TEF	4	0.61965	0.66198	0.999986	12648	1	-0.28612
HOXB2	4	0.97053	0.97074	0.999986	18710	0	-0.71723
WSCD1	4	0.92003	0.92031	0.999986	17667	0	-0.6182
ENTPD1	4	0.97045	0.97067	0.999986	18709	0	-0.74247
KCNG2	4	0.97045	0.97067	0.999986	18708	0	-0.59619
PCDHGB2	4	0.97044	0.97066	0.999986	18707	0	-0.41848
ZNF664-FAM101A	4	0.64741	0.67936	0.999986	13003	1	-0.78232
THPO	4	0.89248	0.89268	0.999986	17164	0	-0.96223
GCC1	4	0.12838	0.25329	0.999776	4883	2	0.08614
CD34	4	0.97032	0.97054	0.999986	18706	0	-0.87372
LOC101927322	4	0.78238	0.78339	0.999986	15000	1	-0.82734
KIAA1210	4	0.97029	0.97051	0.999986	18704	0	-0.53918
CREBBP	4	0.82587	0.82621	0.999986	15859	0	-11745
FAM175A	4	0.64715	0.67919	0.999986	12998	1	-0.62473
WFS1	4	0.33495	0.47496	0.999986	9091	2	0.29722
CYTH2	4	0.97024	0.97045	0.999986	18703	0	-0.91426
IL17B	4	0.9702	0.97041	0.999986	18702	0	-0.8483
C4A	4	0.52296	0.60771	0.999986	11578	1	-23433
TJAP1	4	0.23631	0.36944	0.999986	7048	1	-0.85358
OR2H2	4	0.46919	0.58109	0.999986	11070	1	-0.75185
DCSTAMP	4	0.9701	0.97032	0.999986	18700	0	-15662
DGKD	4	0.51561	0.60394	0.999986	11504	1	-0.90465
KIF13B	4	0.9701	0.97031	0.999986	18699	0	-0.90111
C4orf33	4	0.17403	0.30248	0.999986	5813	1	-0.79275
MBD5	4	0.80947	0.80981	0.999986	15514	0	-0.77062
HP	4	0.13829	0.26402	0.999776	5108	1	-0.54741
SFTPD	4	0.77165	0.77339	0.999986	14821	1	-0.79849
DNAJC28	4	0.021662	0.061183	0.925766	1274	3	0.69124
GUSB	4	0.96997	0.97017	0.999986	18697	0	-0.72112
SPACA5	4	0.85528	0.85568	0.999986	16406	0	-0.56904
SPIN2B	4	0.7642	0.76682	0.999986	14676	1	-0.59125
CLVS2	4	0.52226	0.60738	0.999986	11572	1	-11399
TSKU	4	0.93901	0.93923	0.999986	18026	0	-11744
2001-12-01	4	0.095251	0.20586	0.996885	3987	3	0.34274
ADGRG4	4	0.76043	0.76361	0.999986	14613	1	-0.7977
AGAP4	4	0.96982	0.97001	0.999986	18694	0	-13682
NPHS2	4	0.96982	0.97001	0.999986	18693	0	-0.87212
NAIF1	4	0.96981	0.96999	0.999986	18692	0	-0.66103
OGDH	4	0.9698	0.96998	0.999986	18691	0	-12862
ABHD12B	4	0.33029	0.46997	0.999986	8995	1	-0.21959
SYCP1	4	0.83921	0.83955	0.999986	16116	0	-0.41278
APBA3	4	0.92067	0.92095	0.999986	17683	0	-0.69308
SUPV3L1	4	0.83864	0.83894	0.999986	16105	0	-0.83123
RTP1	4	0.9697	0.96988	0.999986	18690	0	-0.5952
GSTM3	4	0.80459	0.80495	0.999986	15419	0	-0.63227
EFNA1	4	0.80528	0.80563	0.999986	15431	0	-0.81749
SEC31A	4	0.96968	0.96986	0.999986	18689	0	-0.78045
B3GAT1	4	0.45708	0.57529	0.999986	10959	1	-0.54809
PARG	4	0.50813	0.60014	0.999986	11442	1	-11324
TRPM7	4	0.85893	0.85928	0.999986	16477	0	-0.07446
OR2T35	4	0.27013	0.4054	0.999986	7736	1	-0.97863
TM2D3	4	0.96956	0.96975	0.999986	18688	0	-0.4084
NOD1	4	0.18489	0.31412	0.999986	6036	2	-0.16293
GOSR2	4	0.96947	0.96966	0.999986	18687	0	-11998
PSMB8	4	0.59597	0.64781	0.999986	12365	1	-0.85281
GABRA3	4	0.081209	0.17984	0.993283	3506	1	-0.88898
NOX3	4	0.96945	0.96965	0.999986	18686	0	-10826
PCDHB7	4	0.96945	0.96965	0.999986	18685	0	-0.47055
UGT1A5	4	0.41804	0.55743	0.999986	10638	1	-0.46702
HR	4	0.96944	0.96963	0.999986	18684	0	-0.54775
KISS1R	4	0.96944	0.96962	0.999986	18683	0	-0.59464
TFE3	4	0.78794	0.78861	0.999986	15095	1	-0.98246
SRY	4	0.9694	0.96959	0.999986	18682	0	-0.38857
DEFB123	4	0.40765	0.55279	0.999986	10542	1	-0.32476
PGD	4	0.96939	0.96958	0.999986	18681	0	-26155
GNB5	4	0.95616	0.95637	0.999986	18404	0	-10185
MMACHC	4	0.21706	0.34882	0.999986	6656	1	-0.62975
PDAP1	4	0.75918	0.76256	0.999986	14595	1	-21444
KIAA0586	4	0.96935	0.96954	0.999986	18680	0	-0.52271
PRKAG2	4	0.96933	0.96953	0.999986	18679	0	-0.46534
SMAP1	4	0.61375	0.65836	0.999986	12571	1	-0.72968
BICD2	4	0.96929	0.9695	0.999986	18678	0	-0.50738
CD46	4	0.96927	0.96947	0.999986	18677	0	-0.53796
LAMP5	4	0.88784	0.88803	0.999986	17070	0	-0.037369
COPG1	4	0.064469	0.1479	0.982162	2915	1	-32112
IL17REL	4	0.64871	0.68026	0.999986	13023	1	-0.78054
LYG1	4	0.12399	0.24853	0.999776	4793	2	0.19113
SYNPO2	4	0.22204	0.35416	0.999986	6747	1	-0.68247
FAM193B	4	0.95702	0.95723	0.999986	18422	0	-0.9733
C10orf10	4	0.96907	0.96926	0.999986	18676	0	-0.77483
KCNIP4	4	0.04496	0.10954	0.967013	2174	2	0.096015
LCN12	4	0.96899	0.96919	0.999986	18675	0	-0.43371
PPARGC1A	4	0.28212	0.41831	0.999986	8007	2	-0.22888
DNMBP	4	0.87979	0.88009	0.999986	16906	0	-0.57878
HIST1H2BA	4	0.87253	0.87283	0.999986	16763	0	-0.50155
KCNH3	4	0.056269	0.13197	0.982162	2597	2	-0.727
KIAA0391	4	0.0085812	0.029024	0.912258	604	3	0.87702
KRTCAP2	4	0.96892	0.96912	0.999986	18674	0	-0.38932
RNF215	4	0.62285	0.66396	0.999986	12683	1	-13054
HNRNPA0	4	0.95884	0.95906	0.999986	18464	0	-0.82248
MAN2A2	4	0.1309	0.25599	0.999776	4934	2	0.39987
TP53I11	4	0.23435	0.36737	0.999986	7011	2	0.38217
ITPK1	4	0.96885	0.96906	0.999986	18673	0	-0.85703
GNPDA1	4	0.7653	0.76775	0.999986	14691	1	-0.51428
PRDX3	4	0.22618	0.3586	0.999986	6842	1	-0.74967
OR4S1	4	0.58072	0.63903	0.999986	12196	1	-0.29596
Control_248	4	0.46575	0.5794	0.999986	11038	1	-0.76388
SFRP5	4	0.58204	0.63975	0.999986	12206	1	-0.65904
C4orf45	4	0.76465	0.7672	0.999986	14683	1	-0.73709
KLHL23	4	0.62414	0.66474	0.999986	12697	1	-0.66116
RIMS2	4	0.55454	0.62438	0.999986	11902	1	-0.60568
RPS27	4	0.95578	0.956	0.999986	18397	0	-33722
CARD14	4	0.78121	0.78227	0.999986	14983	1	0.026709
THOC5	4	0.17595	0.30452	0.999986	5851	1	-1201
KDM3B	4	0.38042	0.52344	0.999986	10024	2	-0.58362
KRTAP24-1	4	0.60707	0.65434	0.999986	12502	1	-0.62597
FTHL17	4	0.65688	0.68561	0.999986	13124	1	-0.46855
FSTL1	4	0.35318	0.49441	0.999986	9444	2	-0.38679
CLK2	4	0.68547	0.70506	0.999986	13494	1	-11414
NEO1	4	0.37882	0.52169	0.999986	9993	1	-0.30805
RAB3B	4	0.56734	0.63147	0.999986	12034	1	-0.42343
ZNRF3	4	0.71841	0.7295	0.999986	13974	1	-0.97748
GRM3	4	0.11684	0.24081	0.999721	4661	1	-0.53607
LOC403312	4	0.24032	0.37372	0.999986	7129	2	-0.44769
PSMG2	4	0.037302	0.093955	0.960767	1890	2	0.37842
PRDX5	4	0.60902	0.65551	0.999986	12519	1	-0.61785
CCT8L2	4	0.58002	0.63863	0.999986	12184	1	-0.70797
SLC5A10	4	0.70195	0.71712	0.999986	13717	1	-0.97121
ALG10	4	0.96877	0.96896	0.999986	18671	0	-0.82359
KRT28	4	0.92932	0.92956	0.999986	17845	0	-0.5774
2004-03-01	4	0.49474	0.59339	0.999986	11304	1	-0.6758
KCNA6	4	0.80785	0.80823	0.999986	15481	0	-0.83028
STAT3	4	0.29763	0.43502	0.999986	8297	2	-0.91774
SCAMP5	4	0.72812	0.73717	0.999986	14112	1	-0.70554
SAP30	4	0.84152	0.84187	0.999986	16163	0	-10521
LIMS3L	4	0.093075	0.20183	0.996885	3905	2	-32148
PRPF18	4	0.16274	0.29033	0.999986	5600	1	-0.34695
OR56B4	4	0.0034305	0.012159	0.838344	274	1	-0.34791
GPR33	4	0.88702	0.88723	0.999986	17052	0	-0.74255
KRT31	4	0.90268	0.90294	0.999986	17351	0	-10993
C16orf87	4	0.043412	0.1064	0.967013	2121	2	0.11241
MAP2K3	4	0.88337	0.88365	0.999986	16976	0	-0.73609
[truncated: 17,365 more rows]

## Sheet: CBK77_B_vs_Control.gene_summary
id	num	pos|score	pos|p-value	pos|fdr	pos|rank	pos|goodsgrna	pos|lfc
BFAR	4	0.11529	0.24066	0.995611	4672	2	-0.53047
RPN2	4	0.052671	0.12502	0.987134	2390	1	-1566
GPRC5C	4	0.99997	0.99997	0.999972	19364	0	-19015
IVNS1ABP	4	0.99996	0.99996	0.999972	19363	0	-18189
NPY4R	4	0.99996	0.99996	0.999972	19362	0	-16955
ANK2	4	0.42854	0.56473	0.999533	10822	1	-18611
RPS6KB1	4	0.59754	0.65039	0.999533	12501	1	-15438
39142	4	0.66024	0.68905	0.999533	13249	1	-0.53136
WDR24	4	0.83275	0.83308	0.999533	15970	0	-12866
CACYBP	4	0.9017	0.90196	0.999533	17341	0	-28708
GSTO1	4	0.99785	0.99786	0.999533	19326	0	-27248
SPATA13	4	0.99991	0.99992	0.999972	19361	0	-19748
CCND2	4	0.80407	0.80443	0.999533	15396	1	-0.61683
ENTHD1	4	0.24321	0.37755	0.999533	7216	2	-0.88342
CASP1	4	0.99987	0.99988	0.999972	19360	0	-12114
SH2D6	4	0.17035	0.29974	0.999533	5757	1	-0.39981
CFAP74	4	0.03282	0.085003	0.987134	1627	2	-0.29757
KRTAP4-2	4	0.22105	0.35403	0.999533	6762	1	-13904
GOT1	4	0.98292	0.98308	0.999533	18997	0	-16925
PIP	4	0.27416	0.41046	0.999533	7835	1	-10547
DZIP1L	4	0.99981	0.99982	0.999972	19359	0	-1.31
FAM177A1	4	0.63192	0.67098	0.999533	12892	1	-0.8322
UBXN6	4	0.65621	0.68647	0.999533	13195	1	-0.25311
AHRR	4	0.97157	0.97176	0.999533	18740	0	-10678
MPHOSPH8	4	0.98766	0.98767	0.999533	19101	0	-23462
VRK2	4	0.41921	0.56059	0.999533	10743	1	-13102
ASB8	4	0.99817	0.99819	0.999533	19338	0	-10657
POLR2M	4	0.99379	0.99379	0.999533	19242	0	-23487
NMNAT1	4	0.99968	0.99969	0.999972	19358	0	-1513
SDR16C5	4	0.99902	0.99903	0.999802	19349	0	-13181
MRPL53	4	0.92491	0.92518	0.999533	17801	0	-16717
OR6F1	4	0.99704	0.99706	0.999533	19307	0	-11738
GNB5	4	0.98957	0.98958	0.999533	19136	0	-21001
L3HYPDH	4	0.99962	0.99962	0.999972	19357	0	-14411
OGDHL	4	0.30036	0.43843	0.999533	8388	2	0.084988
TRIM4	4	0.99624	0.99626	0.999533	19290	0	-12728
SGK223	4	0.94796	0.9482	0.999533	18256	0	-0.98572
NXPH2	4	0.64504	0.67921	0.999533	13068	1	-0.3405
FGF13	4	0.99801	0.99803	0.999533	19331	0	-11364
BRD2	4	0.97867	0.97889	0.999533	18910	0	-16203
OR4X2	4	0.95935	0.95961	0.999533	18490	0	-0.97066
THOC2	4	0.98327	0.98341	0.999533	19009	0	-1607
ARRDC3	4	0.50151	0.59902	0.999533	11502	1	-12483
USMG5	4	0.99947	0.99948	0.999894	19356	0	-16496
ANGPT1	4	0.12803	0.25436	0.995793	4944	2	-0.32683
GJA5	4	0.83549	0.83577	0.999533	16025	0	-0.11981
APH1A	4	0.11872	0.24434	0.995611	4735	1	-0.63825
PTPRN	4	0.58736	0.64459	0.999533	12391	1	-15651
DNAH12	4	0.5328	0.61485	0.999533	11803	1	-1242
ISCA1	4	0.86982	0.87013	0.999533	16693	0	-3045
PREP	4	0.9994	0.99942	0.999882	19355	0	-1014
CAV3	4	0.9353	0.93559	0.999533	18000	0	-0.88076
EDIL3	4	0.99939	0.99941	0.999882	19354	0	-11262
KDM6A	4	0.95506	0.95527	0.999533	18401	0	-0.9998
KRTAP20-1	4	0.61217	0.65901	0.999533	12654	1	-13527
TGFB1I1	4	0.98692	0.98694	0.999533	19087	0	-20876
JAG1	4	0.064375	0.14784	0.987134	2872	2	0.35897
CDRT15L2	4	0.01789	0.053312	0.979013	1048	2	-0.3776
SIGLEC10	4	0.32388	0.4635	0.999533	8842	1	-1348
MYO1C	4	0.99335	0.99335	0.999533	19228	0	-18292
PPHLN1	4	0.99562	0.9956	0.999533	19279	0	-18578
SAMD10	4	0.99927	0.99928	0.999846	19353	0	-1668
ANKRD27	4	0.10039	0.21519	0.992754	4192	3	0.32796
OXER1	4	0.40601	0.55106	0.999533	10564	2	-0.95479
RGS11	4	0.91118	0.91149	0.999533	17540	0	-12741
DUS2	4	0.72327	0.73407	0.999533	14045	1	-16322
PEA15	4	0.99918	0.99919	0.999808	19352	0	-12151
ENGASE	4	0.99918	0.99918	0.999808	19351	0	-13122
MLXIPL	4	0.996	0.996	0.999533	19285	0	-17264
NRAP	4	0.065893	0.15085	0.987134	2932	1	-1131
SMCR8	4	0.082348	0.18209	0.987134	3548	2	0.30494
DDX4	4	0.99912	0.99913	0.999808	19350	0	-10065
SYT17	4	0.89676	0.89699	0.999533	17229	0	-0.80742
VPS25	4	0.86776	0.86804	0.999533	16654	0	-28066
CCR7	4	0.41189	0.55739	0.999533	10678	1	-11764
ASPH	4	0.80359	0.80396	0.999533	15386	1	-0.41138
PPP1R15A	4	0.33798	0.47851	0.999533	9138	1	-14439
OXCT1	4	0.71064	0.72449	0.999533	13881	1	-0.84915
UBA6	4	0.19867	0.33004	0.999533	6326	1	-11752
RPS6KA1	4	0.43751	0.5687	0.999533	10907	1	-0.16807
EDDM3B	4	0.9035	0.90373	0.999533	17378	0	-12189
SPOCK2	4	0.96635	0.96657	0.999533	18620	0	-16791
VPS45	4	0.99894	0.99895	0.999773	19348	0	-19174
CDA	4	0.2399	0.3741	0.999533	7152	2	-0.16584
ZNF84	4	0.9989	0.9989	0.999773	19347	0	-0.94914
TSPAN17	4	0.02545	0.069481	0.987134	1324	1	0.0011853
RAD51D	4	0.95517	0.95538	0.999533	18404	0	-15104
KRTAP9-9	4	0.61252	0.6592	0.999533	12661	1	-23717
KIF5A	4	0.87986	0.88016	0.999533	16872	0	-1362
PF4V1	4	0.64274	0.67774	0.999533	13035	1	-0.67742
DHH	4	0.99878	0.99878	0.999706	19346	0	-0.93894
C1orf216	4	0.56738	0.63336	0.999533	12173	1	-0.83539
ASNA1	4	0.94834	0.94857	0.999533	18264	0	-13184
PLEKHS1	4	0.67384	0.69811	0.999533	13414	1	-0.93491
CDK5	4	0.8642	0.86449	0.999533	16595	0	-16925
KRTAP19-4	4	0.80805	0.80843	0.999533	15474	0	-0.49602
TRMT112	4	0.99869	0.9987	0.999678	19345	0	-22928
TBC1D2B	4	0.78366	0.78478	0.999533	15015	1	-10639
CCDC154	4	0.98863	0.98862	0.999533	19119	0	-12421
FAN1	4	0.17398	0.30362	0.999533	5826	2	-0.091154
TARP	4	0.021391	0.060866	0.987134	1173	2	-0.4201
SHARPIN	4	0.99866	0.99865	0.999678	19344	0	-14046
Control_31	4	0.99801	0.99803	0.999533	19330	0	-14155
PIH1D1	4	0.76581	0.76859	0.999533	14709	1	-0.12974
MRPL51	4	0.79549	0.79596	0.999533	15242	1	-13987
IMP3	4	0.99856	0.99857	0.999649	19343	0	-21044
COL6A5	4	0.30099	0.43912	0.999533	8403	1	-0.67094
P4HB	4	0.97116	0.97136	0.999533	18732	0	-0.94016
TAS1R2	4	0.61891	0.66306	0.999533	12744	1	-0.99677
RGR	4	0.99717	0.99717	0.999533	19313	0	-13856
ASTN1	4	0.1143	0.23961	0.995611	4650	2	0.17107
MAP2K2	4	0.98897	0.98896	0.999533	19125	0	-13533
CDC34	4	0.88473	0.88496	0.999533	16982	0	-10945
SMR3B	4	0.99847	0.99848	0.999617	19342	0	-14881
ZC3H12C	4	0.19811	0.32943	0.999533	6312	2	-0.41969
STK19	4	0.99845	0.99846	0.999617	19341	0	-0.89157
TTC8	4	0.13967	0.26689	0.998885	5169	1	-0.38749
PGRMC1	4	0.96183	0.96203	0.999533	18529	0	-12497
LAMA1	4	0.92984	0.93008	0.999533	17898	0	-0.66648
ZNF365	4	0.99839	0.99841	0.999617	19340	0	-0.87362
POLR2C	4	0.99839	0.99841	0.999617	19339	0	-32107
TMEM64	4	0.79219	0.79277	0.999533	15181	1	-0.88696
SEC23A	4	0.73004	0.73931	0.999533	14141	1	-0.81645
CA1	4	0.022215	0.062632	0.987134	1212	2	0.42594
SRPK3	4	0.92884	0.92909	0.999533	17882	0	-17569
FAM168B	4	0.95748	0.9577	0.999533	18457	0	-14459
NUDT13	4	0.96531	0.9655	0.999533	18599	0	-0.50343
PLA2G1B	4	0.98537	0.98547	0.999533	19054	0	-13491
ZNF783	4	0.35674	0.49841	0.999533	9543	2	-0.94425
LOC102724279	4	0.45502	0.57677	0.999533	11067	1	-0.2704
MMP20	4	0.84166	0.842	0.999533	16154	0	-0.86755
SPATA31E1	4	0.99816	0.99818	0.999533	19337	0	-10874
PRDM2	4	0.99814	0.99816	0.999533	19336	0	-0.9478
NFE2L1	4	0.99814	0.99816	0.999533	19335	0	-10566
NNT	4	0.11123	0.23473	0.995611	4543	2	-13224
ZSCAN29	4	0.99811	0.99813	0.999533	19334	0	-10057
NAPEPLD	4	0.97775	0.97794	0.999533	18889	0	-12783
C6orf1	4	0.2562	0.39128	0.999533	7471	1	-11603
FARS2	4	0.69961	0.71643	0.999533	13747	1	-15025
DPM1	4	0.99805	0.99807	0.999533	19333	0	-0.97267
OR10J5	4	0.99804	0.99806	0.999533	19332	0	-0.83454
DNAJB7	4	0.61928	0.66329	0.999533	12749	1	-13168
BRCA2	4	0.75125	0.75638	0.999533	14466	1	-1396
RIC1	4	0.99688	0.99689	0.999533	19303	0	-0.90598
C1GALT1C1L	4	0.62775	0.66845	0.999533	12843	1	-0.33712
FICD	4	0.99801	0.99802	0.999533	19329	0	-0.82416
Control_161	4	0.59601	0.64953	0.999533	12483	1	-14125
LILRA1	4	0.73611	0.7441	0.999533	14223	1	-1073
CNIH1	4	0.48006	0.58865	0.999533	11308	1	-10908
CYC1	4	0.99791	0.99792	0.999533	19328	0	-20545
Control_180	4	0.90684	0.90716	0.999533	17453	0	-0.43701
TPX2	4	0.20669	0.33867	0.999533	6473	1	-34588
TUBD1	4	0.9979	0.99791	0.999533	19327	0	-29029
HIATL1	4	0.165	0.29398	0.999533	5649	1	-0.9048
TMEM45A	4	0.41573	0.55909	0.999533	10710	1	-21646
MAF1	4	0.99766	0.99766	0.999533	19319	0	-1.27
LZTFL1	4	0.83085	0.83118	0.999533	15929	0	-0.4485
SCN3B	4	0.9978	0.99781	0.999533	19325	0	-0.76946
SH3GL3	4	0.9978	0.99781	0.999533	19324	0	-12111
GTF2H3	4	0.99779	0.9978	0.999533	19323	0	-15189
OR8H3	4	0.99773	0.99773	0.999533	19322	0	-14108
DAZ3	4	0.35141	0.49282	0.999533	9425	1	0.052828
RBM4	4	0.9977	0.9977	0.999533	19321	0	-21626
BOLA2	4	0.99769	0.99769	0.999533	19320	0	-13265
APOOL	4	0.89553	0.89574	0.999533	17198	0	-0.89209
DEFB1	4	0.75039	0.75568	0.999533	14452	1	-0.93247
FAM32A	4	0.003688	0.013031	0.855244	293	2	-0.41855
ADARB1	4	0.95631	0.95653	0.999533	18436	0	-0.58317
STARD10	4	0.81655	0.81688	0.999533	15650	0	-0.87792
SLC26A10	4	0.58845	0.64519	0.999533	12403	1	-13093
IL4	4	0.77846	0.7799	0.999533	14924	1	-0.75293
KRTAP10-6	4	0.99752	0.99751	0.999533	19318	0	-10005
KLHL13	4	0.92571	0.92599	0.999533	17817	0	-15571
PER2	4	0.60189	0.65293	0.999533	12550	1	-0.62951
FER	4	0.80744	0.80784	0.999533	15457	0	-12725
OR5M10	4	0.6208	0.66423	0.999533	12766	1	-16236
USPL1	4	0.77678	0.77837	0.999533	14890	1	-1716
TAP2	4	0.95743	0.95765	0.999533	18456	0	-0.38304
OR5T3	4	0.95753	0.95775	0.999533	18458	0	-0.31823
OR4F4	4	0.77831	0.77976	0.999533	14921	1	-24785
SETD1B	4	0.97722	0.97739	0.999533	18876	0	-0.95482
MYL12A	4	0.32849	0.46843	0.999533	8941	1	-0.79581
CDH23	4	0.98261	0.98278	0.999533	18989	0	-13944
ABTB2	4	0.86957	0.86987	0.999533	16687	0	-0.67055
MUM1L1	4	0.38739	0.531	0.999533	10162	2	0.053565
SLC18A1	4	0.99728	0.99728	0.999533	19317	0	-15753
PYCRL	4	0.98584	0.98592	0.999533	19064	0	-10134
INO80D	4	0.99726	0.99727	0.999533	19316	0	-0.81967
TRUB2	4	0.53534	0.61613	0.999533	11833	1	-11023
ZHX1-C8orf76	4	0.62545	0.66707	0.999533	12815	1	-0.42245
RSPO3	4	0.81199	0.81235	0.999533	15550	0	-13597
DUSP1	4	0.34954	0.49084	0.999533	9381	1	-14631
KRTAP16-1	4	0.99721	0.99721	0.999533	19315	0	-0.74322
HIVEP3	4	0.9972	0.9972	0.999533	19314	0	-0.68313
ADORA2B	4	0.44807	0.57353	0.999533	11001	1	-0.28529
F13B	4	0.46442	0.5812	0.999533	11149	1	-0.97014
C16orf89	4	0.51844	0.60754	0.999533	11668	1	-11389
PWP2	4	0.74656	0.75252	0.999533	14391	1	-35127
FBXO24	4	0.75444	0.759	0.999533	14512	1	-0.4626
GPR68	4	0.99714	0.99714	0.999533	19312	0	-0.68444
ARHGEF1	4	0.11527	0.24064	0.995611	4670	2	-0.068601
STARD3	4	0.99711	0.99711	0.999533	19311	0	-11057
UGT3A1	4	0.99711	0.99711	0.999533	19310	0	-16607
POC1B-GALNT4	4	0.98656	0.9866	0.999533	19078	0	-15054
DONSON	4	0.9971	0.9971	0.999533	19309	0	-42606
MEF2BNB	4	0.9971	0.9971	0.999533	19308	0	-15047
OR5D16	4	0.96075	0.961	0.999533	18515	0	-10281
TAF7L	4	0.23644	0.37042	0.999533	7079	1	-15075
CHRM4	4	0.23712	0.37115	0.999533	7090	1	-0.17036
FOXP1	4	0.95908	0.95933	0.999533	18482	0	-12069
MAPKBP1	4	0.40838	0.55359	0.999533	10603	1	-0.92626
TGFBI	4	0.9092	0.90952	0.999533	17498	0	-11334
GRXCR1	4	0.9797	0.9799	0.999533	18931	0	-15331
MRPL52	4	0.7437	0.75023	0.999533	14347	1	-18547
N4BP1	4	0.29501	0.43272	0.999533	8276	1	-11064
YAF2	4	0.05272	0.12511	0.987134	2392	1	-1283
PTPN14	4	0.8007	0.8011	0.999533	15328	1	-0.66209
ITGAX	4	0.68268	0.7042	0.999533	13525	1	-0.37693
PFN4	4	0.99693	0.99694	0.999533	19306	0	-0.90398
HBP1	4	0.82314	0.8235	0.999533	15763	0	-0.63163
MRPL24	4	0.99692	0.99694	0.999533	19304	0	-13239
COPS4	4	0.99692	0.99694	0.999533	19305	0	-33613
PRAMEF7	4	0.58215	0.64158	0.999533	12337	1	-10209
CLSTN1	4	0.79892	0.79935	0.999533	15301	1	-0.93379
RAG2	4	0.97575	0.97596	0.999533	18840	0	-14103
CYP3A7	4	0.087639	0.19185	0.987134	3759	1	-0.020793
C16orf52	4	0.99688	0.99689	0.999533	19302	0	-0.66248
IL2RG	4	0.0023997	0.0086383	0.834292	197	1	-0.38303
TOPBP1	4	0.039592	0.098813	0.987134	1886	2	-0.81991
ADRBK2	4	0.9968	0.99681	0.999533	19301	0	-0.84431
C17orf89	4	0.40104	0.54574	0.999533	10453	2	-0.60992
DOK3	4	0.96003	0.96027	0.999533	18503	0	-10934
DUOX1	4	0.99674	0.99675	0.999533	19300	0	-10683
NCKAP1L	4	0.9364	0.93663	0.999533	18027	0	-15419
BIVM-ERCC5	4	0.92761	0.92789	0.999533	17855	0	-13001
TEKT2	4	0.99671	0.99672	0.999533	19299	0	-10921
KDF1	4	0.98308	0.98322	0.999533	19002	0	-1168
RNF148	4	0.99668	0.99669	0.999533	19298	0	-0.94389
LGI4	4	0.080239	0.17811	0.987134	3466	1	-14542
SKA3	4	0.52917	0.613	0.999533	11770	1	-11054
HPR	4	0.43449	0.5674	0.999533	10879	1	-0.57764
ANKRD13A	4	0.92317	0.92348	0.999533	17765	0	-0.82108
SNX1	4	0.49489	0.59573	0.999533	11442	1	-0.84138
RWDD3	4	0.99657	0.99658	0.999533	19297	0	-0.66235
UBE4A	4	0.80396	0.80432	0.999533	15393	1	-0.69859
BUD31	4	0.99484	0.99485	0.999533	19259	0	-17949
MAGED1	4	0.8268	0.82718	0.999533	15847	0	-13207
TAF8	4	0.66133	0.68976	0.999533	13264	1	-16621
CPNE7	4	0.0369	0.093339	0.987134	1789	1	-0.068684
POP1	4	0.99646	0.99646	0.999533	19296	0	-20335
HSD11B1L	4	0.99644	0.99645	0.999533	19295	0	-12441
TENM1	4	0.70683	0.72161	0.999533	13846	1	-10333
RPA3	4	0.83695	0.83726	0.999533	16050	0	-0.90074
DDHD2	4	0.95551	0.95571	0.999533	18411	0	-0.99648
PPY	4	0.98149	0.98168	0.999533	18959	0	-1115
COX6A2	4	0.9001	0.90032	0.999533	17306	0	-0.95141
SOGA1	4	0.99637	0.99638	0.999533	19294	0	-11304
FEZ1	4	0.25724	0.39238	0.999533	7497	2	-0.2073
N4BP2L1	4	0.99633	0.99635	0.999533	19293	0	-0.7786
KLK11	4	0.29608	0.43388	0.999533	8290	1	-0.92537
HSPA4L	4	0.98248	0.98266	0.999533	18985	0	-11801
PCSK2	4	0.99632	0.99634	0.999533	19292	0	-0.81333
C15orf56	4	0.8736	0.8739	0.999533	16753	0	-0.55927
MROH5	4	0.99631	0.99632	0.999533	19291	0	-0.98463
C11orf1	4	0.76733	0.76991	0.999533	14731	1	-13252
BIN2	4	0.80302	0.80342	0.999533	15376	1	-0.76558
WAS	4	0.84528	0.84557	0.999533	16231	0	-0.67184
DGKZ	4	0.99623	0.99624	0.999533	19289	0	-10724
NCR2	4	0.51239	0.60448	0.999533	11605	1	-10096
FAM47E	4	0.072452	0.16348	0.987134	3164	1	-11945
PPARA	4	0.82749	0.82783	0.999533	15857	0	-0.70226
MMRN1	4	0.57627	0.63833	0.999533	12263	1	-0.99893
IGFBPL1	4	0.86437	0.86467	0.999533	16598	0	-0.87259
MORC2	4	0.71113	0.72484	0.999533	13888	1	-0.53462
MICALCL	4	0.99611	0.99611	0.999533	19288	0	-0.915
APOA1BP	4	0.71176	0.7253	0.999533	13894	1	-0.88541
AANAT	4	0.71017	0.72411	0.999533	13878	1	0.02859
VDAC2	4	0.69738	0.71477	0.999533	13721	1	-12845
HOXD13	4	0.99604	0.99604	0.999533	19287	0	-0.79162
RPF2	4	0.99603	0.99603	0.999533	19286	0	-13185
HLA-DMA	4	0.099443	0.21345	0.992754	4159	2	-0.10616
CHD4	4	0.99599	0.99599	0.999533	19284	0	-31969
PEX1	4	0.46961	0.58368	0.999533	11199	1	-0.73711
CALCR	4	0.91697	0.9173	0.999533	17654	0	-13177
E2F6	4	0.81218	0.81253	0.999533	15556	0	-0.9879
STAT5A	4	0.18925	0.31994	0.999533	6136	2	-0.73744
SPRYD4	4	0.99591	0.9959	0.999533	19283	0	-17362
EIF1	4	0.33365	0.47396	0.999533	9041	1	-16086
PPP1R26	4	0.032373	0.084064	0.987134	1604	1	-0.67348
RRAS2	4	0.66872	0.69464	0.999533	13344	1	-10206
ADCYAP1	4	0.505	0.60072	0.999533	11535	1	-11739
GM2A	4	0.1463	0.27408	0.999533	5296	1	-0.69167
MSH3	4	0.73514	0.74333	0.999533	14212	1	-1105
GAGE12C	4	0.34628	0.48736	0.999533	9317	1	-0.14267
MED17	4	0.73508	0.74328	0.999533	14210	1	-19787
SULT4A1	4	0.206	0.33791	0.999533	6462	1	-0.64735
GPR156	4	0.83742	0.83773	0.999533	16060	0	-12898
SEC22C	4	0.72549	0.73578	0.999533	14072	1	-0.63359
HTATSF1	4	0.9561	0.95631	0.999533	18428	0	-15574
ZNF41	4	0.99572	0.99571	0.999533	19282	0	-0.84244
MBTPS1	4	0.054866	0.12935	0.987134	2478	2	-29629
LOC101060389	4	0.39341	0.53743	0.999533	10294	1	-30701
TRIM67	4	0.99565	0.99563	0.999533	19281	0	-10577
SPINK9	4	0.33156	0.47172	0.999533	8998	2	-0.17798
CLTCL1	4	0.96934	0.96954	0.999533	18688	0	-14068
MTFR1L	4	0.99562	0.9956	0.999533	19280	0	-1.06
EIF3M	4	0.98237	0.98256	0.999533	18981	0	-12351
ADGRF3	4	0.3055	0.44391	0.999533	8489	2	-0.36571
ZNF257	4	0.9956	0.99558	0.999533	19278	0	-0.79343
ATG7	4	0.69486	0.71294	0.999533	13683	1	-1062
TAF9	4	0.99038	0.99041	0.999533	19161	0	-13441
TBC1D29	4	0.93294	0.93321	0.999533	17954	0	-10115
PFDN1	4	0.24317	0.37751	0.999533	7215	2	0.26877
NARS2	4	0.99159	0.99161	0.999533	19190	0	-17564
INTS7	4	0.9955	0.9955	0.999533	19277	0	-18572
EPS8L3	4	0.16378	0.29269	0.999533	5624	2	0.055285
OR13F1	4	0.44906	0.57401	0.999533	11011	1	-0.8426
ADGRG7	4	0.97382	0.97401	0.999533	18790	0	-0.8736
KRTAP4-3	4	0.3564	0.49807	0.999533	9536	1	-0.4423
BDKRB2	4	0.94166	0.94193	0.999533	18122	0	-1079
SAYSD1	4	0.30564	0.44404	0.999533	8496	1	-10979
C12orf65	4	0.98239	0.98258	0.999533	18982	0	-12286
AGPAT9	4	0.8186	0.81896	0.999533	15682	0	-0.901
LECT2	4	0.89212	0.8923	0.999533	17130	0	-0.87049
C12orf10	4	0.99537	0.99537	0.999533	19276	0	-32268
USP9Y	4	0.85179	0.85216	0.999533	16356	0	-11801
HTR1A	4	0.99536	0.99536	0.999533	19275	0	-0.68701
POLR2F	4	0.70717	0.72186	0.999533	13847	1	-28209
ARHGAP10	4	0.8081	0.80848	0.999533	15476	0	-11246
NOMO3	4	0.44559	0.5724	0.999533	10979	1	-0.51627
NTN1	4	0.99529	0.99529	0.999533	19274	0	-0.77786
CRCP	4	0.56012	0.62934	0.999533	12092	1	-11747
NDFIP1	4	0.79255	0.79314	0.999533	15188	1	-0.95032
ARHGAP26	4	0.36261	0.50467	0.999533	9672	1	-1059
ATP5H	4	0.99528	0.99529	0.999533	19273	0	-0.9275
SSX4B	4	0.99525	0.99527	0.999533	19272	0	-0.95064
B2M	4	0.99525	0.99526	0.999533	19271	0	-0.70049
USP19	4	0.42195	0.56183	0.999533	10766	1	-11355
NIPAL2	4	0.90608	0.90637	0.999533	17433	0	-0.075936
ATN1	4	0.99522	0.99523	0.999533	19270	0	-17568
ISCA2	4	0.99522	0.99523	0.999533	19269	0	-0.5362
R3HDM2	4	0.99521	0.99522	0.999533	19268	0	-1.21
TPP2	4	0.76655	0.76925	0.999533	14721	1	-0.39894
EBLN2	4	0.99515	0.99516	0.999533	19267	0	-0.91698
CORO2B	4	0.99513	0.99515	0.999533	19266	0	-0.97769
PIGW	4	0.62686	0.66792	0.999533	12834	1	-0.66505
NGEF	4	0.99036	0.9904	0.999533	19160	0	-0.85488
GRIN2D	4	0.77324	0.77516	0.999533	14828	1	-0.10891
TAGLN2	4	0.97101	0.97121	0.999533	18725	0	-16157
GPS1	4	0.99505	0.99506	0.999533	19265	0	-16299
TRAPPC12	4	0.99504	0.99505	0.999533	19264	0	-0.79804
RAB33A	4	0.83028	0.8306	0.999533	15920	0	-0.73649
ZMAT3	4	0.78494	0.78595	0.999533	15038	1	-0.94783
IFT88	4	0.99499	0.995	0.999533	19263	0	-0.81134
SPTB	4	0.93633	0.93656	0.999533	18025	0	-0.85595
DEFB106A	4	0.045169	0.11015	0.987134	2103	2	-0.059495
SETX	4	0.99493	0.99493	0.999533	19262	0	-0.76014
OR13C8	4	0.97245	0.97265	0.999533	18754	0	-0.30333
MSANTD1	4	0.99489	0.99489	0.999533	19261	0	-0.9372
GMEB1	4	0.053266	0.12621	0.987134	2409	1	-0.7684
GNL2	4	0.99486	0.99487	0.999533	19260	0	-12694
TMUB1	4	0.78533	0.78631	0.999533	15046	1	-0.92308
CPD	4	0.75841	0.76236	0.999533	14574	1	-0.47714
CDH2	4	0.9288	0.92905	0.999533	17880	0	-0.81236
SPACA3	4	0.90643	0.90674	0.999533	17446	0	-0.37299
ZNF57	4	0.39123	0.53507	0.999533	10244	1	-10299
UBR4	4	0.99475	0.99477	0.999533	19258	0	-23247
EMC1	4	0.093075	0.20188	0.99125	3938	1	-1329
COLGALT1	4	0.19337	0.32436	0.999533	6211	1	-15257
SNRPG	4	0.9947	0.99472	0.999533	19257	0	-23669
RALGPS2	4	0.7355	0.74362	0.999533	14217	1	-0.90044
MOCS2	4	0.99019	0.99022	0.999533	19155	0	-10817
CACNA2D2	4	0.94462	0.9449	0.999533	18185	0	-0.74771
C21orf62	4	0.85719	0.85758	0.999533	16469	0	-0.79311
INMT	4	0.40075	0.5454	0.999533	10442	2	-0.69469
SLC25A44	4	0.79094	0.79159	0.999533	15154	1	-13857
WDR5B	4	0.9552	0.9554	0.999533	18405	0	-13704
FAT3	4	0.003875	0.013676	0.864915	302	2	0.45603
PDRG1	4	0.94093	0.94115	0.999533	18106	0	-18351
TEKT3	4	0.95736	0.95757	0.999533	18453	0	-11558
TCF23	4	0.097053	0.20915	0.991984	4076	2	-0.22751
PRR18	4	0.060549	0.14044	0.987134	2718	3	0.40381
DNAAF3	4	0.80867	0.80901	0.999533	15491	0	-10569
RASSF10	4	0.95025	0.95049	0.999533	18300	0	-0.8319
TMEM170B	4	0.99444	0.99445	0.999533	19256	0	-0.672
RNF141	4	0.99443	0.99444	0.999533	19255	0	-0.56448
SRCIN1	4	0.88622	0.88643	0.999533	17017	0	-0.59123
FAM71F1	4	0.90336	0.90361	0.999533	17374	0	-0.83335
OR6T1	4	0.30603	0.44446	0.999533	8506	1	-0.74205
POC1B	4	0.26891	0.40479	0.999533	7736	2	0.2413
ZNF343	4	0.46852	0.58316	0.999533	11186	1	-0.80251
CCL24	4	0.32072	0.46016	0.999533	8786	1	-0.37109
ATP8B2	4	0.99428	0.9943	0.999533	19254	0	-0.61922
ZWILCH	4	0.96929	0.9695	0.999533	18684	0	-10178
GNA11	4	0.2642	0.39983	0.999533	7633	1	-0.88829
CAB39	4	0.96989	0.97008	0.999533	18697	0	-11794
MNX1	4	0.99426	0.99428	0.999533	19253	0	-0.63626
CLCN2	4	0.4285	0.56472	0.999533	10821	1	-16867
CNTF	4	0.90588	0.90616	0.999533	17426	0	-20127
FAM120A	4	0.99425	0.99427	0.999533	19252	0	-0.86123
MTUS2	4	0.65588	0.68624	0.999533	13190	1	-0.56279
KRTAP4-4	4	0.60003	0.65184	0.999533	12529	1	-0.82221
HNRNPH3	4	0.99421	0.99424	0.999533	19251	0	-0.94862
PRR16	4	0.77538	0.77708	0.999533	14865	1	-0.85698
PDLIM7	4	0.99415	0.99418	0.999533	19250	0	-0.76182
KBTBD6	4	0.843	0.84332	0.999533	16177	0	-0.0028327
KCTD3	4	0.78112	0.7824	0.999533	14967	1	-0.95508
TTC24	4	0.99411	0.99414	0.999533	19249	0	-1.03
ECT2	4	0.99411	0.99414	0.999533	19248	0	-25209
NODAL	4	0.49669	0.59664	0.999533	11456	1	-11788
MRPL9	4	0.67527	0.69904	0.999533	13427	1	-0.49911
ACSM3	4	0.45384	0.57623	0.999533	11059	1	-11165
GPN2	4	0.89528	0.89548	0.999533	17190	0	-10611
GJA8	4	0.94418	0.94446	0.999533	18179	0	-15499
PCGF3	4	0.4746	0.58606	0.999533	11257	1	-0.058471
TSC22D3	4	0.99399	0.99401	0.999533	19247	0	-0.97846
CHMP3	4	0.57488	0.63754	0.999533	12248	1	-41569
ACTA2	4	0.1726	0.30213	0.999533	5799	1	-0.76754
CSF1R	4	0.26031	0.39568	0.999533	7560	1	-0.38544
C9orf9	4	0.76059	0.76418	0.999533	14613	1	-12274
SMARCE1	4	0.98127	0.98147	0.999533	18956	0	-0.73894
MCOLN3	4	0.85532	0.85572	0.999533	16424	0	-0.84648
CEP85	4	0.9917	0.99171	0.999533	19194	0	-36691
NUDT4	4	0.9939	0.99392	0.999533	19246	0	-16677
EPO	4	0.036699	0.092946	0.987134	1782	1	-0.93065
CHERP	4	0.99385	0.99386	0.999533	19245	0	-21004
STRN3	4	0.99384	0.99386	0.999533	19244	0	-0.71089
LYRM7	4	0.026557	0.071866	0.987134	1368	3	0.56568
RAB27A	4	0.99384	0.99385	0.999533	19243	0	-0.69257
TP53I13	4	0.876	0.87631	0.999533	16792	0	-0.98157
SCAMP5	4	0.92664	0.9269	0.999533	17834	0	-0.73894
PIF1	4	0.97155	0.97174	0.999533	18739	0	-46779
COPS3	4	0.34767	0.48883	0.999533	9339	2	-14078
HMGCS1	4	0.99372	0.99372	0.999533	19241	0	-18015
TDRD10	4	0.83855	0.83885	0.999533	16088	0	-11068
CCDC116	4	0.59901	0.65124	0.999533	12516	1	-1127
RUVBL2	4	0.9937	0.99371	0.999533	19240	0	-12396
NRARP	4	0.80795	0.80832	0.999533	15472	0	-0.014202
DYNLL1	4	0.68031	0.70254	0.999533	13493	1	-12482
ADH1C	4	0.99368	0.99368	0.999533	19239	0	-0.71104
C15orf41	4	0.99367	0.99368	0.999533	19238	0	-35455
LHX8	4	0.99366	0.99366	0.999533	19237	0	-0.95009
HEATR6	4	0.53962	0.61837	0.999533	11883	1	-14659
MTMR1	4	0.99364	0.99364	0.999533	19236	0	-0.84361
HMGN5	4	0.52218	0.60945	0.999533	11702	1	-0.085457
DHX30	4	0.99361	0.99362	0.999533	19235	0	-11763
COL6A2	4	0.91999	0.92027	0.999533	17715	0	-0.66888
PTPRD	4	0.99358	0.99358	0.999533	19234	0	-11522
FAM127A	4	0.99355	0.99355	0.999533	19233	0	-12131
GSR	4	0.96843	0.96863	0.999533	18657	0	-0.59479
DPYS	4	0.34673	0.48784	0.999533	9327	1	-0.8753
NPAS4	4	0.99345	0.99345	0.999533	19232	0	-0.8027
MS4A8	4	0.99343	0.99344	0.999533	19231	0	-12293
AEN	4	0.36025	0.50212	0.999533	9626	1	-0.68452
Control_125	4	0.33398	0.47433	0.999533	9046	2	-13333
HS3ST2	4	0.99339	0.9934	0.999533	19230	0	-0.51383
FRS3	4	0.99339	0.99339	0.999533	19229	0	-0.6818
FAF2	4	0.93723	0.93748	0.999533	18045	0	-14963
RREB1	4	0.62758	0.66836	0.999533	12841	1	-11342
MAP4K5	4	0.93727	0.93752	0.999533	18046	0	-0.80207
SUGP1	4	0.14018	0.26746	0.998885	5176	1	-16793
LSM12	4	0.67965	0.70206	0.999533	13479	1	-0.96935
C11orf73	4	0.99328	0.99328	0.999533	19227	0	-0.98641
ESF1	4	0.70306	0.71889	0.999533	13794	1	-0.21721
THUMPD3	4	0.98435	0.98449	0.999533	19031	0	-0.73358
GSTM3	4	0.99325	0.99324	0.999533	19226	0	-0.68226
MYL10	4	0.18157	0.31171	0.999533	5975	2	-0.036228
EXOC6	4	0.99314	0.99315	0.999533	19225	0	-12104
TMC5	4	0.99313	0.99314	0.999533	19224	0	-0.89146
PRPF40A	4	0.41265	0.55773	0.999533	10683	1	-2.78
IL7R	4	0.60651	0.65565	0.999533	12596	1	-17733
ZNF22	4	0.99308	0.99308	0.999533	19223	0	-0.8009
CYP27B1	4	0.71209	0.72552	0.999533	13896	1	-14802
CEACAM21	4	0.40326	0.54808	0.999533	10501	1	-16775
ESRP1	4	0.99304	0.99304	0.999533	19222	0	-0.84751
PLA2G6	4	0.89279	0.893	0.999533	17141	0	-13425
RBBP5	4	0.06201	0.14325	0.987134	2782	1	-16024
GPR37	4	0.62498	0.66677	0.999533	12810	1	-0.65007
DUSP6	4	0.90134	0.90162	0.999533	17334	0	-14255
FDXR	4	0.50722	0.60187	0.999533	11556	1	-13796
DHRS11	4	0.99298	0.99298	0.999533	19221	0	-0.61307
FAM114A1	4	0.95501	0.95522	0.999533	18400	0	-0.55612
PAX3	4	0.79293	0.79351	0.999533	15191	1	-0.1974
CFAP69	4	0.99296	0.99295	0.999533	19220	0	-0.68669
VSIG1	4	0.24181	0.37608	0.999533	7194	1	-0.7661
NPR3	4	0.88163	0.88191	0.999533	16900	0	-13014
TMEM120A	4	0.99293	0.99293	0.999533	19219	0	-0.58384
SECISBP2	4	0.88415	0.88442	0.999533	16969	0	-11001
ZNF648	4	0.99291	0.99291	0.999533	19218	0	-11435
FGF6	4	0.97361	0.97381	0.999533	18785	0	-10387
RHPN2	4	0.074478	0.16732	0.987134	3245	2	-0.37279
HYI	4	0.26296	0.3985	0.999533	7608	1	-0.464
IQGAP3	4	0.60143	0.65266	0.999533	12547	1	-12847
NARF	4	0.99284	0.99284	0.999533	19217	0	-0.75564
KANK1	4	0.73892	0.74635	0.999533	14272	1	-1071
DRGX	4	0.38098	0.52418	0.999533	10036	1	-0.074881
C20orf194	4	0.89694	0.89716	0.999533	17233	0	-12255
NDUFA5	4	0.055297	0.13021	0.987134	2495	1	-0.29479
CDIPT	4	0.93891	0.93912	0.999533	18068	0	-15954
NDUFA11	4	0.87284	0.87314	0.999533	16740	0	-11903
OR1J1	4	0.91499	0.91532	0.999533	17618	0	-0.8861
PSMF1	4	0.99265	0.99264	0.999533	19216	0	-0.63845
APC	4	0.4111	0.55657	0.999533	10662	2	-0.76308
EYA3	4	0.99261	0.9926	0.999533	19215	0	-0.89725
ULBP2	4	0.76754	0.7701	0.999533	14735	1	-0.94412
CDC6	4	0.99257	0.99256	0.999533	19214	0	-0.84164
XAB2	4	0.88997	0.89017	0.999533	17085	0	-18482
CHMP7	4	0.49918	0.59787	0.999533	11473	1	-0.093833
CORO2A	4	0.99253	0.99253	0.999533	19213	0	-0.64634
PLEKHH3	4	0.99251	0.99251	0.999533	19212	0	-0.87335
PGLS	4	0.93144	0.9317	0.999533	17922	0	-13664
REV1	4	0.78989	0.79057	0.999533	15129	1	-10777
ATOH1	4	0.41749	0.55985	0.999533	10730	1	-0.44645
COG3	4	0.99244	0.99245	0.999533	19211	0	-17653
KRT15	4	0.18747	0.31803	0.999533	6103	2	0.32162
ACADM	4	0.98176	0.98197	0.999533	18966	0	-0.88163
ELAVL2	4	0.9924	0.9924	0.999533	19210	0	-0.82995
NXPH1	4	0.90258	0.90284	0.999533	17356	0	-0.85576
FAM198A	4	0.11881	0.24444	0.995611	4738	1	-0.85517
SLC7A2	4	0.36372	0.50585	0.999533	9687	1	-1046
GOLGA8R	4	0.99238	0.99238	0.999533	19209	0	-24603
DNM1	4	0.90812	0.9084	0.999533	17478	0	-11947
SYT12	4	0.27169	0.40778	0.999533	7785	2	-0.72895
CASC10	4	0.74317	0.74979	0.999533	14339	1	-0.17223
SEMA3C	4	0.99234	0.99235	0.999533	19208	0	-0.56722
EPHX2	4	0.62834	0.6688	0.999533	12849	1	-0.75102
RRH	4	0.26207	0.39754	0.999533	7588	2	-0.46108
HNRNPDL	4	0.00020986	0.00080352	0.473692	32	3	11404
UGT2B17	4	0.90892	0.90924	0.999533	17494	0	-10089
C16orf72	4	0.99227	0.99227	0.999533	19207	0	-14829
MYADML2	4	0.27375	0.41004	0.999533	7826	1	-0.91943
PNN	4	0.9667	0.96692	0.999533	18624	0	-0.5423
RASSF2	4	0.99224	0.99225	0.999533	19206	0	-10194
GTF3C3	4	0.70113	0.71748	0.999533	13768	1	0.018987
PPP3CA	4	0.40194	0.54668	0.999533	10475	1	-0.80403
ACTC1	4	0.99218	0.99219	0.999533	19205	0	-0.9432
TNFSF9	4	0.2165	0.34914	0.999533	6672	1	-0.67866
OR4S2	4	0.967	0.96723	0.999533	18630	0	-0.77055
GSTA3	4	0.35512	0.49673	0.999533	9505	2	-0.24072
HOMER3	4	0.99209	0.99211	0.999533	19204	0	-0.93614
KITLG	4	0.99208	0.99209	0.999533	19203	0	-0.73781
CLDN3	4	0.97114	0.97134	0.999533	18729	0	-13823
EMP1	4	0.96938	0.96958	0.999533	18690	0	-0.44566
ZCCHC2	4	0.79785	0.7983	0.999533	15283	1	-22884
NDUFV2	4	0.99204	0.99205	0.999533	19202	0	-0.66878
PPEF2	4	0.99201	0.99202	0.999533	19201	0	-10675
BRPF3	4	0.99201	0.99202	0.999533	19200	0	-0.66777
SLC26A8	4	0.98881	0.98881	0.999533	19122	0	-10118
TMF1	4	0.89882	0.89903	0.999533	17274	0	-0.25275
ARL17A	4	0.80484	0.8052	0.999533	15410	1	-34526
TAF3	4	0.46743	0.58264	0.999533	11179	1	-12971
XYLB	4	0.85821	0.85857	0.999533	16488	0	-0.65102
MAP2K7	4	0.88499	0.88522	0.999533	16992	0	-1023
TP53INP2	4	0.88963	0.88983	0.999533	17077	0	-17055
ATR	4	0.99193	0.99195	0.999533	19199	0	-22718
ARID2	4	0.99191	0.99193	0.999533	19198	0	-0.95963
ZRANB3	4	0.99191	0.99193	0.999533	19197	0	-0.53262
NLRP10	4	0.83697	0.83729	0.999533	16052	0	-0.29075
ENTPD1	4	0.99187	0.9919	0.999533	19196	0	-0.9558
NUP85	4	0.96553	0.96573	0.999533	18606	0	-25721
DHDDS	4	0.99182	0.99185	0.999533	19195	0	-38623
CMPK2	4	0.28675	0.42387	0.999533	8112	2	-0.27898
SYNJ2	4	0.43236	0.56645	0.999533	10859	1	-0.89727
MAT2B	4	0.89316	0.89333	0.999533	17150	0	-0.59596
RBM14	4	0.075573	0.1694	0.987134	3295	2	-0.43009
GKN2	4	0.81324	0.81358	0.999533	15589	0	-0.7859
P2RX3	4	0.079996	0.17764	0.987134	3456	2	-0.65098
COX10	4	0.99166	0.99168	0.999533	19193	0	-0.64249
RIMKLA	4	0.99166	0.99168	0.999533	19192	0	-0.65604
ALDH3B1	4	0.99163	0.99164	0.999533	19191	0	-13313
PLCXD3	4	0.83586	0.83615	0.999533	16032	0	-1109
IFNA10	4	0.056237	0.13206	0.987134	2535	1	-0.67799
CMTR2	4	0.81067	0.81105	0.999533	15525	0	-0.30119
RAB33B	4	0.48889	0.59285	0.999533	11382	1	-0.89359
C17orf112	4	0.62305	0.66561	0.999533	12791	1	-0.86058
CCDC155	4	0.99155	0.99156	0.999533	19189	0	-0.86136
SPINK14	4	0.52166	0.60918	0.999533	11696	1	-0.22657
C2orf72	4	0.99148	0.9915	0.999533	19188	0	-0.92667
PIWIL1	4	0.94238	0.94266	0.999533	18138	0	-0.82056
MARK3	4	0.67276	0.69737	0.999533	13400	1	-1022
EFNA2	4	0.75232	0.75728	0.999533	14479	1	-0.89636
ZNF443	4	0.99144	0.99146	0.999533	19187	0	-0.56582
KDM2A	4	0.2476	0.38226	0.999533	7308	1	-0.94199
PKD1L3	4	0.9273	0.92756	0.999533	17845	0	-10015
AGPS	4	0.835	0.83528	0.999533	16020	0	-0.90277
SLC35D3	4	0.99139	0.9914	0.999533	19186	0	-0.98529
VEGFB	4	0.84115	0.84151	0.999533	16138	0	-0.84974
SETD5	4	0.99136	0.99138	0.999533	19185	0	-0.69561
NUDT19	4	0.99135	0.99136	0.999533	19184	0	-0.62395
PKP3	4	0.99011	0.99012	0.999533	19151	0	-0.92766
ZNF138	4	0.68044	0.70263	0.999533	13495	1	-10053
PRKDC	4	0.9913	0.99132	0.999533	19183	0	-11753
ZNF48	4	0.8298	0.83011	0.999533	15907	0	-0.89587
THNSL2	4	0.56156	0.63014	0.999533	12106	1	-1.09
RPS10	4	0.99125	0.99126	0.999533	19182	0	-45988
COL7A1	4	0.84756	0.84791	0.999533	16273	0	-10698
IGSF8	4	0.9912	0.99121	0.999533	19181	0	-0.6676
CHMP5	4	0.99119	0.9912	0.999533	19180	0	-0.96845
EIF4B	4	0.99117	0.99119	0.999533	19179	0	-11751
TMPRSS15	4	0.10368	0.22111	0.993424	4307	2	-0.046358
LPCAT4	4	0.93836	0.93859	0.999533	18063	0	-0.66904
WDR35	4	0.99114	0.99115	0.999533	19178	0	-10682
SEPSECS	4	0.73291	0.74155	0.999533	14176	1	-1835
TREML2	4	0.53686	0.61693	0.999533	11855	1	-0.89314
HBEGF	4	0.73819	0.74579	0.999533	14255	1	-0.83138
UBE2D2	4	0.2083	0.34038	0.999533	6502	1	-0.99765
GOLGA8N	4	0.22034	0.35326	0.999533	6747	2	-0.38148
KRT34	4	0.99107	0.99108	0.999533	19177	0	-11661
C9orf84	4	0.98385	0.98398	0.999533	19022	0	-10162
TM4SF1	4	0.95597	0.95618	0.999533	18424	0	-1248
SCGB1A1	4	0.96587	0.96608	0.999533	18617	0	-0.64938
PNLDC1	4	0.29362	0.43123	0.999533	8246	1	-0.41906
ADD1	4	0.99092	0.99095	0.999533	19176	0	-1366
37865	4	0.60388	0.65409	0.999533	12568	1	0.15007
GAGE10	4	0.99089	0.99092	0.999533	19175	0	-0.53072
CA8	4	0.79699	0.79744	0.999533	15268	1	-0.67688
PMEL	4	0.32458	0.46426	0.999533	8856	1	-0.92325
MERTK	4	0.29941	0.43745	0.999533	8372	2	-0.081769
CHRNB1	4	0.99081	0.99084	0.999533	19174	0	-0.9216
PCDHB9	4	0.7713	0.77341	0.999533	14795	1	-0.93608
CXXC1	4	0.9908	0.99082	0.999533	19173	0	-10754
FAM171B	4	0.9908	0.99082	0.999533	19172	0	-0.55059
PDHA1	4	0.99077	0.99079	0.999533	19171	0	-0.8508
DHRSX	4	0.99075	0.99077	0.999533	19170	0	-13906
JUND	4	0.10145	0.2171	0.992754	4232	1	-0.66311
Control_217	4	0.98184	0.98204	0.999533	18969	0	-0.9301
MS4A4A	4	0.8017	0.8021	0.999533	15346	1	-15644
ITGBL1	4	0.99072	0.99075	0.999533	19169	0	-0.74027
ADCK4	4	0.032666	0.084682	0.987134	1619	3	0.57468
CERK	4	0.99067	0.9907	0.999533	19168	0	-0.88089
YY1AP1	4	0.26264	0.39814	0.999533	7599	2	-0.64047
KIAA1549L	4	0.26752	0.40327	0.999533	7706	2	-0.79111
TTLL12	4	0.99062	0.99064	0.999533	19167	0	-0.83118
ARMC7	4	0.99062	0.99064	0.999533	19166	0	-2794
ZNF827	4	0.12222	0.24809	0.995611	4813	2	0.34783
FMO4	4	0.87035	0.87063	0.999533	16703	0	-13952
TMEM86A	4	0.12831	0.25467	0.996035	4950	1	-10199
MYBPC1	4	0.99058	0.9906	0.999533	19165	0	-0.66631
CAP2	4	0.71921	0.73093	0.999533	13993	1	-0.84404
SLC35E3	4	0.74844	0.75407	0.999533	14427	1	-0.67877
Control_97	4	0.98619	0.98626	0.999533	19074	0	-0.76823
HCFC1	4	0.99053	0.99056	0.999533	19164	0	-15473
TUBB	4	0.76603	0.76878	0.999533	14712	1	-15468
ITPRIP	4	0.91833	0.91863	0.999533	17679	0	-0.89177
CAV1	4	0.51662	0.60659	0.999533	11648	1	-0.3203
MAU2	4	0.9905	0.99053	0.999533	19163	0	-1368
NABP2	4	0.99049	0.99053	0.999533	19162	0	-0.83383
A2M	4	0.97665	0.97687	0.999533	18864	0	-0.82544
SBK1	4	0.97324	0.97344	0.999533	18772	0	-13033
RAD1	4	0.82375	0.82412	0.999533	15782	0	-0.78629
KCNC4	4	0.80783	0.80821	0.999533	15469	0	-0.99581
DRAM1	4	0.1823	0.31253	0.999533	5991	2	0.2371
PIWIL3	4	0.78088	0.78218	0.999533	14962	1	-0.65263
RTCB	4	0.18085	0.31095	0.999533	5959	2	-0.97428
CHPT1	4	0.99036	0.99039	0.999533	19159	0	-12894
NANOS2	4	0.0060066	0.020724	0.895763	448	3	0.65011
ADAM33	4	0.85588	0.85629	0.999533	16441	0	-15627
CPSF7	4	0.67475	0.69871	0.999533	13421	1	-17784
RPL19	4	0.99031	0.99033	0.999533	19158	0	-18407
SEL1L2	4	0.41594	0.55918	0.999533	10712	1	-0.27148
VPS33B	4	0.42117	0.56145	0.999533	10763	1	-0.76654
GTPBP6	4	0.84435	0.84466	0.999533	16210	0	-11591
NGDN	4	0.16107	0.28981	0.999533	5578	2	0.3045
SALL2	4	0.99023	0.99026	0.999533	19157	0	-13388
RAC1	4	0.99022	0.99025	0.999533	19156	0	-11772
ASIC4	4	0.6516	0.68345	0.999533	13145	1	-0.55506
H2AFJ	4	0.60073	0.65224	0.999533	12535	1	-0.045085
AP3S1	4	0.99019	0.99021	0.999533	19154	0	-0.58348
RABEP2	4	0.97643	0.97664	0.999533	18855	0	-13478
ZNF395	4	0.99015	0.99016	0.999533	19153	0	-0.79438
OR10W1	4	0.4577	0.57804	0.999533	11093	1	-11344
ZNF230	4	0.26301	0.39855	0.999533	7610	1	-0.63645
H2AFB3	4	0.99012	0.99013	0.999533	19152	0	-16536
TMEM120B	4	0.12584	0.25197	0.995611	4896	1	-0.40116
USP17L28	4	0.99009	0.9901	0.999533	19150	0	-10807
ALK	4	0.4774	0.5874	0.999533	11288	1	-13734
DGKH	4	0.074062	0.16653	0.987134	3224	1	-0.97863
ALDH2	4	0.031204	0.081665	0.987134	1561	2	0.4548
PROL1	4	0.79569	0.79614	0.999533	15246	1	-0.87566
FAM136A	4	0.99003	0.99004	0.999533	19149	0	-15248
AKR1C2	4	0.36794	0.51021	0.999533	9786	1	-0.24471
ALG11	4	0.81447	0.81479	0.999533	15615	0	-25935
MCCC2	4	0.96539	0.9656	0.999533	18600	0	-14038
FOXR2	4	0.88468	0.88491	0.999533	16980	0	-10295
KCND3	4	0.89324	0.89341	0.999533	17151	0	-0.45555
XPC	4	0.98993	0.98993	0.999533	19148	0	-0.55345
SYT1	4	0.97576	0.97597	0.999533	18841	0	-0.92943
Control_236	4	0.98988	0.98988	0.999533	19147	0	-0.84102
PRAMEF5	4	0.25707	0.39219	0.999533	7490	1	-24913
HAUS8	4	0.98983	0.98982	0.999533	19146	0	-20417
RND1	4	0.72678	0.73683	0.999533	14092	1	-13403
CAND1	4	0.98982	0.98981	0.999533	19145	0	-36706
ZNF195	4	0.21504	0.34757	0.999533	6642	1	-0.68712
MFRP	4	0.55541	0.62679	0.999533	12032	1	-0.13597
TAS2R43	4	0.87933	0.87963	0.999533	16862	0	-0.63486
CD7	4	0.98975	0.98975	0.999533	19144	0	-0.53548
SORCS2	4	0.98974	0.98974	0.999533	19143	0	-0.83443
TRPM5	4	0.27538	0.41172	0.999533	7867	2	-0.04648
TYW1B	4	0.83492	0.83522	0.999533	16016	0	-11397
ZNF3	4	0.98966	0.98968	0.999533	19142	0	-0.95261
SNPH	4	0.70394	0.71953	0.999533	13806	1	-13403
CXCL9	4	0.30131	0.43944	0.999533	8411	1	-2346
CDC20	4	0.98964	0.98967	0.999533	19141	0	-16512
AP2S1	4	0.98963	0.98965	0.999533	19140	0	-1693
ORM2	4	0.32945	0.46949	0.999533	8958	2	0.026198
SMC5	4	0.19486	0.32599	0.999533	6242	1	-13158
DAXX	4	0.98962	0.98963	0.999533	19139	0	-0.79615
CDY1B	4	0.98588	0.98596	0.999533	19069	0	-10776
UBE2F	4	0.98961	0.98963	0.999533	19138	0	-15795
TMSB15B	4	0.9896	0.98962	0.999533	19137	0	-0.83769
SNX4	4	0.37802	0.52098	0.999533	9982	2	0.02498
ERICH2	4	0.21569	0.34829	0.999533	6658	1	-0.93013
FBXO22	4	0.25546	0.3905	0.999533	7456	1	-0.1369
PLCB3	4	0.98952	0.98953	0.999533	19135	0	-0.69347
ZNF2	4	0.42775	0.56439	0.999533	10815	1	-0.72552
ZMYM3	4	0.9895	0.98951	0.999533	19134	0	-0.81025
PRPF3	4	0.67086	0.6961	0.999533	13374	1	-0.68133
SLC35D1	4	0.88092	0.8812	0.999533	16891	0	-15641
SETSIP	4	0.33878	0.47935	0.999533	9153	1	-0.81705
SARS	4	0.98947	0.98948	0.999533	19133	0	-27537
YBX3	4	0.89125	0.89143	0.999533	17114	0	-10105
CXADR	4	0.97407	0.97427	0.999533	18801	0	-0.95169
CT47A5	4	0.95402	0.95426	0.999533	18379	0	-12299
PCNXL4	4	0.97563	0.97584	0.999533	18839	0	-0.94677
GCN1L1	4	0.98937	0.98938	0.999533	19132	0	-14343
HRK	4	0.63495	0.67291	0.999533	12921	1	-15111
ACBD7	4	0.98936	0.98937	0.999533	19131	0	-0.6616
PDLIM2	4	0.98936	0.98936	0.999533	19130	0	-0.96826
PAIP2	4	0.98934	0.98935	0.999533	19129	0	-0.80394
GPR33	4	0.77643	0.77805	0.999533	14882	1	-0.70333
FAM175B	4	0.38877	0.53248	0.999533	10189	1	-0.23663
LCN9	4	0.70121	0.71753	0.999533	13769	1	-13888
ANGEL2	4	0.062748	0.14468	0.987134	2811	1	0.17312
SET	4	0.98927	0.98926	0.999533	19128	0	-0.67061
SLC5A9	4	0.072874	0.16425	0.987134	3179	3	0.29038
VAMP2	4	0.23073	0.36436	0.999533	6969	2	-0.056084
FAM83G	4	0.98916	0.98916	0.999533	19127	0	-0.64958
ALPK2	4	0.31298	0.45193	0.999533	8632	2	-0.98913
PRKCI	4	0.92243	0.92274	0.999533	17752	0	-0.66434
SIRT7	4	0.31716	0.45632	0.999533	8714	2	0.30226
HAVCR1	4	0.95274	0.95299	0.999533	18346	0	-0.98765
XPO1	4	0.98908	0.98907	0.999533	19126	0	-44344
KRTAP19-1	4	0.918	0.9183	0.999533	17669	0	-0.75696
FBLN1	4	0.22054	0.35347	0.999533	6752	1	-0.10535
PPP2R3A	4	0.39027	0.53407	0.999533	10218	1	-0.83795
ZNF735	4	0.011178	0.037169	0.966635	734	2	0.42423
KRTAP1-3	4	0.40341	0.54823	0.999533	10505	2	-0.81701
CDHR1	4	0.68412	0.70519	0.999533	13540	1	-0.75432
MUC22	4	0.017472	0.052393	0.979013	1030	2	-0.28211
C4orf33	4	0.89351	0.89368	0.999533	17155	0	-0.45737
ARSJ	4	0.081257	0.18003	0.987134	3506	1	-0.63414
MRPL15	4	0.35216	0.49358	0.999533	9439	1	-0.47627
SOST	4	0.98886	0.98886	0.999533	19124	0	-0.9175
PGC	4	0.98884	0.98884	0.999533	19123	0	-0.60912
AVPR1A	4	0.72659	0.73666	0.999533	14090	1	-0.78862
C12orf29	4	0.25239	0.38729	0.999533	7390	1	-0.83128
DOCK8	4	0.53519	0.61606	0.999533	11830	1	-0.81639
P3H2	4	0.64254	0.67761	0.999533	13034	1	-0.40702
LY6E	4	0.22388	0.35707	0.999533	6817	1	-10547
CENPW	4	0.98876	0.98875	0.999533	19121	0	-0.968
MRPS17	4	0.82571	0.82607	0.999533	15826	0	-15358
ALAD	4	0.52738	0.61209	0.999533	11754	1	-0.51289
ZC3HAV1	4	0.98869	0.98868	0.999533	19120	0	-10581
C19orf66	4	0.44433	0.57182	0.999533	10968	1	-16719
ALG14	4	0.37824	0.52123	0.999533	9987	1	-0.68792
MRPL49	4	0.74442	0.75082	0.999533	14360	1	-0.6956
AHSA2	4	0.98857	0.98857	0.999533	19118	0	-0.56256
MTOR	4	0.81987	0.82024	0.999533	15702	0	-11598
IL17RB	4	0.57297	0.63648	0.999533	12228	1	-0.43739
HLF	4	0.98855	0.98855	0.999533	19117	0	-0.6387
CREB3L4	4	0.94841	0.94864	0.999533	18266	0	-0.98959
GOLGA6L9	4	0.25359	0.38858	0.999533	7416	1	-29744
ZFPL1	4	0.56062	0.62962	0.999533	12095	1	-0.48403
RPA2	4	0.93341	0.9337	0.999533	17969	0	-14613
MRPL21	4	0.1183	0.24388	0.995611	4728	1	-12699
HTRA3	4	0.98847	0.98847	0.999533	19116	0	-0.47384
PHF8	4	0.96321	0.96341	0.999533	18556	0	-11534
AREG	4	0.9269	0.92718	0.999533	17838	0	-0.67295
PIKFYVE	4	0.48297	0.59001	0.999533	11326	1	-0.97217
CDC73	4	0.97686	0.97705	0.999533	18868	0	-16947
DIS3L2	4	0.98845	0.98846	0.999533	19115	0	-0.82828
TBC1D22A	4	0.8849	0.88512	0.999533	16986	0	-0.97739
ZNHIT1	4	0.31272	0.45164	0.999533	8627	1	-12216
LRIG1	4	0.98843	0.98844	0.999533	19114	0	-32894
ASPDH	4	0.90469	0.90491	0.999533	17402	0	-0.41792
LRRK2	4	0.9884	0.98841	0.999533	19113	0	-0.8029
ACRC	4	0.20543	0.3373	0.999533	6452	1	-1068
HOXB13	4	0.98837	0.98838	0.999533	19112	0	-0.60783
CLK4	4	0.98836	0.98838	0.999533	19111	0	-0.78439
RTN4R	4	0.98836	0.98837	0.999533	19110	0	-10038
NUDT10	4	0.98834	0.98836	0.999533	19109	0	-0.72833
OPN1MW	4	0.13333	0.26006	0.99701	5050	1	-14857
SLFN14	4	0.32546	0.46518	0.999533	8881	1	-0.82995
MAOB	4	0.20367	0.33542	0.999533	6417	2	0.2598
TLCD1	4	0.32529	0.46498	0.999533	8874	2	-0.95719
NOTCH1	4	0.88421	0.88448	0.999533	16971	0	-0.82816
C4orf47	4	0.026715	0.072208	0.987134	1378	3	0.69346
FAM78B	4	0.27809	0.41466	0.999533	7915	1	-0.85898
41883	4	0.84541	0.84569	0.999533	16236	0	-0.15581
KCNA1	4	0.71121	0.7249	0.999533	13890	1	-0.73347
KIAA1804	4	0.8823	0.88259	0.999533	16920	0	-0.86644
CLDN20	4	0.12336	0.24935	0.995611	4843	2	-0.24564
GTF2H5	4	0.58293	0.642	0.999533	12342	1	-10697
GSAP	4	0.96043	0.96066	0.999533	18507	0	-0.87204
NEK4	4	0.98806	0.98807	0.999533	19108	0	-0.6329
GAS6	4	0.27724	0.41374	0.999533	7899	2	0.050971
ATXN7L3B	4	0.75065	0.7559	0.999533	14458	1	-0.95875
CCS	4	0.98802	0.98803	0.999533	19107	0	-0.96761
SPINK8	4	0.5971	0.65014	0.999533	12492	1	-0.72855
C1orf189	4	0.73235	0.74113	0.999533	14168	1	-0.62869
LRAT	4	0.98794	0.98796	0.999533	19106	0	-0.77827
PAOX	4	0.98792	0.98794	0.999533	19105	0	-0.87104
NUDT6	4	0.40127	0.54597	0.999533	10461	2	-0.9095
KIAA0895L	4	0.24405	0.37845	0.999533	7232	1	-0.48862
KEL	4	0.95599	0.9562	0.999533	18426	0	-0.81892
KANSL2	4	0.96856	0.96876	0.999533	18660	0	-14601
B3GALT2	4	0.98781	0.98783	0.999533	19104	0	-0.33939
MAP4K4	4	0.88908	0.88927	0.999533	17066	0	-0.20068
GOLGA8J	4	0.37509	0.5179	0.999533	9921	1	-17581
TMEM254	4	0.98775	0.98776	0.999533	19103	0	-0.65444
RNF207	4	0.98773	0.98774	0.999533	19102	0	-0.56959
CTSO	4	0.12402	0.25003	0.995611	4853	2	0.20447
ERO1LB	4	0.96434	0.96458	0.999533	18576	0	-1175
RGMA	4	0.13972	0.26694	0.998885	5170	1	-0.91693
SLC17A2	4	0.84962	0.84997	0.999533	16313	0	-0.78713
HDHD2	4	0.64703	0.68047	0.999533	13094	1	-0.11788
KRTAP3-2	4	0.98762	0.98764	0.999533	19100	0	-0.74835
STRA8	4	0.97845	0.97866	0.999533	18904	0	-14021
HTR7	4	0.69518	0.71317	0.999533	13689	1	-0.90932
ABCB5	4	0.58067	0.64077	0.999533	12322	1	-0.28688
IGSF22	4	0.98751	0.98751	0.999533	19099	0	-0.78944
HGH1	4	0.81516	0.81548	0.999533	15627	0	-0.94209
KIF20B	4	0.77253	0.77449	0.999533	14815	1	-0.24235
NPR2	4	0.98747	0.98748	0.999533	19098	0	-0.57094
MBNL3	4	0.98746	0.98747	0.999533	19097	0	-0.9829
LGR5	4	0.68651	0.7069	0.999533	13571	1	-0.76211
PCDH11Y	4	0.06137	0.14202	0.987134	2760	1	-0.93798
Control_199	4	0.9871	0.98711	0.999533	19088	0	-0.71135
CDK2	4	0.27458	0.41089	0.999533	7847	2	-0.21137
C19orf18	4	0.98174	0.98194	0.999533	18964	0	-0.93129
SARDH	4	0.2798	0.41648	0.999533	7954	2	0.16697
UQCRQ	4	0.98735	0.98737	0.999533	19096	0	-0.82518
C3orf38	4	0.98733	0.98734	0.999533	19095	0	-0.95505
SECISBP2L	4	0.96491	0.96512	0.999533	18591	0	-0.79456
LRTM2	4	0.24756	0.3822	0.999533	7307	2	0.35293
C11orf30	4	0.98732	0.98733	0.999533	19094	0	-0.75936
WDR66	4	0.88517	0.88538	0.999533	16994	0	-0.95608
COX5A	4	0.98726	0.98727	0.999533	19093	0	-1401
CRYZ	4	0.95451	0.95475	0.999533	18389	0	-0.7845
PRSS16	4	0.98723	0.98724	0.999533	19092	0	-0.5664
CFAP70	4	0.97803	0.97822	0.999533	18894	0	-0.75
BFSP2	4	0.41238	0.55761	0.999533	10682	1	-0.40399
TBP	4	0.98718	0.98719	0.999533	19091	0	-20517
FAM178B	4	0.88324	0.88353	0.999533	16942	0	-0.84095
FOXP3	4	0.8471	0.84744	0.999533	16263	0	-0.60498
NPIPB9	4	0.98713	0.98714	0.999533	19090	0	-1.41
TRIP11	4	0.17134	0.3008	0.999533	5774	1	0.042249
OR10V1	4	0.9871	0.98712	0.999533	19089	0	-0.82329
PAGE2B	4	0.89936	0.89959	0.999533	17292	0	-0.6999
C2CD2L	4	0.16284	0.2917	0.999533	5606	2	0.1054
OR2G6	4	0.25622	0.39129	0.999533	7472	2	0.083971
MUC7	4	0.35683	0.49852	0.999533	9544	2	-0.53721
ATP6V0D1	4	0.59106	0.64664	0.999533	12432	1	-0.086771
ATP8B3	4	0.98691	0.98693	0.999533	19086	0	-0.7105
MIR205HG	4	0.98686	0.98688	0.999533	19085	0	-0.69884
SLC35F6	4	0.10823	0.22946	0.995611	4445	2	-0.59312
C6orf89	4	0.28915	0.4265	0.999533	8162	1	-0.66106
RBM28	4	0.98682	0.98684	0.999533	19084	0	-0.54495
MPZ	4	0.77891	0.78032	0.999533	14930	1	-0.83186
ANGPT4	4	0.98679	0.98682	0.999533	19083	0	-0.66258
Control_10	4	0.89763	0.89783	0.999533	17248	0	-0.93119
WRN	4	0.041161	0.10202	0.987134	1942	2	0.29656
GNAI1	4	0.98676	0.98679	0.999533	19082	0	-0.57779
GAGE12I	4	0.98675	0.98678	0.999533	19081	0	-14903
TMEM255A	4	0.43711	0.56853	0.999533	10905	1	-12808
AARSD1	4	0.93404	0.93433	0.999533	17981	0	-0.6597
PPIL3	4	0.49736	0.59695	0.999533	11460	1	-0.48341
KMT2C	4	0.98668	0.98672	0.999533	19080	0	-0.89222
DUSP4	4	0.94143	0.94167	0.999533	18120	0	-0.7731
KCNN3	4	0.11255	0.23712	0.995611	4602	1	-14354
LRP5	4	0.98657	0.98661	0.999533	19079	0	-0.95708
Control_78	4	0.42581	0.56354	0.999533	10798	1	-0.59862
TAAR5	4	0.32815	0.46805	0.999533	8935	1	-0.74177
KBTBD12	4	0.87618	0.8765	0.999533	16796	0	-0.83624
CDX1	4	0.67889	0.70157	0.999533	13469	1	-0.63042
USP37	4	0.89294	0.89313	0.999533	17147	0	-31468
CPA5	4	0.39151	0.53538	0.999533	10251	2	-0.29008
XCL1	4	0.89744	0.89766	0.999533	17246	0	-11015
KDSR	4	0.98646	0.98651	0.999533	19077	0	-15013
ESYT1	4	0.39301	0.53702	0.999533	10283	2	-0.33656
FGF10	4	0.092379	0.20054	0.99125	3912	2	-0.42843
TRIP10	4	0.96771	0.96791	0.999533	18642	0	-0.41761
GCFC2	4	0.98631	0.98638	0.999533	19076	0	-0.69628
MPV17	4	0.48853	0.59267	0.999533	11379	1	-14971
ZBTB1	4	0.51519	0.60587	0.999533	11630	1	-0.14241
KCNJ11	4	0.74615	0.75219	0.999533	14385	1	-12856
MYO16	4	0.98624	0.9863	0.999533	19075	0	-0.83353
PCSK5	4	0.019611	0.057058	0.987134	1110	2	0.0077313
NR2F2	4	0.21702	0.34973	0.999533	6683	1	-0.80273
Control_227	4	0.13747	0.26454	0.998794	5124	2	0.25419
UBOX5	4	0.26543	0.40114	0.999533	7663	2	-0.56202
P2RX5	4	0.37694	0.51984	0.999533	9963	1	-0.27935
KRTAP21-2	4	0.81623	0.81657	0.999533	15644	0	-12756
SERPINB9	4	0.98607	0.98614	0.999533	19073	0	-0.65597
MADCAM1	4	0.98605	0.98612	0.999533	19072	0	-11866
SFXN2	4	0.89105	0.89123	0.999533	17107	0	-12461
PYDC1	4	0.33094	0.47106	0.999533	8987	1	-1284
OPN1LW	4	0.3391	0.47968	0.999533	9162	2	-0.1288
SLC35B1	4	0.98597	0.98604	0.999533	19071	0	-19007
COX19	4	0.40695	0.55206	0.999533	10578	1	-0.53717
MAP3K14	4	0.92655	0.9268	0.999533	17830	0	-14802
RMND5A	4	0.98589	0.98597	0.999533	19070	0	-0.90622
ZNF439	4	0.98587	0.98595	0.999533	19068	0	-0.67296
CCDC27	4	0.98587	0.98594	0.999533	19067	0	-0.86487
CRYBA1	4	0.98586	0.98594	0.999533	19066	0	-10061
TLE4	4	0.68916	0.70877	0.999533	13610	1	-11477
DHRS1	4	0.29705	0.43492	0.999533	8312	2	-0.25302
LGALS9B	4	0.98584	0.98592	0.999533	19065	0	-0.81257
FBXL13	4	0.98583	0.98591	0.999533	19063	0	-0.51083
FYTTD1	4	0.98582	0.98591	0.999533	19062	0	-0.50641
TTC3	4	0.59162	0.647	0.999533	12437	1	-0.42056
LOC100130370	4	0.87164	0.87194	0.999533	16721	0	-0.86211
C3orf22	4	0.98578	0.98587	0.999533	19061	0	-0.50304
CCDC23	4	0.98577	0.98586	0.999533	19060	0	-0.57903
NUP210L	4	0.98575	0.98584	0.999533	19059	0	-0.77535
SNW1	4	0.50055	0.59856	0.999533	11491	1	-17138
CTNNB1	4	0.97384	0.97403	0.999533	18792	0	-10012
ADGRG4	4	0.98569	0.98579	0.999533	19058	0	-0.71201
IKBKG	4	0.16889	0.29815	0.999533	5733	2	0.086174
PNPLA3	4	0.98569	0.98578	0.999533	19057	0	-0.78337
MSH6	4	0.95093	0.95118	0.999533	18314	0	-0.93612
NME5	4	0.88816	0.88836	0.999533	17055	0	-0.44623
VLDLR	4	0.4304	0.5656	0.999533	10841	1	-0.9302
UBD	4	0.76581	0.76859	0.999533	14708	1	-0.65806
SLC16A12	4	0.34373	0.48459	0.999533	9262	1	-0.58522
ZNF514	4	0.98554	0.98563	0.999533	19056	0	-16459
C16orf46	4	0.29402	0.43165	0.999533	8254	2	-13776
RPS23	4	0.87225	0.87255	0.999533	16729	0	-37788
NGB	4	0.90986	0.91018	0.999533	17514	0	-0.63321
ERP44	4	0.85967	0.86002	0.999533	16512	0	-11191
C7orf60	4	0.98538	0.98548	0.999533	19055	0	-0.59856
ODAM	4	0.82012	0.82047	0.999533	15709	0	-0.75533
EBP	4	0.7994	0.79984	0.999533	15311	1	-0.32534
BCO2	4	0.19647	0.32769	0.999533	6279	2	-0.341
ZNF641	4	0.96878	0.96897	0.999533	18669	0	-0.91896
SLC39A7	4	0.97619	0.97642	0.999533	18849	0	-1733
MGC57346-CRHR1	4	0.97325	0.97345	0.999533	18773	0	-0.97443
NAA40	4	0.98521	0.98533	0.999533	19053	0	-0.45839
OSM	4	0.26841	0.40425	0.999533	7726	1	-0.85838
C17orf51	4	0.31861	0.45787	0.999533	8747	2	0.13201
TFDP2	4	0.98516	0.98529	0.999533	19052	0	-0.68923
CLPB	4	0.7437	0.75023	0.999533	14348	1	-13518
PBLD	4	0.98514	0.98527	0.999533	19051	0	-14531
WNT5B	4	0.12523	0.25132	0.995611	4884	1	0.032431
ZNF396	4	0.98512	0.98524	0.999533	19050	0	-0.7333
PAXIP1	4	0.51666	0.60661	0.999533	11650	1	-0.45037
JPH4	4	0.91245	0.91276	0.999533	17562	0	-10699
MTIF3	4	0.98507	0.98519	0.999533	19049	0	-0.50067
FARP1	4	0.15238	0.28054	0.999533	5411	1	-10546
OR13C9	4	0.56579	0.63249	0.999533	12152	1	-0.55855
ARFGAP1	4	0.98505	0.98517	0.999533	19048	0	-0.64575
RNF222	4	0.55338	0.6257	0.999533	12013	1	-0.95021
DNAL4	4	0.98284	0.98299	0.999533	18995	0	-0.94991
GPR182	4	0.82956	0.82986	0.999533	15904	0	-0.73429
BIRC5	4	0.98501	0.98513	0.999533	19047	0	-37428
IFIT1B	4	0.96312	0.96332	0.999533	18552	0	-0.79559
TMEM101	4	0.98498	0.9851	0.999533	19046	0	-0.56281
GNAS	4	0.36376	0.50589	0.999533	9688	1	-0.69593
PCDHA12	4	0.83816	0.83846	0.999533	16078	0	-0.14495
DUSP11	4	0.71245	0.72579	0.999533	13901	1	-0.97543
DDB1	4	0.98497	0.98509	0.999533	19045	0	-10216
SPSB4	4	0.23728	0.37132	0.999533	7093	1	-0.80806
SCO2	4	0.96859	0.96879	0.999533	18662	0	-13082
CAPN3	4	0.98488	0.985	0.999533	19044	0	-0.88566
KCNK12	4	0.98486	0.98499	0.999533	19043	0	-0.84031
CD9	4	0.97432	0.97451	0.999533	18807	0	-0.64236
NFU1	4	0.9719	0.97209	0.999533	18746	0	-1528
PIGV	4	0.79805	0.7985	0.999533	15286	1	-0.50435
UNC13A	4	0.72286	0.73377	0.999533	14038	1	-0.80152
C4orf45	4	0.58386	0.64258	0.999533	12354	1	-0.75299
NHS	4	0.85146	0.85183	0.999533	16349	0	-0.12578
GNA15	4	0.98474	0.98487	0.999533	19042	0	-0.52274
RUNX1	4	0.96761	0.96782	0.999533	18639	0	-0.38041
GAL3ST2	4	0.9847	0.98482	0.999533	19041	0	-13417
ETHE1	4	0.23157	0.36525	0.999533	6981	2	-0.081161
PRDX3	4	0.98467	0.98479	0.999533	19040	0	-0.41802
RGS7BP	4	0.98464	0.98477	0.999533	19039	0	-0.67102
GPR45	4	0.82256	0.8229	0.999533	15752	0	-13585
ITPR2	4	0.98463	0.98476	0.999533	19038	0	-0.73832
ZMPSTE24	4	0.97671	0.97692	0.999533	18865	0	-11635
AKAP11	4	0.074306	0.16699	0.987134	3236	2	-0.67806
OR10Q1	4	0.98462	0.98474	0.999533	19037	0	-0.42103
IMPG2	4	0.78974	0.79043	0.999533	15124	1	-0.5234
AMMECR1L	4	0.91606	0.91639	0.999533	17638	0	-0.64659
SYDE1	4	0.24191	0.3762	0.999533	7196	2	-0.13573
SERPINI2	4	0.75875	0.76264	0.999533	14579	1	-0.46568
CASQ1	4	0.98334	0.98348	0.999533	19010	0	-12476
SND1	4	0.98453	0.98466	0.999533	19036	0	-0.55388
UROS	4	0.4888	0.59281	0.999533	11381	1	-11075
IBTK	4	0.62935	0.66942	0.999533	12863	1	-23049
SCIMP	4	0.29043	0.42785	0.999533	8179	1	-0.79363
IL2RB	4	0.12596	0.25211	0.995611	4898	2	-0.77371
FAM83B	4	0.9636	0.96381	0.999533	18566	0	-0.77972
MYOZ2	4	0.089999	0.19619	0.98945	3837	1	-0.083923
BMPR1B	4	0.98445	0.98458	0.999533	19035	0	-0.89142
IL12RB2	4	0.98444	0.98458	0.999533	19034	0	-0.68429
C10orf126	4	0.8837	0.88397	0.999533	16953	0	-0.7988
SGCA	4	0.3254	0.46511	0.999533	8879	2	0.28965
BAIAP2	4	0.89011	0.89031	0.999533	17088	0	-1085
IL6	4	0.98438	0.98451	0.999533	19033	0	-0.71225
ZCCHC11	4	0.71919	0.73091	0.999533	13992	1	-0.8437
GRM1	4	0.97921	0.97941	0.999533	18918	0	-0.94836
FIBIN	4	0.075086	0.16846	0.987134	3275	1	0.049177
LPPR1	4	0.98436	0.9845	0.999533	19032	0	-0.58444
BAG4	4	0.98435	0.98449	0.999533	19030	0	-0.72491
MIPOL1	4	0.3445	0.48545	0.999533	9280	2	-0.4998
CH17-360D5.1	4	0.98428	0.98441	0.999533	19029	0	-13413
FGF8	4	0.98425	0.98438	0.999533	19028	0	-13463
LILRA5	4	0.98424	0.98437	0.999533	19027	0	-0.71604
MRPS10	4	0.2995	0.43754	0.999533	8374	2	-0.12928
ZNF746	4	0.95585	0.95606	0.999533	18422	0	-10569
TTK	4	0.51551	0.60602	0.999533	11631	1	0.1291
TAOK3	4	0.31577	0.45484	0.999533	8696	2	-0.28518
ENPP7	4	0.58869	0.64532	0.999533	12404	1	-18422
RALGPS1	4	0.21874	0.35153	0.999533	6721	1	-0.96962
PITPNB	4	0.71413	0.72704	0.999533	13925	1	-0.89808
C15orf38-AP3S2	4	0.87199	0.87228	0.999533	16727	0	-0.73537
SNRPF	4	0.98409	0.98424	0.999533	19026	0	-31584
UHRF1BP1	4	0.53737	0.61719	0.999533	11861	1	-0.59951
CTTNBP2	4	0.88988	0.89008	0.999533	17084	0	-12505
PACSIN1	4	0.53766	0.61734	0.999533	11864	1	-10809
PHLDA2	4	0.68801	0.70793	0.999533	13595	1	-0.30045
ASCL2	4	0.6951	0.7131	0.999533	13686	1	-0.88325
CORO1C	4	0.98397	0.9841	0.999533	19025	0	-0.75812
CDC40	4	0.98396	0.9841	0.999533	19024	0	-0.6861
COL6A1	4	0.8731	0.8734	0.999533	16744	0	-0.76475
MTNR1B	4	0.98395	0.98409	0.999533	19023	0	-0.89155
NFS1	4	0.96482	0.96504	0.999533	18589	0	-11643
POLDIP3	4	0.37943	0.5225	0.999533	10011	1	-0.77281
QPRT	4	0.3472	0.48836	0.999533	9334	1	-0.3489
RFPL2	4	0.73174	0.74067	0.999533	14162	1	-0.58229
PLEK	4	0.94945	0.94966	0.999533	18287	0	-0.5592
HLA-DQA1	4	0.98379	0.98392	0.999533	19021	0	-24859
RORB	4	0.34983	0.49113	0.999533	9385	1	-0.40704
COG1	4	0.12494	0.25103	0.995611	4878	2	0.27058
SPIB	4	0.4223	0.56197	0.999533	10771	1	-10856
TRIM42	4	0.98372	0.98384	0.999533	19020	0	-0.70658
AS3MT	4	0.98371	0.98383	0.999533	19019	0	-0.56099
HERC1	4	0.39044	0.53424	0.999533	10226	1	-0.82648
TMEM50B	4	0.037286	0.094133	0.987134	1803	2	0.26149
RNF114	4	0.9224	0.9227	0.999533	17750	0	-10927
C6orf10	4	0.98367	0.98379	0.999533	19018	0	-0.64722
CFAP99	4	0.83738	0.83771	0.999533	16059	0	-0.74308
MTIF2	4	0.83977	0.84011	0.999533	16112	0	-0.14216
ACP2	4	0.28615	0.42324	0.999533	8098	2	-0.79886
STATH	4	0.98364	0.98376	0.999533	19017	0	-2337
TBRG1	4	0.98362	0.98374	0.999533	19016	0	-0.65107
ZCCHC7	4	0.28824	0.42551	0.999533	8143	2	-0.67942
SPO11	4	0.98361	0.98373	0.999533	19015	0	-0.65835
COQ10B	4	0.22152	0.35454	0.999533	6770	1	-0.63413
VWA7	4	0.97585	0.97608	0.999533	18844	0	-0.89949
TMEM107	4	0.0030182	0.010723	0.848283	238	2	0.11865
WDR45	4	0.97839	0.97859	0.999533	18902	0	-0.92346
SLC9A7	4	0.9835	0.98365	0.999533	19014	0	-0.47022
PANK3	4	0.32891	0.46889	0.999533	8949	1	-0.45934
CFAP97	4	0.9835	0.98364	0.999533	19013	0	-0.907
BRD8	4	0.30505	0.44345	0.999533	8478	1	-10525
ARMC10	4	0.27925	0.41588	0.999533	7941	2	-0.60881
TMEM99	4	0.87198	0.87228	0.999533	16726	0	-0.98303
TWF1	4	0.81133	0.81171	0.999533	15539	0	-0.62317
LBX2	4	0.98343	0.98357	0.999533	19012	0	-14825
KCMF1	4	0.98341	0.98356	0.999533	19011	0	-21937
ASPG	4	0.27508	0.41142	0.999533	7862	2	0.19092
DLG5	4	0.83918	0.83953	0.999533	16100	0	-13229
ATP6AP1	4	0.94839	0.94862	0.999533	18265	0	-17469
CWC15	4	0.93091	0.93115	0.999533	17914	0	-20109
ZSCAN12	4	0.070253	0.15925	0.987134	3092	1	-0.29531
MAPK10	4	0.25245	0.38736	0.999533	7392	2	0.12013
PRKCA	4	0.98009	0.98029	0.999533	18938	0	-13926
FTCD	4	0.75916	0.76297	0.999533	14587	1	-0.85895
PLEKHD1	4	0.15097	0.27906	0.999533	5388	1	-0.45269
AKAP9	4	0.64506	0.67922	0.999533	13069	1	-0.76256
DPT	4	0.90079	0.90104	0.999533	17319	0	-0.76437
MKNK1	4	0.55563	0.62691	0.999533	12034	1	-24658
NLGN3	4	0.9832	0.98334	0.999533	19008	0	-0.87345
RBM47	4	0.36962	0.51202	0.999533	9819	1	0.029256
FBXO21	4	0.16048	0.28917	0.999533	5570	2	-22081
AKIP1	4	0.98314	0.98328	0.999533	19007	0	-0.54176
RNF6	4	0.98312	0.98326	0.999533	19006	0	-0.99829
OXCT2	4	0.48554	0.59123	0.999533	11352	1	-10943
LMNA	4	0.9831	0.98324	0.999533	19005	0	-0.48834
B4GALT2	4	0.05846	0.13636	0.987134	2626	2	0.28988
FAM89A	4	0.98308	0.98323	0.999533	19004	0	-0.63869
METTL23	4	0.98308	0.98323	0.999533	19003	0	-13835
TNFSF12-TNFSF13	4	0.22482	0.35804	0.999533	6836	1	-0.73426
ARHGAP9	4	0.97107	0.97127	0.999533	18727	0	-0.94779
OR10A5	4	0.016452	0.050159	0.976163	995	1	-0.68994
TMEM115	4	0.074842	0.16802	0.987134	3265	1	-0.58003
CTDSPL	4	0.98302	0.98317	0.999533	19001	0	-0.55939
EGFL8	4	0.98301	0.98316	0.999533	19000	0	-0.65676
FAM170B	4	0.983	0.98315	0.999533	18999	0	-0.4368
C18orf8	4	0.84477	0.84506	0.999533	16221	0	-0.73567
C3orf35	4	0.80962	0.80997	0.999533	15511	0	-11534
FAM174A	4	0.98297	0.98313	0.999533	18998	0	-0.70269
C15orf40	4	0.82591	0.82625	0.999533	15831	0	-0.72158
SLFN12L	4	0.8954	0.89561	0.999533	17194	0	-0.50382
ANXA8	4	0.98289	0.98305	0.999533	18996	0	-0.67995
FAM21A	4	0.366	0.50822	0.999533	9743	1	-0.93465
C19orf81	4	0.19059	0.3214	0.999533	6165	1	-0.92849
SDHC	4	0.66723	0.69368	0.999533	13330	1	-24852
STYK1	4	0.21234	0.34466	0.999533	6588	2	-0.19551
RNF125	4	0.98282	0.98296	0.999533	18994	0	-0.35692
SLC16A13	4	0.72979	0.73913	0.999533	14137	1	-0.9596
ETS1	4	0.98279	0.98294	0.999533	18993	0	-0.35995
CCDC178	4	0.78676	0.78768	0.999533	15074	1	-0.26284
NARS	4	0.78096	0.78226	0.999533	14965	1	-19397
SRSF9	4	0.63228	0.67122	0.999533	12896	1	-12173
MTX2	4	0.98272	0.98288	0.999533	18992	0	-0.38764
C9orf142	4	0.98272	0.98287	0.999533	18991	0	-0.44797
EWSR1	4	0.81703	0.81737	0.999533	15661	0	-2.07
MELK	4	0.089943	0.19609	0.98945	3834	3	0.34281
DDX51	4	0.92311	0.92342	0.999533	17764	0	-62491
KRTAP5-9	4	0.91797	0.91826	0.999533	17668	0	-11693
UBE2J2	4	0.59591	0.64947	0.999533	12482	1	-0.76687
CLLU1OS	4	0.66085	0.68944	0.999533	13257	1	-0.38122
LRIG3	4	0.98263	0.98279	0.999533	18990	0	-0.76026
ABCA6	4	0.31623	0.45535	0.999533	8701	1	-0.66669
NKX2-1	4	0.9826	0.98277	0.999533	18988	0	-14452
NAV3	4	0.34824	0.48947	0.999533	9349	2	0.20109
CYP1A2	4	0.70269	0.71862	0.999533	13787	1	-0.7841
PATL1	4	0.86512	0.86543	0.999533	16609	0	-13298
EPHA5	4	0.062453	0.14411	0.987134	2801	1	-0.65552
KCNA6	4	0.46649	0.58218	0.999533	11172	1	-0.60946
HIST1H3D	4	0.8216	0.82197	0.999533	15734	0	0.18301
SCGN	4	0.98252	0.98269	0.999533	18987	0	-0.60863
ADAM8	4	0.98249	0.98267	0.999533	18986	0	-0.39132
MGLL	4	0.97687	0.97706	0.999533	18869	0	-11905
MRPS21	4	0.84609	0.84642	0.999533	16246	0	0.13117
SSTR3	4	0.98241	0.9826	0.999533	18984	0	-0.69286
FIBCD1	4	0.9824	0.98259	0.999533	18983	0	-0.66522
CYP21A2	4	0.98233	0.98252	0.999533	18980	0	-0.68043
NUDT22	4	0.028487	0.075967	0.987134	1450	2	-0.033459
LTBR	4	0.98232	0.98251	0.999533	18979	0	-0.65814
FBXO7	4	0.97962	0.97981	0.999533	18927	0	-0.83895
SYMPK	4	0.98229	0.98248	0.999533	18977	0	-23376
ZNF236	4	0.98229	0.98248	0.999533	18978	0	-4085
PTPMT1	4	0.98229	0.98248	0.999533	18976	0	-16397
GDPD2	4	0.98224	0.98243	0.999533	18975	0	-0.56526
MAP2K4	4	0.56343	0.63118	0.999533	12127	1	-0.033801
TEX28	4	0.96671	0.96693	0.999533	18625	0	-0.80185
TMED1	4	0.97301	0.97321	0.999533	18765	0	-19184
CENPN	4	0.046555	0.113	0.987134	2146	2	-0.38989
IGF2	4	0.18405	0.31438	0.999533	6029	2	-0.5138
CCDC36	4	0.98218	0.98237	0.999533	18974	0	-0.49655
AUNIP	4	0.95357	0.9538	0.999533	18371	0	-0.65661
PCSK4	4	0.89426	0.89441	0.999533	17167	0	-0.52185
SPSB2	4	0.97745	0.97763	0.999533	18882	0	-0.86844
Control_250	4	0.76978	0.77209	0.999533	14771	1	-0.85174
OR5AN1	4	0.21344	0.34583	0.999533	6609	1	-0.93631
IZUMO4	4	0.62209	0.66502	0.999533	12779	1	-0.51833
TMPRSS11A	4	0.5588	0.62865	0.999533	12072	1	-10995
PRPF6	4	0.65216	0.68381	0.999533	13149	1	-19106
ITIH5	4	0.56006	0.62931	0.999533	12091	1	-0.43295
TYR	4	0.24122	0.37551	0.999533	7182	2	-0.050029
OR5D18	4	0.026362	0.071437	0.987134	1362	1	-0.80195
AGPAT3	4	0.96715	0.96738	0.999533	18632	0	-0.698
ATP6V1E1	4	0.83046	0.83078	0.999533	15922	0	-20621
CLASP1	4	0.43368	0.56705	0.999533	10868	1	-0.65117
NCAPD3	4	0.98197	0.98217	0.999533	18973	0	-22526
MCMBP	4	0.98196	0.98216	0.999533	18972	0	-19653
RASGEF1A	4	0.27987	0.41655	0.999533	7956	1	-0.69718
APOBEC3G	4	0.95609	0.9563	0.999533	18427	0	-0.90286
FAM13A	4	0.96253	0.96275	0.999533	18541	0	-0.90361
MROH7	4	0.98191	0.98212	0.999533	18971	0	-0.92941
MPP1	4	0.57442	0.63727	0.999533	12240	1	-13482
PUS10	4	0.69695	0.71445	0.999533	13712	1	-0.83882
LRRC52	4	0.97033	0.97055	0.999533	18705	0	-0.78405
MYL6	4	0.95544	0.95565	0.999533	18409	0	-0.92293
PSMG4	4	0.67332	0.69775	0.999533	13406	1	-0.72951
Control_77	4	0.98184	0.98204	0.999533	18970	0	-0.69455
MGAM	4	0.85044	0.85081	0.999533	16328	0	-0.98895
S100A3	4	0.63825	0.67493	0.999533	12961	1	-0.041369
TAB1	4	0.88251	0.8828	0.999533	16926	0	-11927
PRR29	4	0.9818	0.982	0.999533	18968	0	-0.70719
EPN2	4	0.98178	0.98198	0.999533	18967	0	-0.77353
DNAH6	4	0.21167	0.34395	0.999533	6575	1	-0.36425
PRSS21	4	0.82508	0.82545	0.999533	15813	0	-13394
PGR	4	0.98175	0.98195	0.999533	18965	0	-13821
SIM2	4	0.73393	0.74236	0.999533	14197	1	-0.6128
CIART	4	0.079147	0.17606	0.987134	3428	1	-0.90901
PIK3R6	4	0.24693	0.38154	0.999533	7293	1	-10559
STARD13	4	0.23619	0.37016	0.999533	7075	1	-0.79092
NEK9	4	0.90393	0.90418	0.999533	17390	0	-0.97902
MBD5	4	0.88157	0.88185	0.999533	16899	0	-0.7127
AGA	4	0.98161	0.9818	0.999533	18963	0	-0.55734
FAM96A	4	0.98159	0.98178	0.999533	18962	0	-18555
ZNF74	4	0.85341	0.85379	0.999533	16381	0	-0.60252
BCKDHB	4	0.65889	0.68819	0.999533	13234	1	-0.19637
LIPI	4	0.98154	0.98173	0.999533	18961	0	-0.55417
ST6GALNAC6	4	0.98153	0.98172	0.999533	18960	0	-0.61573
HIC1	4	0.0050918	0.017704	0.876794	385	2	-0.077404
SH2D3A	4	0.98098	0.98118	0.999533	18952	0	-0.75028
DNAJA1	4	0.54269	0.61996	0.999533	11920	1	-0.99119
RHOBTB2	4	0.52475	0.61078	0.999533	11722	1	-0.06829
RABL2A	4	0.98139	0.98159	0.999533	18958	0	-11095
ZSWIM8	4	0.4521	0.57541	0.999533	11041	1	-0.54808
USP49	4	0.67005	0.69556	0.999533	13363	1	-0.54034
HEY2	4	0.64029	0.67623	0.999533	12997	1	-0.29198
ACSM2B	4	0.98129	0.98149	0.999533	18957	0	-0.81206
CCDC182	4	0.23821	0.37229	0.999533	7113	1	-0.87815
C19orf35	4	0.64163	0.67705	0.999533	13015	1	-0.43245
CCDC69	4	0.98125	0.98145	0.999533	18955	0	-0.72718
ANAPC13	4	0.9774	0.97758	0.999533	18881	0	-35389
ADCY4	4	0.98123	0.98143	0.999533	18954	0	-0.65969
PCDHGA2	4	0.54859	0.62313	0.999533	11969	1	0.20128
CST9	4	0.94344	0.94373	0.999533	18161	0	-0.77899
PGBD4	4	0.9638	0.96403	0.999533	18568	0	-0.73839
C1orf53	4	0.80017	0.8006	0.999533	15323	1	-0.80578
ADAP2	4	0.16314	0.29199	0.999533	5609	1	-0.6856
HSD17B8	4	0.92737	0.92765	0.999533	17847	0	-0.30922
SLC35B4	4	0.98108	0.98127	0.999533	18953	0	-0.52693
GPR37L1	4	0.90351	0.90374	0.999533	17379	0	-0.78233
TIMM17B	4	0.026818	0.072424	0.987134	1383	2	-0.15107
PSMB1	4	0.72197	0.73307	0.999533	14027	1	-39969
CACNA1G	4	0.95495	0.95516	0.999533	18399	0	-0.72975
FAM159B	4	0.89167	0.89184	0.999533	17119	0	-10359
ZIC5	4	0.98098	0.98118	0.999533	18951	0	-0.52139
OR10G8	4	0.80314	0.80354	0.999533	15380	1	-0.73502
DCTN6	4	0.98095	0.98115	0.999533	18950	0	-0.94357
SLCO1C1	4	0.1146	0.23993	0.995611	4658	1	-0.75249
SRRM5	4	0.22499	0.35824	0.999533	6841	1	-11285
GREB1L	4	0.22403	0.35723	0.999533	6821	2	0.16364
UBE2T	4	0.98083	0.98103	0.999533	18949	0	-10592
GORASP1	4	0.66234	0.69041	0.999533	13273	1	-0.73407
GRAP2	4	0.81679	0.81713	0.999533	15658	0	-1425
SLC2A3	4	0.3709	0.51341	0.999533	9839	1	0.087756
PSD3	4	0.80807	0.80845	0.999533	15475	0	-12694
TCEAL8	4	0.55126	0.62457	0.999533	11994	1	-0.77101
SNX21	4	0.87742	0.87769	0.999533	16828	0	-0.66621
DCTN1	4	0.98075	0.98096	0.999533	18948	0	-16418
DAW1	4	0.071736	0.1621	0.987134	3138	3	0.45037
ERICH5	4	0.95928	0.95954	0.999533	18487	0	-0.8834
DNAH9	4	0.96797	0.96817	0.999533	18647	0	-0.85779
CRYGC	4	0.9807	0.98091	0.999533	18947	0	-0.71082
GMEB2	4	0.80965	0.81	0.999533	15512	0	-0.93657
SNIP1	4	0.35647	0.49814	0.999533	9538	2	-0.47057
RACGAP1	4	0.9751	0.97529	0.999533	18832	0	-13974
CEACAM18	4	0.74192	0.74878	0.999533	14320	1	-0.73771
PIGO	4	0.98068	0.98088	0.999533	18946	0	-13453
TET2	4	0.98066	0.98087	0.999533	18945	0	-0.65611
HMCES	4	0.98064	0.98085	0.999533	18944	0	-0.56818
MTMR12	4	0.82553	0.8259	0.999533	15822	0	-0.75348
NDST2	4	0.62513	0.66687	0.999533	12813	1	-0.85762
CHRD	4	0.72999	0.73928	0.999533	14140	1	-0.14362
CDC14B	4	0.53155	0.61421	0.999533	11791	1	-12791
KRT5	4	0.84536	0.84564	0.999533	16235	0	-13901
MOB1A	4	0.34997	0.49128	0.999533	9388	2	0.053608
BCLAF1	4	0.90264	0.9029	0.999533	17358	0	-0.72603
RYR2	4	0.3642	0.50634	0.999533	9705	1	-0.11938
CDK20	4	0.68069	0.70282	0.999533	13497	1	-0.89802
SCN9A	4	0.98048	0.9807	0.999533	18943	0	-0.62486
TRAF3IP3	4	0.96155	0.96177	0.999533	18524	0	-0.90248
PDGFD	4	0.173	0.30257	0.999533	5803	1	-0.86425
GABRA2	4	0.28783	0.42508	0.999533	8134	1	-0.99808
VPS33A	4	0.69173	0.71065	0.999533	13650	1	-0.79938
PODXL	4	0.86637	0.86664	0.999533	16635	0	-0.74631
MAST2	4	0.26452	0.40017	0.999533	7639	1	-0.56404
TMOD3	4	0.7741	0.77593	0.999533	14844	1	-0.31376
RPL23	4	0.89815	0.89837	0.999533	17261	0	-0.84117
GPR21	4	0.79743	0.79787	0.999533	15277	1	-0.9059
KRTAP6-2	4	0.6154	0.66091	0.999533	12699	1	-0.84448
NAT10	4	0.88357	0.88384	0.999533	16949	0	-0.30052
VPS18	4	0.76267	0.7659	0.999533	14647	1	-0.70222
SLITRK3	4	0.62818	0.66871	0.999533	12845	1	-0.75201
NDUFA6	4	0.98032	0.98055	0.999533	18942	0	-0.61008
DMP1	4	0.96252	0.96274	0.999533	18540	0	-0.78931
HNRNPA1	4	0.16797	0.29716	0.999533	5709	1	-0.7782
SHD	4	0.93821	0.93843	0.999533	18059	0	-16175
TINAG	4	0.23761	0.37166	0.999533	7100	2	-0.52084
ENO4	4	0.98021	0.98043	0.999533	18941	0	-0.55471
ILVBL	4	0.89325	0.89342	0.999533	17152	0	-0.94889
IRF1	4	0.91547	0.91581	0.999533	17628	0	-0.61035
XAGE2	4	0.98018	0.98039	0.999533	18940	0	-0.33677
BLMH	4	0.71566	0.72818	0.999533	13946	1	-0.6191
IL18BP	4	0.98014	0.98034	0.999533	18939	0	-0.57902
SEL1L3	4	0.7756	0.7773	0.999533	14868	1	-11899
ITPA	4	0.84605	0.84637	0.999533	16245	0	-13901
KRT38	4	0.98006	0.98026	0.999533	18937	0	-0.74108
MBTD1	4	0.14941	0.27744	0.999533	5354	2	-0.5679
BCL2L11	4	0.80593	0.80626	0.999533	15429	0	-0.28568
C3orf80	4	0.56205	0.63042	0.999533	12112	1	-0.65459
MKRN2OS	4	0.9799	0.9801	0.999533	18936	0	-0.51132
NTF3	4	0.24814	0.38284	0.999533	7318	1	-14298
COL10A1	4	0.97747	0.97765	0.999533	18883	0	-0.563
HEATR1	4	0.97986	0.98006	0.999533	18935	0	-0.90499
DNM1L	4	0.97985	0.98006	0.999533	18934	0	-0.82004
NUDCD2	4	0.97983	0.98004	0.999533	18933	0	-0.52498
RUFY3	4	0.7459	0.75199	0.999533	14381	1	-0.27619
APOA2	4	0.23512	0.36902	0.999533	7048	2	0.28645
PALM3	4	0.83935	0.83969	0.999533	16103	0	-0.55759
GJB5	4	0.53067	0.61377	0.999533	11782	1	-0.80909
ACSS3	4	0.49198	0.59431	0.999533	11411	1	-0.8596
CENPI	4	0.97447	0.97465	0.999533	18813	0	-1376
GCSAM	4	0.63963	0.67583	0.999533	12984	1	-0.50641
PRCC	4	0.9797	0.9799	0.999533	18932	0	-0.43401
OR2D3	4	0.97969	0.97989	0.999533	18930	0	-0.50801
ZNF211	4	0.97038	0.97061	0.999533	18707	0	-0.29142
CDR1	4	0.97967	0.97986	0.999533	18929	0	-0.38276
CYLC2	4	0.27298	0.40918	0.999533	7814	1	-0.7685
FABP1	4	0.97964	0.97983	0.999533	18928	0	-0.35432
VAMP5	4	0.83642	0.83673	0.999533	16040	0	-0.42676
OR8H2	4	0.9519	0.95215	0.999533	18328	0	-1562
KRT31	4	0.97958	0.97978	0.999533	18926	0	-0.57662
BAD	4	0.75392	0.7586	0.999533	14499	1	-12526
HIST4H4	4	0.92614	0.9264	0.999533	17824	0	-1101
PLA2G16	4	0.97951	0.9797	0.999533	18925	0	-0.567
PRR30	4	0.011546	0.038306	0.966635	759	3	0.44228
PCOLCE2	4	0.31417	0.45316	0.999533	8660	1	-0.87588
SMAP2	4	0.97946	0.97966	0.999533	18924	0	-0.75147
MALL	4	0.97945	0.97965	0.999533	18923	0	-0.66575
DCN	4	0.40658	0.55167	0.999533	10575	2	-0.39664
NPPA	4	0.6931	0.71165	0.999533	13665	1	-0.81803
CD300LF	4	0.97939	0.97959	0.999533	18922	0	-10294
PHF2	4	0.97939	0.97959	0.999533	18921	0	-0.38707
LUC7L3	4	0.35287	0.49432	0.999533	9452	1	-15274
ZFP3	4	0.35007	0.49138	0.999533	9390	1	-0.11655
LY9	4	0.38253	0.52585	0.999533	10065	1	-0.59675
COG2	4	0.81062	0.81099	0.999533	15524	0	-14775
MYL2	4	0.80215	0.80256	0.999533	15358	1	-0.90461
C1orf229	4	0.97934	0.97954	0.999533	18920	0	-0.4911
GPR171	4	0.979	0.9792	0.999533	18916	0	-0.67214
MOB3A	4	0.84968	0.85004	0.999533	16314	0	-10097
CCL1	4	0.95416	0.9544	0.999533	18382	0	-0.71556
TECRL	4	0.041412	0.10256	0.987134	1949	2	0.34882
MEN1	4	0.97925	0.97946	0.999533	18919	0	-0.87163
SLC39A6	4	0.063388	0.1459	0.987134	2837	1	-0.63176
YIPF4	4	0.90209	0.90235	0.999533	17346	0	-0.66788
C14orf28	4	0.040577	0.10084	0.987134	1922	3	0.54779
SFPQ	4	0.97392	0.97411	0.999533	18798	0	-23469
DPP8	4	0.97915	0.97936	0.999533	18917	0	-0.54497
Control_89	4	0.93636	0.93658	0.999533	18026	0	-0.65408
KLRG2	4	0.69216	0.71096	0.999533	13655	1	-10829
GABPB2	4	0.6407	0.67648	0.999533	13003	1	-0.64829
FAM227B	4	0.87616	0.87647	0.999533	16795	0	-0.824
FASTKD1	4	0.97841	0.97862	0.999533	18903	0	-0.8712
APEH	4	0.26411	0.39974	0.999533	7631	1	-0.44717
TSPAN32	4	0.97177	0.97198	0.999533	18744	0	-0.75806
C12orf56	4	0.022661	0.063564	0.987134	1225	3	0.37238
MRGPRX2	4	0.979	0.9792	0.999533	18915	0	-0.54126
LOC100130357	4	0.58166	0.64132	0.999533	12331	1	-0.73321
Control_13	4	0.79558	0.79605	0.999533	15243	1	-0.86253
ATP5I	4	0.94164	0.94191	0.999533	18121	0	-0.81765
MCF2	4	0.95558	0.95579	0.999533	18414	0	-0.63181
SPDYE6	4	0.97892	0.97913	0.999533	18914	0	-15253
DBX2	4	0.9019	0.90217	0.999533	17344	0	-10555
CDC45	4	0.9789	0.97911	0.999533	18913	0	-0.74422
THAP3	4	0.9789	0.9791	0.999533	18912	0	-0.49958
SORCS3	4	0.59823	0.65079	0.999533	12508	1	-0.87165
TBXAS1	4	0.52081	0.60875	0.999533	11689	1	-0.61119
DRD5	4	0.32006	0.45943	0.999533	8773	1	-0.31549
TAF1A	4	0.96189	0.96209	0.999533	18531	0	-0.34415
GPHA2	4	0.9788	0.979	0.999533	18911	0	-0.51001
SHISA4	4	0.47449	0.58602	0.999533	11255	1	-0.11465
CSNK1G3	4	0.323	0.46255	0.999533	8828	1	-0.69798
CCDC6	4	0.76302	0.76619	0.999533	14653	1	-0.74139
TGM7	4	0.819	0.81938	0.999533	15692	0	-0.97376
DNTTIP2	4	0.97864	0.97887	0.999533	18909	0	-0.53555
VAMP4	4	0.41904	0.56052	0.999533	10740	1	-0.46497
LOC283710	4	0.97861	0.97884	0.999533	18908	0	-0.68397
Control_11	4	0.97857	0.97879	0.999533	18907	0	-0.57286
CTAG1A	4	0.30289	0.44116	0.999533	8435	1	-0.44605
RNF185	4	0.094994	0.20542	0.991984	4008	1	-0.95937
SLC6A18	4	0.97852	0.97873	0.999533	18906	0	-0.6092
SPEN	4	0.75962	0.76335	0.999533	14595	1	-0.99156
KRTAP19-8	4	0.9785	0.97871	0.999533	18905	0	-0.52998
VSTM2B	4	0.46365	0.58086	0.999533	11142	1	-0.33779
CSRP3	4	0.033511	0.086473	0.987134	1657	2	0.023856
GALNT11	4	0.96848	0.96869	0.999533	18658	0	-0.67105
AMACR	4	0.82542	0.8258	0.999533	15818	0	-0.55333
GDF7	4	0.97838	0.97859	0.999533	18901	0	-0.48099
CHRNA4	4	0.64575	0.67966	0.999533	13080	1	-10997
SLC35G1	4	0.97834	0.97854	0.999533	18900	0	-0.45687
HADHB	4	0.34594	0.48699	0.999533	9309	2	-0.5323
RBM33	4	0.9783	0.9785	0.999533	18899	0	-0.67857
NNAT	4	0.9783	0.97849	0.999533	18898	0	-0.45513
CPSF3	4	0.97825	0.97845	0.999533	18897	0	-35782
Control_224	4	0.66942	0.69512	0.999533	13356	1	-0.057704
PTPRB	4	0.97824	0.97843	0.999533	18896	0	-0.33278
ADNP2	4	0.59299	0.6478	0.999533	12451	1	-0.2932
ZFP14	4	0.9782	0.9784	0.999533	18895	0	-0.56645
C9orf153	4	0.68449	0.70543	0.999533	13546	1	-0.64635
ALDH8A1	4	0.26408	0.39971	0.999533	7630	2	-0.28869
NOS1AP	4	0.95628	0.9565	0.999533	18435	0	-0.89182
Control_147	4	0.1394	0.26659	0.998885	5163	2	0.016051
PSORS1C2	4	0.91406	0.91437	0.999533	17600	0	-0.8103
GFRA3	4	0.94178	0.94203	0.999533	18124	0	-11264
MCAT	4	0.44916	0.57405	0.999533	11012	1	-0.87813
PPP2R2C	4	0.97798	0.97818	0.999533	18893	0	-0.439
GPR34	4	0.93159	0.93185	0.999533	17925	0	-0.95178
KDM1B	4	0.96049	0.96073	0.999533	18511	0	-10814
FAM43B	4	0.93482	0.93509	0.999533	17992	0	-0.537
TSPAN31	4	0.97791	0.9781	0.999533	18892	0	-0.82008
DNAJC1	4	0.58175	0.64136	0.999533	12332	1	-0.59258
TNFRSF12A	4	0.32777	0.46765	0.999533	8929	1	-0.75204
IKZF3	4	0.11566	0.24106	0.995611	4678	2	-0.22159
GLG1	4	0.5417	0.61944	0.999533	11909	1	-12562
DHPS	4	0.94403	0.94431	0.999533	18174	0	-37028
NDUFA2	4	0.71117	0.72488	0.999533	13889	1	-14424
OR1A2	4	0.97786	0.97805	0.999533	18891	0	-0.45707
RAB25	4	0.80512	0.80547	0.999533	15414	1	-0.45802
OR4F3	4	0.29157	0.42906	0.999533	8206	1	-1.5
PTPRS	4	0.3228	0.46235	0.999533	8824	1	-0.58102
OR13C3	4	0.97779	0.97798	0.999533	18890	0	-0.57545
TDO2	4	0.8635	0.86381	0.999533	16585	0	-0.33525
SLC5A10	4	0.7269	0.73692	0.999533	14096	1	-0.85357
SNRPB	4	0.021747	0.061645	0.987134	1184	2	-0.12156
KRTAP10-7	4	0.97762	0.97781	0.999533	18888	0	-0.50383
MAP2K5	4	0.066121	0.15126	0.987134	2939	2	-0.16544
CELA2B	4	0.95485	0.95507	0.999533	18397	0	-0.94861
ZNF605	4	0.9776	0.97779	0.999533	18887	0	-0.50359
LDLR	4	0.48451	0.59074	0.999533	11339	1	-0.63992
ANAPC10	4	0.60765	0.65632	0.999533	12608	1	-34595
RCOR2	4	0.97756	0.97775	0.999533	18885	0	-0.58338
PCGF1	4	0.97756	0.97775	0.999533	18886	0	-0.67378
HACD2	4	0.97755	0.97774	0.999533	18884	0	-0.61249
CYS1	4	0.84786	0.8482	0.999533	16277	0	-11934
SPATA16	4	0.30552	0.44392	0.999533	8490	1	-0.21067
KIR2DL4	4	0.84213	0.84248	0.999533	16164	0	-0.97432
PLS3	4	0.30363	0.44193	0.999533	8448	1	-0.7656
CDK5R1	4	0.66418	0.69167	0.999533	13292	1	-1028
BEX4	4	0.27905	0.41567	0.999533	7935	2	0.20022
KLRC1	4	0.97165	0.97185	0.999533	18741	0	-0.74646
CCNB1	4	0.97736	0.97754	0.999533	18880	0	-0.93012
PDE6C	4	0.69723	0.71464	0.999533	13718	1	-0.15602
RNF20	4	0.97734	0.9775	0.999533	18879	0	-10913
NACC1	4	0.35889	0.50071	0.999533	9591	2	-0.63749
TMEM89	4	0.66307	0.69089	0.999533	13278	1	-14954
TMEM198	4	0.74333	0.74994	0.999533	14343	1	-0.73634
SMOC2	4	0.97727	0.97744	0.999533	18878	0	-0.52375
DPYSL4	4	0.87848	0.8788	0.999533	16846	0	-0.75704
COQ6	4	0.29711	0.435	0.999533	8314	1	-0.80362
GNB2L1	4	0.97725	0.97742	0.999533	18877	0	-30393
EPHB1	4	0.14026	0.26754	0.998885	5179	2	-0.37546
NYAP1	4	0.92775	0.92802	0.999533	17858	0	-0.70682
UBE2W	4	0.95688	0.95708	0.999533	18447	0	-0.83173
GPR89A	4	0.19948	0.33091	0.999533	6337	2	-15674
DLG4	4	0.84479	0.84508	0.999533	16222	0	-11998
KIAA2022	4	0.80111	0.80153	0.999533	15339	1	-0.76366
TUBGCP4	4	0.97717	0.97735	0.999533	18875	0	-0.70548
ZNHIT2	4	0.97717	0.97734	0.999533	18874	0	-25997
GALNT8	4	0.97714	0.97732	0.999533	18873	0	-0.53984
TPST2	4	0.33029	0.47035	0.999533	8976	1	-0.52325
SLU7	4	0.80998	0.81033	0.999533	15514	0	-14131
LOC388849	4	0.12481	0.25089	0.995611	4875	2	-0.21647
C19orf38	4	0.18136	0.3115	0.999533	5971	2	-0.57305
MEI4	4	0.97702	0.97719	0.999533	18872	0	-0.67387
BAALC	4	0.94971	0.94992	0.999533	18294	0	-0.77495
DEFB110	4	0.83462	0.83491	0.999533	16010	0	-0.8087
FN3K	4	0.97695	0.97713	0.999533	18871	0	-0.6497
Control_81	4	0.90147	0.90174	0.999533	17337	0	-0.94139
MAMDC4	4	0.44996	0.57443	0.999533	11020	1	-36437
THOC1	4	0.92341	0.92372	0.999533	17770	0	-13595
C5orf42	4	0.30079	0.43891	0.999533	8398	1	-10241
PDE6B	4	0.97689	0.97708	0.999533	18870	0	-0.57344
RASL12	4	0.7918	0.79241	0.999533	15171	1	-11313
PLD2	4	0.26506	0.40074	0.999533	7650	1	-0.27067
TXNDC2	4	0.81136	0.81174	0.999533	15540	0	-0.25026
RFX2	4	0.15676	0.28526	0.999533	5502	2	-0.46851
UHMK1	4	0.97681	0.977	0.999533	18867	0	-0.59057
HDGF	4	0.97681	0.97699	0.999533	18866	0	-11144
MAGEB1	4	0.19968	0.33114	0.999533	6341	1	-0.59026
UTP3	4	0.027931	0.074795	0.987134	1427	1	-2.27
PCYOX1	4	0.22433	0.35754	0.999533	6825	2	-0.27819
SNX32	4	0.97665	0.97686	0.999533	18863	0	-15246
NDUFS3	4	0.84433	0.84464	0.999533	16209	0	-0.51965
CLK2	4	0.97664	0.97685	0.999533	18862	0	-17774
ZNF860	4	0.28104	0.41779	0.999533	7980	1	0.15047
KIF13B	4	0.97662	0.97683	0.999533	18861	0	-10198
PARP1	4	0.1198	0.24553	0.995611	4760	1	-10145
ARHGEF9	4	0.51387	0.60521	0.999533	11622	1	0.1116
NUBP2	4	0.97655	0.97675	0.999533	18858	0	-28332
MC2R	4	0.97655	0.97675	0.999533	18859	0	-18037
BRINP2	4	0.97655	0.97675	0.999533	18860	0	-0.80257
SRD5A1	4	0.29729	0.43519	0.999533	8321	1	-0.79421
HIST1H3F	4	0.97651	0.97671	0.999533	18857	0	-0.73836
TINF2	4	0.97645	0.97666	0.999533	18856	0	-0.86388
ARL8A	4	0.29545	0.43318	0.999533	8285	1	-12341
REL	4	0.2134	0.34579	0.999533	6607	1	-0.76628
KLHDC9	4	0.29431	0.43197	0.999533	8259	1	-0.6789
CYP11A1	4	0.97637	0.9766	0.999533	18854	0	-0.62438
ZDHHC11	4	0.091816	0.1995	0.99125	3891	3	0.43835
LPAR4	4	0.78261	0.78381	0.999533	14996	1	0.0092735
WDR33	4	0.85913	0.85948	0.999533	16504	0	-0.943
CPSF4L	4	0.97631	0.97654	0.999533	18853	0	-0.97561
BCL11A	4	0.97629	0.97652	0.999533	18852	0	-0.65078
OR5T1	4	0.66546	0.69253	0.999533	13306	1	-0.35461
THAP5	4	0.97626	0.9765	0.999533	18851	0	-0.44279
DRD3	4	0.97621	0.97645	0.999533	18850	0	-0.51489
FAM86B1	4	0.70801	0.72246	0.999533	13858	1	-0.64152
CPM	4	0.95325	0.9535	0.999533	18360	0	-10218
FAM160A1	4	0.82409	0.82449	0.999533	15790	0	-0.65661
TNFAIP8	4	0.97616	0.97639	0.999533	18848	0	-0.67163
RASGRF1	4	0.36565	0.50785	0.999533	9734	2	-0.4094
NLRP9	4	0.54288	0.62007	0.999533	11921	1	-0.50369
COQ3	4	0.9728	0.97302	0.999533	18762	0	-10743
TTC21A	4	0.90429	0.90452	0.999533	17395	0	-11063
MFSD4	4	0.69544	0.71336	0.999533	13692	1	-0.78509
ALG8	4	0.97609	0.97631	0.999533	18847	0	-0.41784
APBB2	4	0.97608	0.97631	0.999533	18846	0	-0.76686
TSPAN5	4	0.87084	0.87113	0.999533	16708	0	-0.57372
HADH	4	0.82347	0.82384	0.999533	15771	0	-0.74946
PCDHGA3	4	0.29087	0.42832	0.999533	8184	1	-0.4509
P2RY13	4	0.83372	0.83402	0.999533	15992	0	-10399
LSM6	4	0.63486	0.67286	0.999533	12919	1	-0.65885
IL6ST	4	0.89038	0.89058	0.999533	17094	0	-0.19674
RPS14	4	0.97596	0.97618	0.999533	18845	0	-14987
EIF2B5	4	0.050437	0.1206	0.987134	2310	1	-0.533
NEIL3	4	0.59583	0.64943	0.999533	12479	1	-0.71857
RPUSD3	4	0.39944	0.54394	0.999533	10423	1	-11856
PHGR1	4	0.97584	0.97607	0.999533	18843	0	-0.45384
MBLAC1	4	0.97583	0.97606	0.999533	18842	0	-0.52423
OCM2	4	0.24856	0.38328	0.999533	7325	2	-0.3037
TRMT6	4	0.77062	0.77281	0.999533	14783	1	-0.19342
SLC13A1	4	0.93781	0.93804	0.999533	18053	0	-0.59117
METTL7A	4	0.97543	0.97564	0.999533	18837	0	-11242
ADAR	4	0.66676	0.69338	0.999533	13324	1	-12018
GJA9	4	0.20934	0.34148	0.999533	6520	1	-0.61198
GLRX	4	0.55589	0.62706	0.999533	12038	1	-0.49094
COL20A1	4	0.71969	0.7313	0.999533	14001	1	-12125
AVPR1B	4	0.93888	0.93909	0.999533	18067	0	-0.51466
GSTA1	4	0.92227	0.92257	0.999533	17746	0	-0.86977
BCL2	4	0.47006	0.5839	0.999533	11206	1	-0.4019
BCAN	4	0.37999	0.5231	0.999533	10021	1	-14234
GPR174	4	0.73161	0.74056	0.999533	14160	1	-0.66639
E2F3	4	0.95804	0.95827	0.999533	18465	0	-17202
NOX1	4	0.33861	0.47917	0.999533	9150	1	-10311
TMA7	4	0.84544	0.84572	0.999533	16237	0	-0.054406
ZNF112	4	0.33268	0.47291	0.999533	9020	1	-0.63136
GNPTAB	4	0.9755	0.97571	0.999533	18838	0	-0.28977
PATE1	4	0.84141	0.84175	0.999533	16146	0	-0.44609
MXRA8	4	0.2053	0.33716	0.999533	6447	1	-0.89964
PTBP2	4	0.58054	0.64069	0.999533	12319	1	-0.062681
TRPS1	4	0.9304	0.93064	0.999533	17906	0	-0.76885
C1orf54	4	0.97541	0.97561	0.999533	18836	0	-0.62113
PCDH7	4	0.309	0.44757	0.999533	8553	2	0.09535
MAP3K2	4	0.41535	0.55892	0.999533	10702	1	-0.70838
BMP8B	4	0.94026	0.94052	0.999533	18095	0	-0.87687
POU2AF1	4	0.13231	0.25896	0.996197	5029	1	-13935
NXPE4	4	0.7629	0.76608	0.999533	14649	1	-0.71162
HDAC6	4	0.40241	0.54719	0.999533	10490	2	-0.20195
TMEM168	4	0.68225	0.70389	0.999533	13512	1	-0.7004
CXCL1	4	0.13949	0.26669	0.998885	5164	2	-0.89201
ANKRD36	4	0.84491	0.84522	0.999533	16224	0	-22202
FADS2	4	0.97519	0.97538	0.999533	18835	0	-0.62029
MMP28	4	0.91879	0.91907	0.999533	17693	0	-10168
RAB34	4	0.97516	0.97535	0.999533	18834	0	-0.59264
CADM2	4	0.76971	0.77203	0.999533	14768	1	-0.94882
FASTK	4	0.97515	0.97535	0.999533	18833	0	-0.38437
SLC5A4	4	0.83282	0.83315	0.999533	15972	0	-0.33552
ARMC8	4	0.97346	0.97366	0.999533	18781	0	-0.96169
NOL12	4	0.88664	0.88683	0.999533	17024	0	-15765
TCF4	4	0.76823	0.77074	0.999533	14745	1	-0.90335
EPSTI1	4	0.6454	0.67943	0.999533	13074	1	-0.74004
PRKAR2A	4	0.93608	0.93635	0.999533	18020	0	-0.95152
FKBP7	4	0.061938	0.14311	0.987134	2780	3	0.54614
TMEM41B	4	0.33783	0.47835	0.999533	9134	1	-0.68735
RGS18	4	0.97498	0.97517	0.999533	18831	0	-0.41344
CDK17	4	0.97497	0.97516	0.999533	18830	0	-0.84709
ZHX3	4	0.32681	0.46661	0.999533	8909	1	-0.84152
KRTAP19-5	4	0.34395	0.48484	0.999533	9268	1	-0.50455
FAM195A	4	0.77026	0.77249	0.999533	14779	1	0.10993
PSG4	4	0.97489	0.97506	0.999533	18829	0	-0.40344
UQCR10	4	0.97489	0.97506	0.999533	18828	0	-0.51677
CD248	4	0.80402	0.80438	0.999533	15395	1	-0.97445
TACR3	4	0.93558	0.93585	0.999533	18008	0	-0.51417
FAM102A	4	0.97481	0.975	0.999533	18827	0	-0.80072
ACOT4	4	0.81213	0.81248	0.999533	15554	0	-0.34163
LAMA2	4	0.81342	0.81376	0.999533	15596	0	-0.61155
NOP56	4	0.97478	0.97496	0.999533	18826	0	-31227
CALCOCO2	4	0.88014	0.88044	0.999533	16877	0	-0.13255
OR4F17	4	0.97475	0.97492	0.999533	18825	0	-0.85599
MAML2	4	0.97475	0.97492	0.999533	18824	0	-0.98665
SPEG	4	0.97473	0.9749	0.999533	18823	0	-0.43944
RPH3A	4	0.61593	0.66124	0.999533	12708	1	-0.87892
ZBED3	4	0.65242	0.68396	0.999533	13151	1	-0.60443
DHCR7	4	0.97468	0.97486	0.999533	18822	0	-0.88473
R3HCC1L	4	0.94382	0.94411	0.999533	18167	0	-0.18394
AIFM2	4	0.7031	0.71892	0.999533	13795	1	-0.96235
SMAD7	4	0.97464	0.97481	0.999533	18821	0	-0.87707
IL1RL2	4	0.97463	0.97481	0.999533	18820	0	-0.33803
OR8G2	4	0.87352	0.87383	0.999533	16752	0	-0.024387
PRR21	4	0.97458	0.97476	0.999533	18819	0	-0.33278
UBAP2L	4	0.97455	0.97473	0.999533	18818	0	-0.71698
STXBP6	4	0.20313	0.33484	0.999533	6406	1	-0.34649
MRE11A	4	0.97455	0.97473	0.999533	18817	0	-0.62029
PIGN	4	0.86522	0.86554	0.999533	16611	0	-0.5604
CRHR1	4	0.97453	0.97471	0.999533	18816	0	-0.74949
SLC25A27	4	0.77077	0.77293	0.999533	14786	1	-0.81
TRIM72	4	0.042512	0.10479	0.987134	1991	2	0.0014792
C4orf46	4	0.44133	0.57047	0.999533	10935	1	-0.99489
NPSR1	4	0.97449	0.97467	0.999533	18815	0	-0.91714
GPR152	4	0.75786	0.7619	0.999533	14564	1	-0.74775
NAF1	4	0.97447	0.97465	0.999533	18814	0	-12426
LMO2	4	0.97446	0.97464	0.999533	18812	0	-0.33584
U2SURP	4	0.55064	0.62421	0.999533	11990	1	-10911
RRN3	4	0.93008	0.93032	0.999533	17902	0	-0.84202
ADGRL1	4	0.97444	0.97462	0.999533	18810	0	-0.39563
PPP1R9B	4	0.97444	0.97462	0.999533	18811	0	-0.97036
TBC1D32	4	0.97441	0.97458	0.999533	18809	0	-0.56005
MSL2	4	0.32419	0.46383	0.999533	8849	1	-0.22721
QSER1	4	0.95067	0.95092	0.999533	18311	0	-0.62154
EXOC7	4	0.63982	0.67594	0.999533	12988	1	-0.94403
KAT7	4	0.97435	0.97453	0.999533	18808	0	-0.49211
SLK	4	0.9743	0.97448	0.999533	18806	0	-0.52878
LPCAT1	4	0.97284	0.97306	0.999533	18763	0	-0.82287
CHAF1A	4	0.97425	0.97444	0.999533	18805	0	-20127
OR1S1	4	0.97423	0.97443	0.999533	18804	0	-0.62506
ROBO3	4	0.97421	0.9744	0.999533	18803	0	-0.54844
KIAA0753	4	0.82037	0.8207	0.999533	15713	0	-0.26121
MTMR14	4	0.97412	0.97431	0.999533	18802	0	-0.40756
PHRF1	4	0.9507	0.95095	0.999533	18312	0	-0.95683
SPRR2D	4	0.5203	0.60849	0.999533	11681	1	-0.77984
ZFYVE19	4	0.48408	0.59053	0.999533	11334	1	-0.48186
DOCK7	4	0.97403	0.97422	0.999533	18800	0	-0.90915
GALNT14	4	0.97399	0.97418	0.999533	18799	0	-1.27
UBQLN1	4	0.18892	0.31958	0.999533	6130	1	-0.77251
RPL37A	4	0.97392	0.97411	0.999533	18794	0	-22918
RPL30	4	0.97392	0.97411	0.999533	18796	0	-32333
UBP1	4	0.97392	0.97411	0.999533	18795	0	-0.98614
KIF4A	4	0.97392	0.97411	0.999533	18797	0	-24785
EPRS	4	0.97291	0.97312	0.999533	18764	0	-10926
RESP18	4	0.50304	0.59976	0.999533	11516	1	-0.54276
APOL2	4	0.97386	0.97405	0.999533	18793	0	-0.83179
CARD14	4	0.65554	0.686	0.999533	13189	1	-0.94913
RP1	4	0.97383	0.97402	0.999533	18791	0	-0.43369
PAK1IP1	4	0.1917	0.32258	0.999533	6183	1	-54789
TNFSF13	4	0.9738	0.974	0.999533	18789	0	-0.41435
SPATA33	4	0.3596	0.50144	0.999533	9612	2	-0.084009
SULT1A2	4	0.93328	0.93356	0.999533	17963	0	-0.68442
BSND	4	0.97374	0.97394	0.999533	18788	0	-0.69829
DCUN1D4	4	0.87843	0.87874	0.999533	16844	0	-0.44089
ZDHHC15	4	0.91	0.91031	0.999533	17515	0	-0.43953
KIAA0355	4	0.97369	0.97388	0.999533	18787	0	-0.69849
KIAA0825	4	0.89643	0.89665	0.999533	17225	0	-0.57611
HPD	4	0.57762	0.63906	0.999533	12279	1	-0.71713
PTPRM	4	0.28587	0.42292	0.999533	8088	1	-0.77797
ELF4	4	0.64406	0.67859	0.999533	13056	1	-0.6031
SPTBN2	4	0.97363	0.97382	0.999533	18786	0	-0.45442
BCL2L2-PABPN1	4	0.093939	0.20347	0.99125	3968	1	-0.87317
RPL12	4	0.97359	0.97379	0.999533	18784	0	-35626
Control_108	4	0.76333	0.76645	0.999533	14661	1	-0.13925
UNC79	4	0.93227	0.93254	0.999533	17936	0	-0.69157
CAMKV	4	0.97356	0.97376	0.999533	18783	0	-0.96898
MFN1	4	0.75364	0.75836	0.999533	14494	1	0.005438
IDH3A	4	0.97348	0.97368	0.999533	18782	0	-10753
GAB4	4	0.68748	0.70758	0.999533	13586	1	-0.56035
GRAMD2	4	0.78631	0.78725	0.999533	15066	1	-0.13432
GHDC	4	0.97343	0.97362	0.999533	18780	0	-0.47054
SORBS3	4	0.05904	0.13746	0.987134	2653	2	0.20593
FXYD4	4	0.97335	0.97355	0.999533	18779	0	-0.48735
RCC2	4	0.68249	0.70406	0.999533	13521	1	-0.47783
GSS	4	0.97334	0.97355	0.999533	18778	0	-0.44216
RIMS4	4	0.71998	0.73153	0.999533	14005	1	-0.27712
RHOU	4	0.9733	0.9735	0.999533	18777	0	-0.66321
TRPC4	4	0.97329	0.97349	0.999533	18776	0	-0.45332
SIPA1	4	0.79147	0.79209	0.999533	15166	1	0.04439
FOXN3	4	0.97328	0.97347	0.999533	18775	0	-0.57108
KPNA5	4	0.97326	0.97346	0.999533	18774	0	-0.74777
MYBL1	4	0.85706	0.85745	0.999533	16465	0	-0.8816
A1CF	4	0.272	0.4081	0.999533	7795	2	-0.03586
FLT4	4	0.97322	0.97341	0.999533	18771	0	-0.48889
ATP1A2	4	0.95839	0.95863	0.999533	18473	0	-0.82939
OR9Q1	4	0.97321	0.9734	0.999533	18770	0	-0.59704
KIF5B	4	0.97319	0.97338	0.999533	18769	0	-0.58607
DDI2	4	0.93231	0.93257	0.999533	17938	0	-0.55286
PATE3	4	0.97315	0.97334	0.999533	18768	0	-0.66
RB1CC1	4	0.97312	0.97332	0.999533	18767	0	-0.61958
PRDM14	4	0.86245	0.86281	0.999533	16562	0	-0.73117
PHYH	4	0.68869	0.70844	0.999533	13605	1	-0.83662
CT47A3	4	0.92833	0.92859	0.999533	17869	0	-15283
PFKP	4	0.29493	0.43264	0.999533	8273	2	0.011002
SKP2	4	0.011033	0.036725	0.966635	724	1	-11937
PUM2	4	0.97304	0.97323	0.999533	18766	0	-0.71454
EIF3F	4	0.80267	0.80308	0.999533	15368	1	-0.41647
C2orf42	4	0.54694	0.62226	0.999533	11956	1	-0.53224
DQX1	4	0.19152	0.3224	0.999533	6181	1	-0.675
TP73	4	0.34339	0.48423	0.999533	9254	1	-0.016469
CASD1	4	0.95781	0.95804	0.999533	18460	0	-0.69167
IL25	4	0.031869	0.08302	0.987134	1587	3	0.46517
KARS	4	0.76578	0.76856	0.999533	14707	1	-0.46719
NLRP14	4	0.93716	0.93741	0.999533	18043	0	-0.72652
TSG101	4	0.14115	0.2685	0.998885	5200	2	-0.029505
NUP37	4	0.93858	0.9388	0.999533	18064	0	-0.8973
WNK3	4	0.82382	0.82419	0.999533	15785	0	-0.90728
ASZ1	4	0.97278	0.97299	0.999533	18761	0	-0.67225
IFT140	4	0.59961	0.6516	0.999533	12523	1	-0.24335
SREBF1	4	0.7595	0.76325	0.999533	14592	1	-10336
GRPR	4	0.34752	0.48868	0.999533	9338	1	-0.61486
SMCP	4	0.67406	0.69826	0.999533	13416	1	-0.56482
PITX1	4	0.97269	0.9729	0.999533	18760	0	-0.46767
CRB2	4	0.62178	0.66483	0.999533	12776	1	-0.97902
MMGT1	4	0.97266	0.97287	0.999533	18759	0	-0.63354
LYSMD3	4	0.012487	0.041239	0.966635	822	3	0.67075
OR5AC2	4	0.97254	0.97275	0.999533	18758	0	-0.425
EPB41L1	4	0.97252	0.97273	0.999533	18757	0	-0.94609
ATP6AP2	4	0.74959	0.75501	0.999533	14441	1	-17163
HINFP	4	0.97246	0.97267	0.999533	18756	0	-0.84069
ADCY6	4	0.28549	0.42253	0.999533	8080	2	0.0072788
PPARD	4	0.0082626	0.027995	0.945442	570	2	0.51783
PPP1R12C	4	0.97245	0.97266	0.999533	18755	0	-0.45157
ALB	4	0.97243	0.97264	0.999533	18753	0	-0.60996
FAM214B	4	0.97241	0.97262	0.999533	18752	0	-0.61492
CASKIN1	4	0.2451	0.37955	0.999533	7257	1	-0.83949
ZYG11A	4	0.38838	0.53206	0.999533	10185	2	0.1165
UBR3	4	0.38317	0.52649	0.999533	10082	2	-0.33346
LRRIQ1	4	0.76113	0.76463	0.999533	14624	1	-0.38819
TSTD2	4	0.61136	0.65851	0.999533	12649	1	-0.28402
WDR62	4	0.97229	0.97251	0.999533	18751	0	-0.42347
GAS7	4	0.39094	0.53478	0.999533	10239	1	-0.59268
IFNGR1	4	0.44863	0.57381	0.999533	11005	1	-0.74783
ASAH2B	4	0.84028	0.84064	0.999533	16122	0	-0.82844
RBP7	4	0.97219	0.97241	0.999533	18750	0	-0.34097
TMEM102	4	0.68601	0.70654	0.999533	13564	1	0.034629
ZW10	4	0.65412	0.68508	0.999533	13166	1	-11855
38412	4	0.91672	0.91705	0.999533	17647	0	-11957
CAMTA1	4	0.60197	0.65297	0.999533	12552	1	-0.62688
CDKN2AIP	4	0.97207	0.97227	0.999533	18749	0	-0.35077
PRKCG	4	0.56647	0.63286	0.999533	12163	1	-0.67797
STYX	4	0.21625	0.34888	0.999533	6668	2	-0.79965
DDX55	4	0.972	0.9722	0.999533	18748	0	-12028
ITGB4	4	0.96453	0.96476	0.999533	18579	0	-0.79751
OGT	4	0.64337	0.67814	0.999533	13046	1	-15539
FAM122A	4	0.97194	0.97214	0.999533	18747	0	-0.54594
LYRM5	4	0.33851	0.47906	0.999533	9147	1	-0.93661
CYP46A1	4	0.97126	0.97145	0.999533	18735	0	-0.51962
OGDH	4	0.85226	0.85264	0.999533	16364	0	-43843
HOXB4	4	0.97186	0.97206	0.999533	18745	0	-0.53139
EVI2B	4	0.84911	0.84946	0.999533	16302	0	-0.31024
OR1L4	4	0.85562	0.85601	0.999533	16431	0	-0.70805
VSIG4	4	0.33277	0.47303	0.999533	9022	1	-0.68764
HTR4	4	0.97177	0.97197	0.999533	18743	0	-11489
METTL14	4	0.004203	0.014745	0.873452	326	1	-0.3467
HSF1	4	0.97172	0.97193	0.999533	18742	0	-0.70043
ATP6V1B1	4	0.73201	0.74087	0.999533	14166	1	-0.64669
C15orf32	4	0.33999	0.48062	0.999533	9181	1	-10485
TEC	4	0.75158	0.75665	0.999533	14470	1	-0.32815
SF3A3	4	0.94799	0.94824	0.999533	18257	0	-39016
B4GALT4	4	0.23983	0.37404	0.999533	7150	2	0.30277
C4orf26	4	0.97149	0.97169	0.999533	18738	0	-0.77244
RPH3AL	4	0.11014	0.23284	0.995611	4510	1	-0.14686
DGKD	4	0.13644	0.26342	0.998223	5107	1	-0.32294
DCD	4	0.93149	0.93176	0.999533	17923	0	-11694
APEX1	4	0.97136	0.97155	0.999533	18737	0	-11574
COMT	4	0.7579	0.76193	0.999533	14565	1	-0.30622
NAP1L3	4	0.9713	0.97149	0.999533	18736	0	-0.40566
GS1-259H13.2	4	0.94887	0.94908	0.999533	18277	0	-0.74976
ADCY9	4	0.090225	0.1966	0.98945	3845	2	0.078978
SLC25A46	4	0.10985	0.23232	0.995611	4504	1	-0.72184
ZNF551	4	0.9003	0.90054	0.999533	17309	0	-0.68676
SNAPC4	4	0.97125	0.97145	0.999533	18734	0	-0.55355
PTHLH	4	0.89008	0.89029	0.999533	17087	0	-0.69284
MSRB1	4	0.97121	0.9714	0.999533	18733	0	-0.60306
BAG1	4	0.85205	0.85243	0.999533	16360	0	-0.33273
APOL6	4	0.97116	0.97135	0.999533	18731	0	-0.63221
FAM117B	4	0.97115	0.97135	0.999533	18730	0	-0.39378
ZNF668	4	0.97114	0.97133	0.999533	18728	0	-0.36858
PTH	4	0.6107	0.65812	0.999533	12640	1	-0.035844
TLR1	4	0.97107	0.97127	0.999533	18726	0	-0.50949
ADAMTS20	4	0.96876	0.96895	0.999533	18668	0	-0.8304
SLC26A9	4	0.8696	0.8699	0.999533	16689	0	-0.67912
CENPP	4	0.97101	0.97121	0.999533	18724	0	-10546
RPS9	4	0.97101	0.97121	0.999533	18723	0	-35542
FRMPD2	4	0.69144	0.71044	0.999533	13645	1	-0.36538
MRPS6	4	0.72158	0.73275	0.999533	14023	1	-0.78621
HEY1	4	0.90896	0.90928	0.999533	17495	0	-0.55769
ORC6	4	0.049741	0.11926	0.987134	2284	1	-12537
ANKLE1	4	0.83984	0.84018	0.999533	16116	0	-0.94532
ARFGAP3	4	0.97088	0.97108	0.999533	18722	0	-0.44382
IRX4	4	0.065451	0.14998	0.987134	2916	1	-0.79285
PDK2	4	0.83199	0.83235	0.999533	15950	0	-13671
S1PR4	4	0.83285	0.83318	0.999533	15973	0	-0.76854
KCNT1	4	0.97082	0.97102	0.999533	18721	0	-0.49667
FAM110B	4	0.50236	0.59943	0.999533	11510	1	-0.81898
EIF4A3	4	0.97079	0.97098	0.999533	18720	0	-26985
ANGPTL3	4	0.88167	0.88195	0.999533	16902	0	-0.326
TRAK1	4	0.055186	0.12998	0.987134	2491	3	0.36768
OSTM1	4	0.97076	0.97094	0.999533	18719	0	-0.67174
ID2	4	0.53577	0.61635	0.999533	11843	1	-0.67513
RPL28	4	0.9707	0.9709	0.999533	18718	0	-23616
SEC61G	4	0.97068	0.97088	0.999533	18717	0	-0.57953
ASCC1	4	0.97066	0.97086	0.999533	18716	0	-0.84788
MC4R	4	0.54874	0.6232	0.999533	11970	1	-0.92701
MIF	4	0.97064	0.97085	0.999533	18715	0	-15408
SIL1	4	0.97058	0.9708	0.999533	18714	0	-0.48394
KRT78	4	0.56829	0.63385	0.999533	12178	1	-0.30563
SEC11A	4	0.97057	0.97079	0.999533	18713	0	-0.39049
WNT7A	4	0.7303	0.73952	0.999533	14146	1	-0.64022
CYB5R3	4	0.97051	0.97073	0.999533	18712	0	-11093
CNOT4	4	0.8724	0.87271	0.999533	16731	0	-0.80204
C1QL4	4	0.62753	0.66833	0.999533	12839	1	-0.15382
SHISA2	4	0.46575	0.58182	0.999533	11166	1	-0.54436
MAGEA2B	4	0.06528	0.14965	0.987134	2911	2	0.37189
EFNA4	4	0.20254	0.33423	0.999533	6388	1	-0.98042
TTC30B	4	0.78536	0.78634	0.999533	15047	1	-0.69313
GRAMD1C	4	0.81264	0.81299	0.999533	15570	0	-0.82937
ARL10	4	0.10373	0.2212	0.993424	4309	1	-0.39432
KL	4	0.47635	0.5869	0.999533	11280	1	-0.83559
WASF1	4	0.064841	0.14876	0.987134	2886	2	-0.17495
MTERF3	4	0.89989	0.9001	0.999533	17300	0	-0.74777
EIF4G1	4	0.41699	0.55963	0.999533	10726	1	-22656
KIAA1211	4	0.67548	0.69919	0.999533	13432	1	-15595
WBSCR27	4	0.82325	0.82361	0.999533	15767	0	-11057
AURKB	4	0.17722	0.30703	0.999533	5901	1	0.11544
DMD	4	0.59326	0.64796	0.999533	12455	1	-0.0041804
NDUFA4L2	4	0.95141	0.95167	0.999533	18319	0	-11733
SWSAP1	4	0.47262	0.58512	0.999533	11232	1	-11743
OR6C65	4	0.11757	0.2431	0.995611	4711	2	-0.21842
FAM53C	4	0.3946	0.53871	0.999533	10323	2	-0.5613
GOLGA6L2	4	0.090995	0.198	0.990363	3868	3	0.30795
ACOT7	4	0.70823	0.72263	0.999533	13860	1	-0.12578
CLRN1	4	0.35567	0.4973	0.999533	9518	2	0.11799
XKR9	4	0.86793	0.86822	0.999533	16656	0	-0.74117
RPP40	4	0.22569	0.35898	0.999533	6855	2	-0.50522
DNAL1	4	0.54508	0.62125	0.999533	11942	1	-0.33981
OR4C6	4	0.26259	0.39809	0.999533	7596	2	-0.41715
F13A1	4	0.95736	0.95758	0.999533	18454	0	-0.71892
PTRF	4	0.92453	0.92481	0.999533	17791	0	-0.88177
MRPL13	4	0.73846	0.74598	0.999533	14263	1	-0.90609
CALML6	4	0.80262	0.80303	0.999533	15367	1	-0.46734
ACP6	4	0.2567	0.3918	0.999533	7484	1	-1054
PPP1CA	4	0.90973	0.91004	0.999533	17510	0	-0.8073
LBR	4	0.56159	0.63015	0.999533	12107	1	-0.73656
ABLIM1	4	0.027273	0.073385	0.987134	1400	1	-0.82108
RIMBP3	4	0.10971	0.23209	0.995611	4499	1	-0.39777
ZGRF1	4	0.70854	0.72285	0.999533	13862	1	0.012254
DPP7	4	0.204	0.33574	0.999533	6428	1	-0.88082
TAS2R39	4	0.89488	0.89506	0.999533	17181	0	-0.18501
CHAC1	4	0.24067	0.37493	0.999533	7171	2	-0.039237
SIM1	4	0.49126	0.59398	0.999533	11403	1	-0.57486
DACT2	4	0.15907	0.28767	0.999533	5545	2	-0.10453
ISLR	4	0.89061	0.8908	0.999533	17100	0	-0.5259
MYH3	4	0.031516	0.082302	0.987134	1571	2	0.22503
IWS1	4	0.29047	0.42789	0.999533	8180	2	0.10487
GNG11	4	0.61878	0.66299	0.999533	12742	1	-0.4429
CRNKL1	4	0.88909	0.88927	0.999533	17067	0	-15814
PRIM1	4	0.90516	0.9054	0.999533	17412	0	-44662
IFRD2	4	0.65096	0.68305	0.999533	13139	1	-0.74421
PRUNE2	4	0.96878	0.96898	0.999533	18670	0	-0.63061
OXLD1	4	0.10254	0.21907	0.993424	4264	1	-0.68764
PHLDB2	4	0.24934	0.38411	0.999533	7337	2	0.31002
NTHL1	4	0.24706	0.38167	0.999533	7297	2	-0.68244
BCL9	4	0.94805	0.94829	0.999533	18260	0	-11296
OR52I2	4	0.10752	0.22815	0.995611	4429	2	0.35018
METTL11B	4	0.2966	0.43444	0.999533	8302	1	-0.76526
AP5S1	4	0.63157	0.67077	0.999533	12889	1	-0.34129
PKM	4	0.19179	0.32267	0.999533	6186	2	0.5732
MCU	4	0.90929	0.90962	0.999533	17501	0	-10662
ISG20L2	4	0.27894	0.41555	0.999533	7933	1	-15768
RPL15	4	0.82923	0.82951	0.999533	15900	0	-12746
SLC1A1	4	0.39274	0.53673	0.999533	10276	1	-0.47906
SMR3A	4	0.87159	0.87189	0.999533	16718	0	-0.86946
PRKCSH	4	0.79217	0.79276	0.999533	15180	1	-11757
RHOJ	4	0.56586	0.63253	0.999533	12153	1	0.10971
PPP1R15B	4	0.37827	0.52126	0.999533	9988	1	-0.60803
CCDC64B	4	0.8909	0.89109	0.999533	17104	0	-0.60244
LCE5A	4	0.23265	0.36638	0.999533	7007	2	-0.3051
AMMECR1	4	0.48991	0.59333	0.999533	11390	1	-0.58142
TRPC1	4	0.97011	0.97032	0.999533	18700	0	-12042
RASSF8	4	0.40608	0.55112	0.999533	10566	1	-0.11656
RASSF6	4	0.4011	0.54579	0.999533	10454	1	-0.62189
CEP290	4	0.94241	0.94269	0.999533	18140	0	-0.85114
CXorf40A	4	0.47396	0.58578	0.999533	11247	1	-0.21238
ZNF675	4	0.96458	0.96481	0.999533	18580	0	-0.92468
ARFIP1	4	0.063849	0.14682	0.987134	2856	2	0.25699
TMEM132C	4	0.1431	0.2706	0.999482	5241	2	-0.093798
PET100	4	0.35837	0.50015	0.999533	9578	1	-0.72507
LRRC72	4	0.13067	0.25718	0.996197	4996	2	0.20705
DCHS2	4	0.153	0.28122	0.999533	5424	2	-0.28153
C7orf57	4	0.3628	0.50486	0.999533	9678	1	-0.3692
OR4D1	4	0.8631	0.86343	0.999533	16577	0	-0.54019
GOLGA8H	4	0.85289	0.85325	0.999533	16374	0	-2604
PDGFRB	4	0.75896	0.76281	0.999533	14584	1	-0.64852
SPDYE2	4	0.28612	0.4232	0.999533	8096	2	-26488
TSPAN33	4	0.029174	0.07743	0.987134	1480	2	-0.24907
HAPLN3	4	0.43755	0.56872	0.999533	10908	1	-0.86751
PROKR1	4	0.30835	0.44687	0.999533	8544	1	-0.8551
IPPK	4	0.85215	0.85253	0.999533	16361	0	-0.96784
SH3TC1	4	0.035427	0.09038	0.987134	1732	3	0.55491
BRCA1	4	0.88936	0.88954	0.999533	17070	0	-14426
UXT	4	0.84341	0.84373	0.999533	16189	0	-17529
CIB2	4	0.59186	0.64713	0.999533	12441	1	-33044
TBC1D28	4	0.56963	0.63461	0.999533	12192	1	-11701
DGAT2L6	4	0.81243	0.81276	0.999533	15564	0	-0.43934
TMEM151B	4	0.74225	0.74905	0.999533	14324	1	-0.65094
KRTCAP2	4	0.7075	0.72211	0.999533	13851	1	-0.67674
TSC22D4	4	0.087446	0.1915	0.987134	3752	1	-0.97547
TAPT1	4	0.96867	0.96888	0.999533	18665	0	-0.8739
PFKFB2	4	0.31683	0.45597	0.999533	8709	2	0.12146
C7orf73	4	0.93666	0.93691	0.999533	18031	0	-0.73747
GCLM	4	0.81195	0.81231	0.999533	15548	0	-0.82785
DDX1	4	0.949	0.9492	0.999533	18279	0	-11173
FAM195B	4	0.1033	0.22046	0.993424	4293	1	-0.17684
DUSP19	4	0.75758	0.76166	0.999533	14558	1	-0.58764
SLC22A9	4	0.47112	0.5844	0.999533	11215	1	-0.93351
IL17F	4	0.77074	0.7729	0.999533	14784	1	-0.72199
PCP4	4	0.13427	0.26111	0.997902	5064	2	-0.05488
DUS3L	4	0.9143	0.91461	0.999533	17605	0	-0.69734
CASQ2	4	0.20369	0.33544	0.999533	6418	2	-0.90234
FBXO6	4	0.038998	0.097589	0.987134	1868	3	0.47964
SPDYC	4	0.3341	0.47445	0.999533	9049	2	-0.51122
UGT1A3	4	0.89487	0.89505	0.999533	17180	0	-0.90795
CD163L1	4	0.11611	0.24154	0.995611	4686	2	-0.19488
CDYL	4	0.88459	0.88483	0.999533	16978	0	-0.70619
POLE2	4	0.76776	0.7703	0.999533	14738	1	-1641
INTS2	4	0.93211	0.93237	0.999533	17932	0	-14157
FAM204A	4	0.30174	0.43992	0.999533	8417	1	-0.71206
IFNAR2	4	0.88966	0.88986	0.999533	17078	0	-11689
PTCD2	4	0.41057	0.55599	0.999533	10648	2	-0.12576
FZR1	4	0.36154	0.50352	0.999533	9652	1	-11733
FCF1	4	0.74102	0.74805	0.999533	14308	1	-15542
C2orf70	4	0.30416	0.44247	0.999533	8456	2	0.27444
FLT3	4	0.86202	0.86237	0.999533	16557	0	-0.69092
OR2W5	4	0.94186	0.94213	0.999533	18127	0	-0.77563
SLC4A11	4	0.4015	0.5462	0.999533	10466	2	0.15996
DCAF12L1	4	0.90211	0.90237	0.999533	17347	0	-0.51053
TAS2R20	4	0.25805	0.39325	0.999533	7518	2	0.035011
MED14	4	0.054603	0.12886	0.987134	2466	1	-13803
GAPVD1	4	0.83838	0.83868	0.999533	16081	0	-0.74306
C4orf48	4	0.14533	0.27303	0.999533	5279	1	-0.79443
NAV1	4	0.15562	0.28406	0.999533	5476	2	0.11549
TAF5	4	0.9568	0.957	0.999533	18444	0	-10549
MED27	4	0.61948	0.66342	0.999533	12753	1	-10559
OR52N5	4	0.79841	0.79883	0.999533	15292	1	-0.5944
DDX21	4	0.15625	0.28471	0.999533	5488	1	-11502
LOC388436	4	0.84367	0.84397	0.999533	16195	0	-12455
SLC35G2	4	0.23691	0.37094	0.999533	7086	1	-0.482
PPIL2	4	0.96897	0.96917	0.999533	18678	0	-13202
CHAD	4	0.89523	0.89543	0.999533	17188	0	-0.54779
HPSE	4	0.95685	0.95706	0.999533	18446	0	-0.49065
MYH11	4	0.14106	0.2684	0.998885	5198	1	-0.85109
SRGN	4	0.95258	0.95283	0.999533	18342	0	-0.86358
SERINC1	4	0.93432	0.93461	0.999533	17984	0	-0.83446
AGPAT1	4	0.093507	0.20266	0.99125	3954	1	-32901
MRPL57	4	0.1868	0.31732	0.999533	6085	1	-15874
ATP5B	4	0.46639	0.58214	0.999533	11171	1	-0.50621
ATP9B	4	0.056256	0.1321	0.987134	2536	2	0.17396
DOCK3	4	0.28598	0.42305	0.999533	8092	2	-0.58095
C12orf50	4	0.32746	0.4673	0.999533	8922	1	-0.060722
SLC23A1	4	0.32354	0.46311	0.999533	8835	1	-0.90618
ARMCX3	4	0.25509	0.39011	0.999533	7447	2	-0.42712
LYPD3	4	0.15912	0.28772	0.999533	5546	2	0.18947
LSM14B	4	0.2981	0.43608	0.999533	8342	1	-0.38032
AMZ2	4	0.86911	0.86941	0.999533	16674	0	-0.74609
OPRL1	4	0.05848	0.1364	0.987134	2627	3	0.57187
DIP2C	4	0.96729	0.9675	0.999533	18635	0	-0.81216
CCDC71L	4	0.32265	0.46218	0.999533	8819	1	-0.67852
HAUS7	4	0.69047	0.70975	0.999533	13626	1	-0.98462
PLB1	4	0.87738	0.87766	0.999533	16826	0	-0.6871
ARMT1	4	0.1511	0.27921	0.999533	5389	1	-0.12677
FBXO27	4	0.83437	0.83466	0.999533	16005	0	-0.66399
MEX3A	4	0.55676	0.62751	0.999533	12047	1	-0.031916
ABHD16A	4	0.412	0.55746	0.999533	10680	1	-12248
LGMN	4	0.045259	0.11035	0.987134	2105	1	-14534
CD5L	4	0.81662	0.81695	0.999533	15653	0	-0.95682
CLEC2L	4	0.7995	0.79994	0.999533	15314	1	-0.11383
PEX19	4	0.2838	0.42069	0.999533	8045	1	-0.64734
TSPAN16	4	0.33418	0.47454	0.999533	9051	1	-0.61811
JRK	4	0.29461	0.43229	0.999533	8266	1	-0.15829
ALAS2	4	0.27094	0.40698	0.999533	7768	1	-0.73857
TSR2	4	0.71361	0.72662	0.999533	13915	1	-10017
OR5B12	4	0.6061	0.6554	0.999533	12590	1	-0.73526
NRDE2	4	0.14163	0.26903	0.999012	5212	2	0.23128
NFYB	4	0.92646	0.92673	0.999533	17828	0	-0.77819
OR1J2	4	0.20481	0.33662	0.999533	6442	2	0.027737
RBFA	4	0.92288	0.92319	0.999533	17759	0	-0.88066
COQ2	4	0.78212	0.78336	0.999533	14986	1	-0.60634
GJA10	4	0.033098	0.085573	0.987134	1640	2	0.13852
SLC25A39	4	0.35437	0.49593	0.999533	9489	2	-0.41217
RNF139	4	0.92156	0.92185	0.999533	17735	0	-0.8266
CELF3	4	0.57523	0.63774	0.999533	12252	1	0.0042402
SCML1	4	0.68618	0.70666	0.999533	13565	1	-0.34474
GLUL	4	0.009701	0.03261	0.955109	660	2	0.17513
OR5AP2	4	0.80136	0.80177	0.999533	15342	1	-0.7028
ADCY2	4	0.27513	0.41148	0.999533	7863	2	0.16313
LDLRAD2	4	0.29466	0.43235	0.999533	8268	2	-0.48747
FAM24A	4	0.94399	0.94428	0.999533	18173	0	-0.64413
GPRIN1	4	0.070108	0.15899	0.987134	3086	2	0.17263
CMTM7	4	0.42656	0.56387	0.999533	10803	1	-0.6353
PPP1R27	4	0.91708	0.91741	0.999533	17657	0	-10175
OR1L3	4	0.23125	0.36489	0.999533	6977	2	0.16065
CLNS1A	4	0.92672	0.92698	0.999533	17836	0	-31835
PSMD8	4	0.94656	0.9468	0.999533	18231	0	-33484
HFM1	4	0.63143	0.67069	0.999533	12888	1	-0.51367
TRIM31	4	0.68384	0.705	0.999533	13536	1	-0.74841
DLL4	4	0.92485	0.92512	0.999533	17799	0	-0.62038
PLEKHO1	4	0.65433	0.68523	0.999533	13170	1	-0.067589
DOCK9	4	0.83221	0.83257	0.999533	15957	0	-0.27925
TAF2	4	0.369	0.51135	0.999533	9807	1	-22641
ANKH	4	0.89642	0.89665	0.999533	17224	0	-0.20269
[truncated: 17,365 more rows]
